# Supplementary material
Source: PubMed Central journal article supplement (PMC3812808)

*Lmx1a\_67.70*

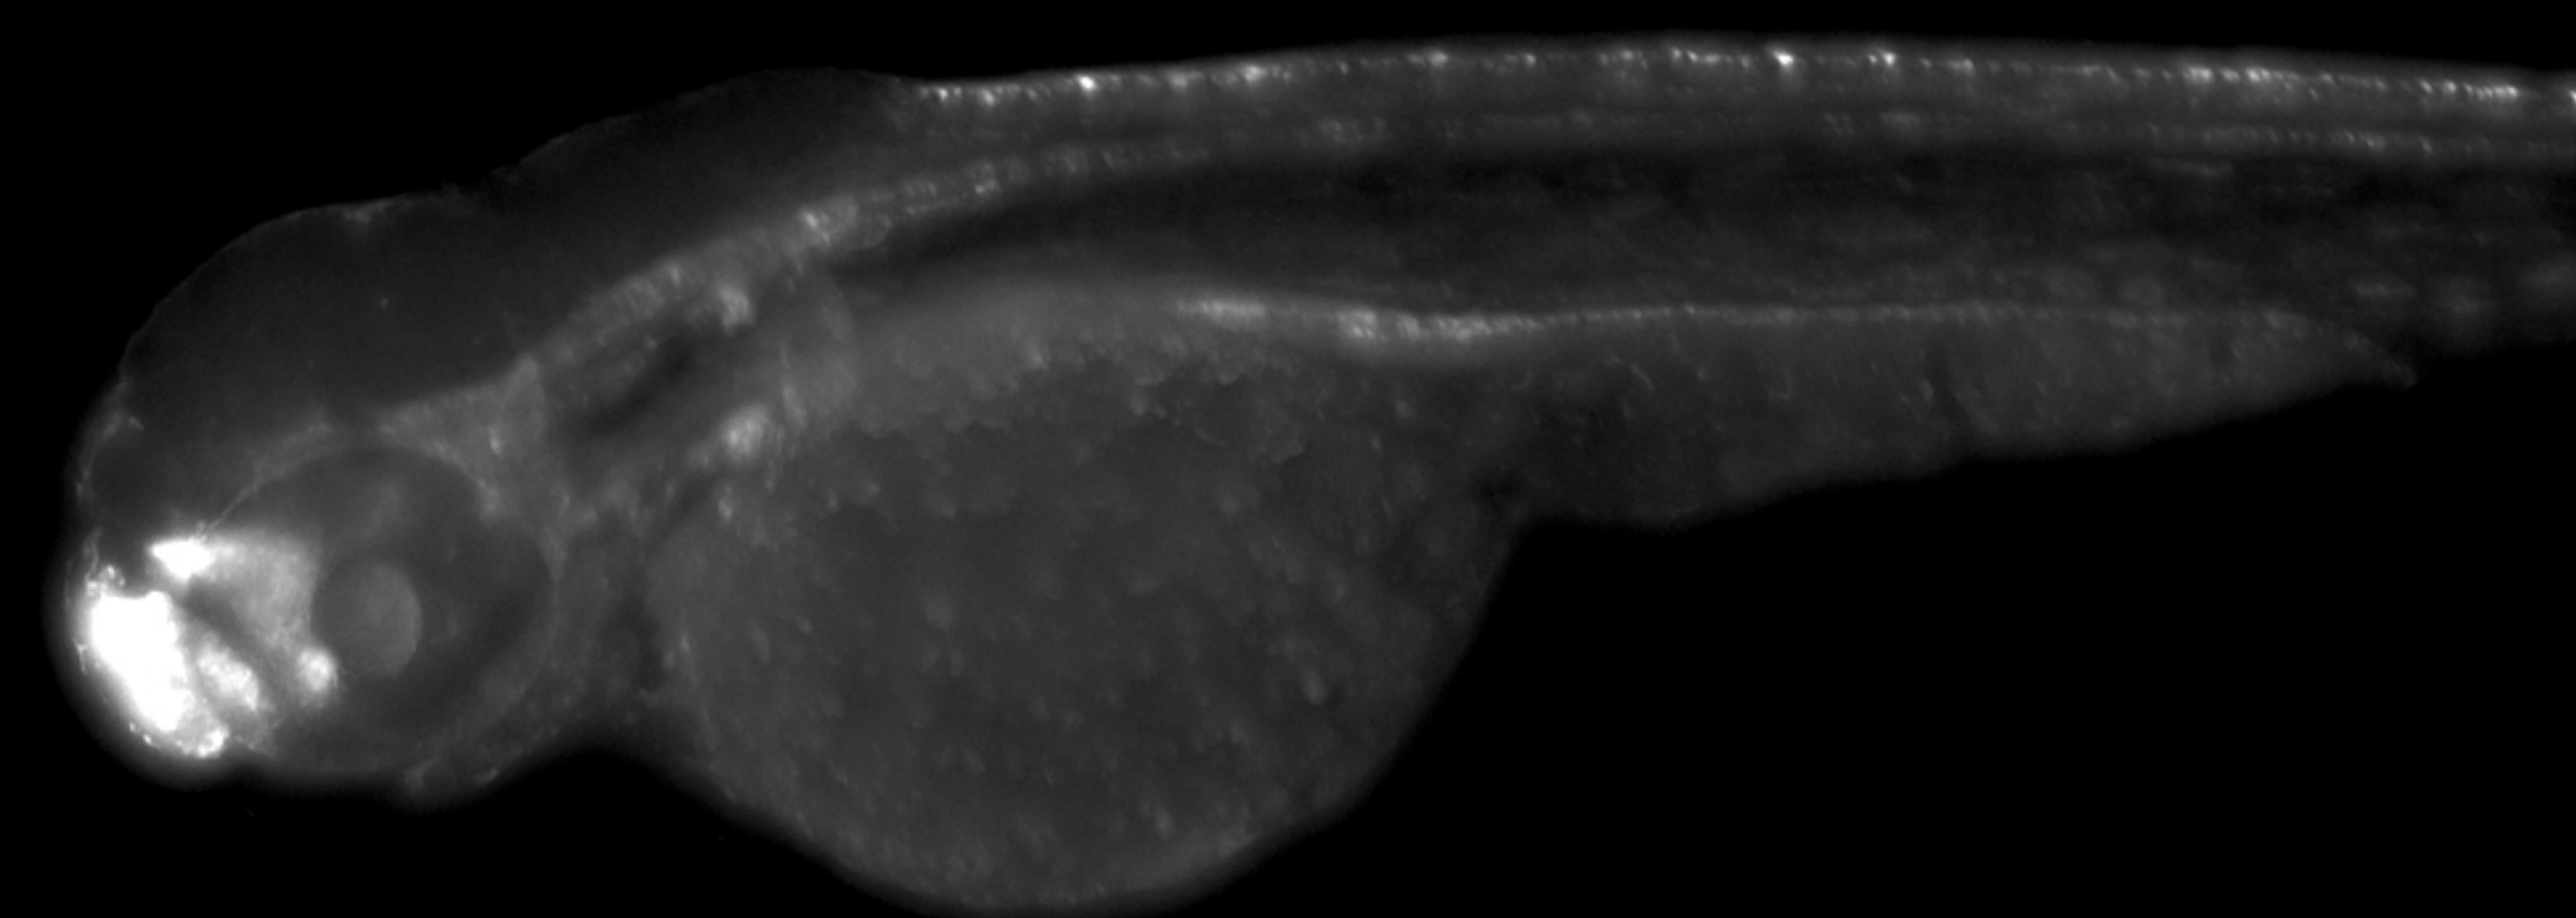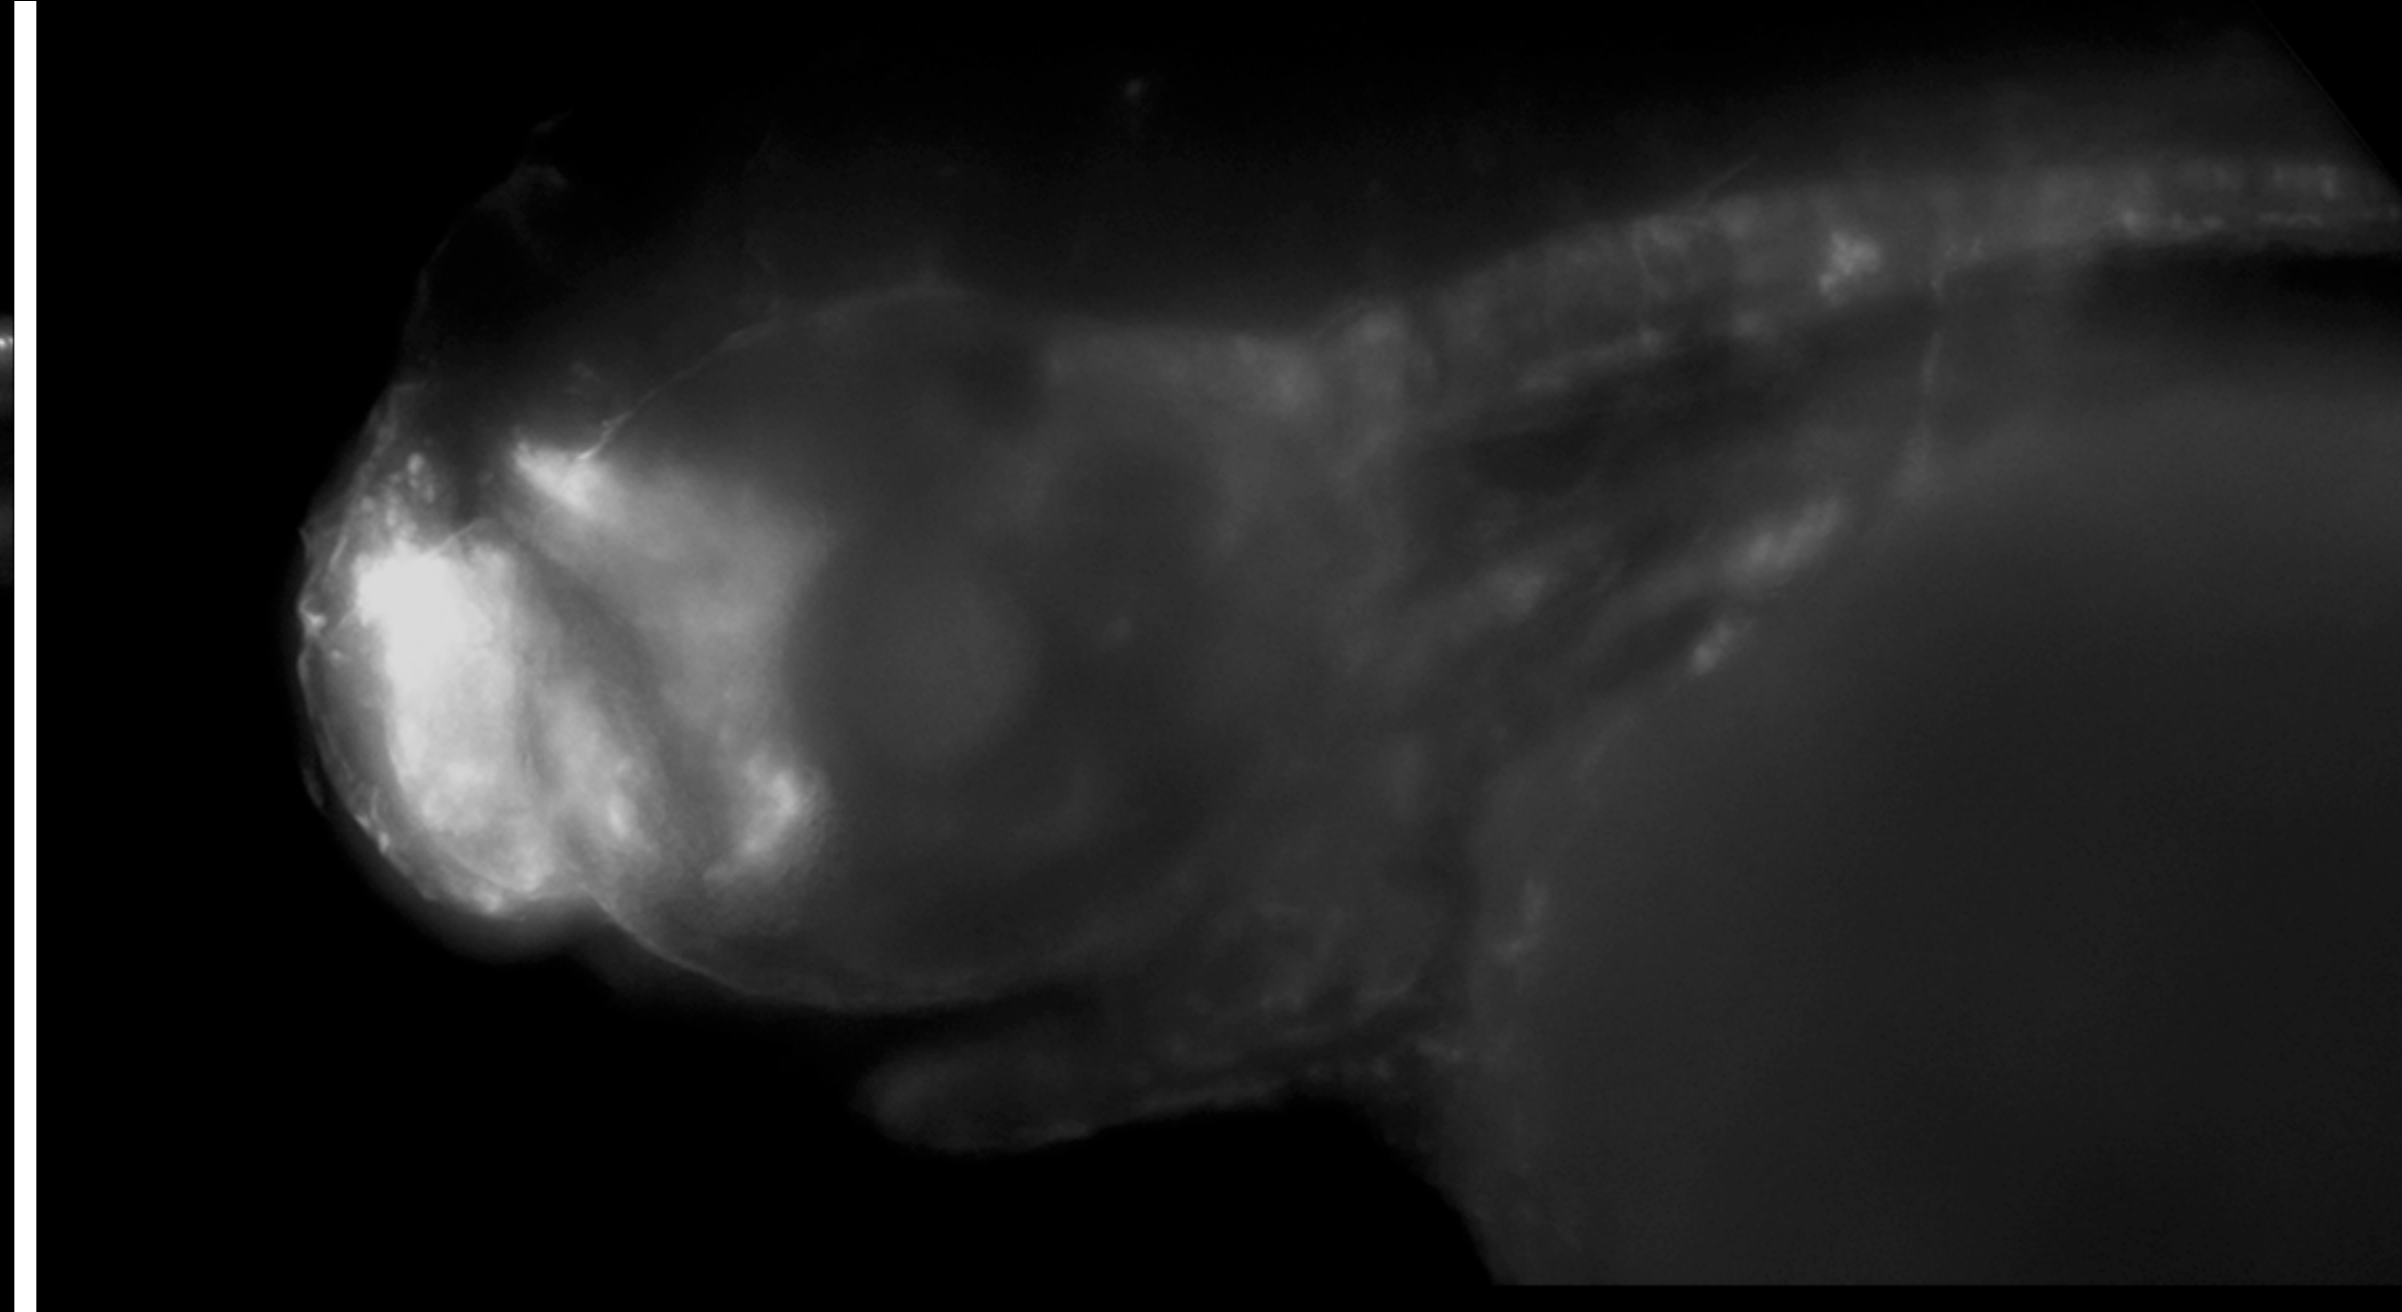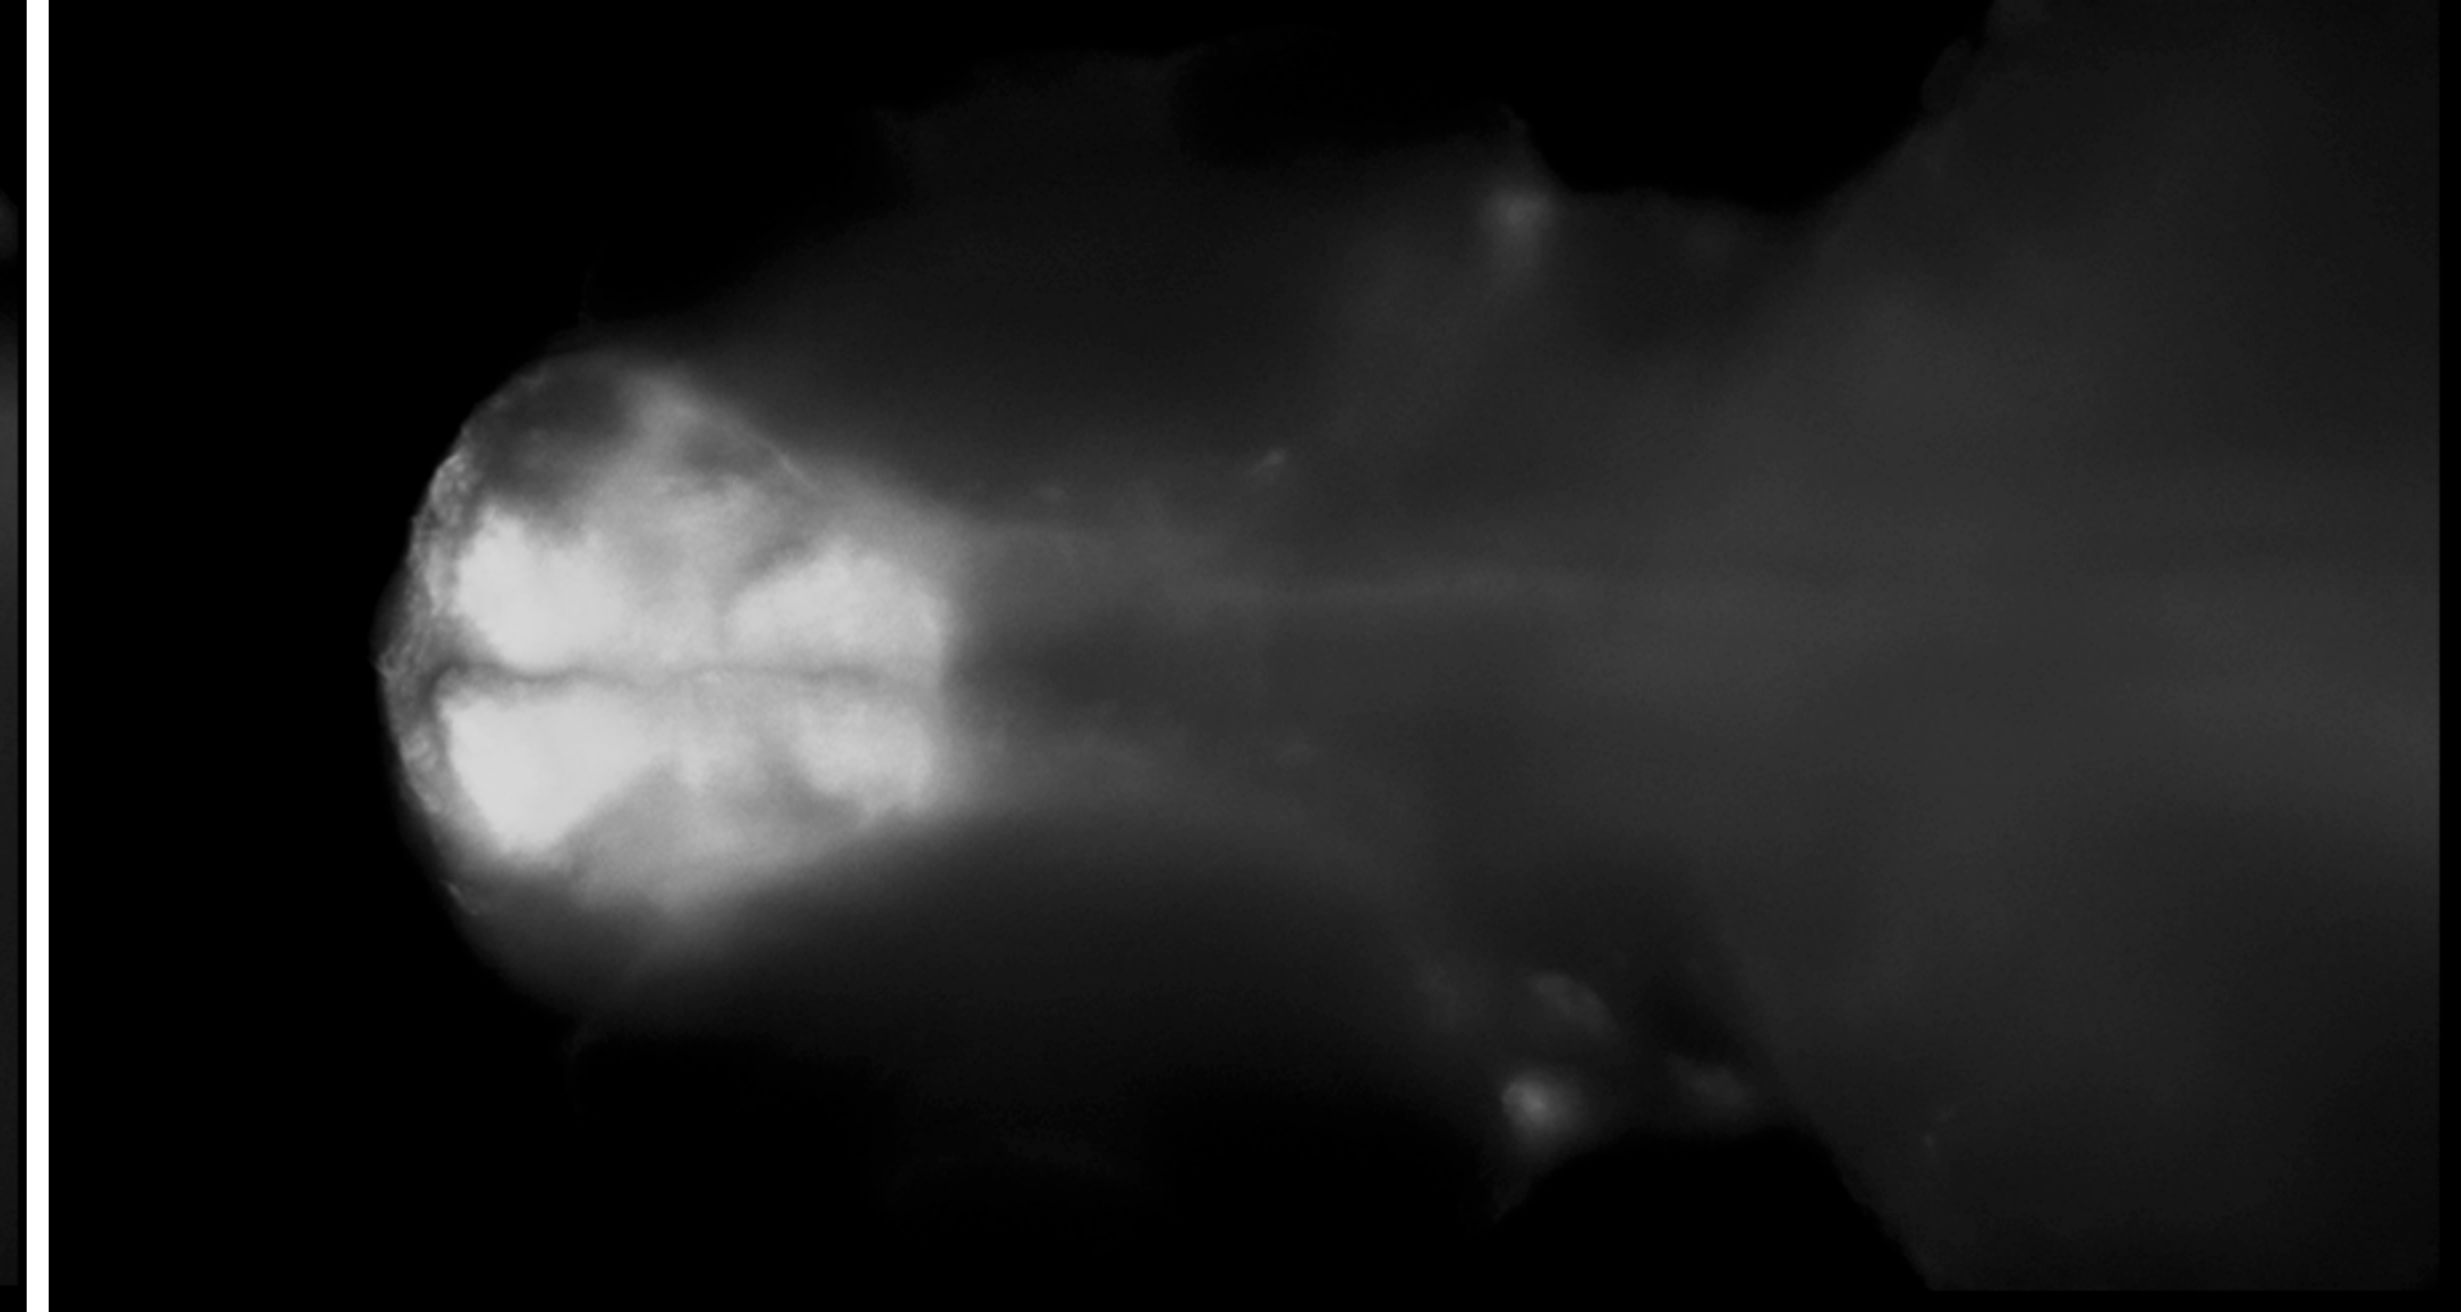

*Lmx1a\_71.89*

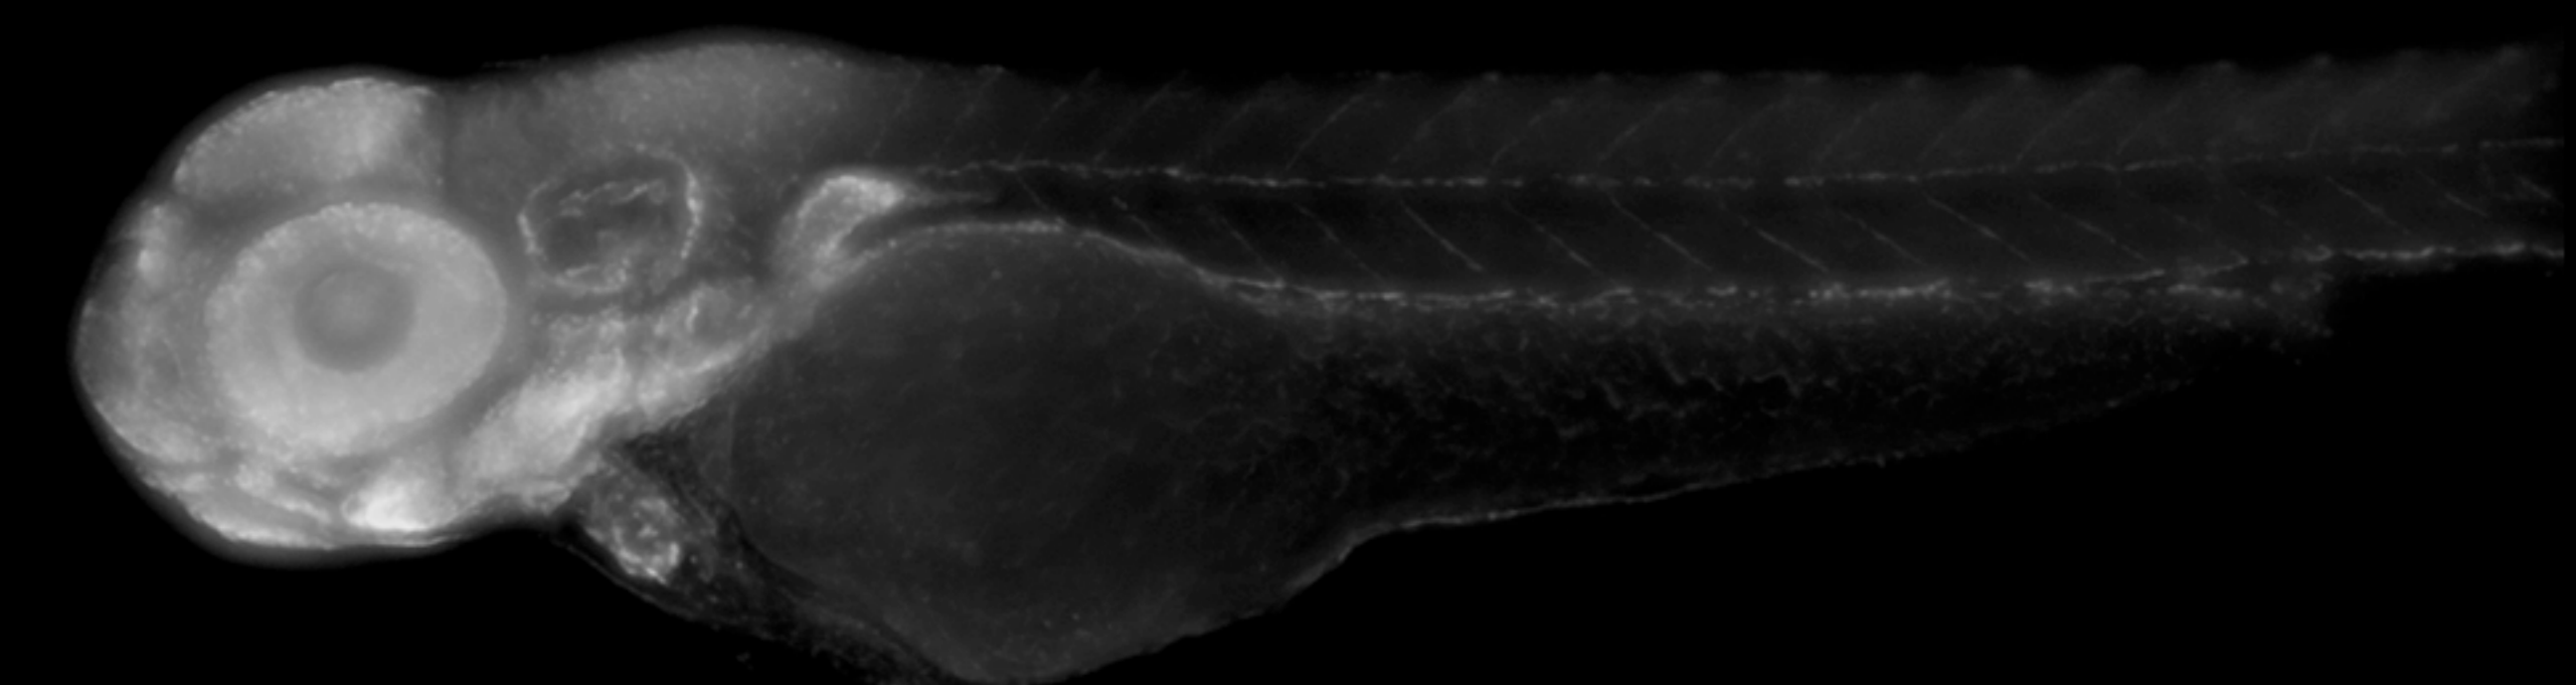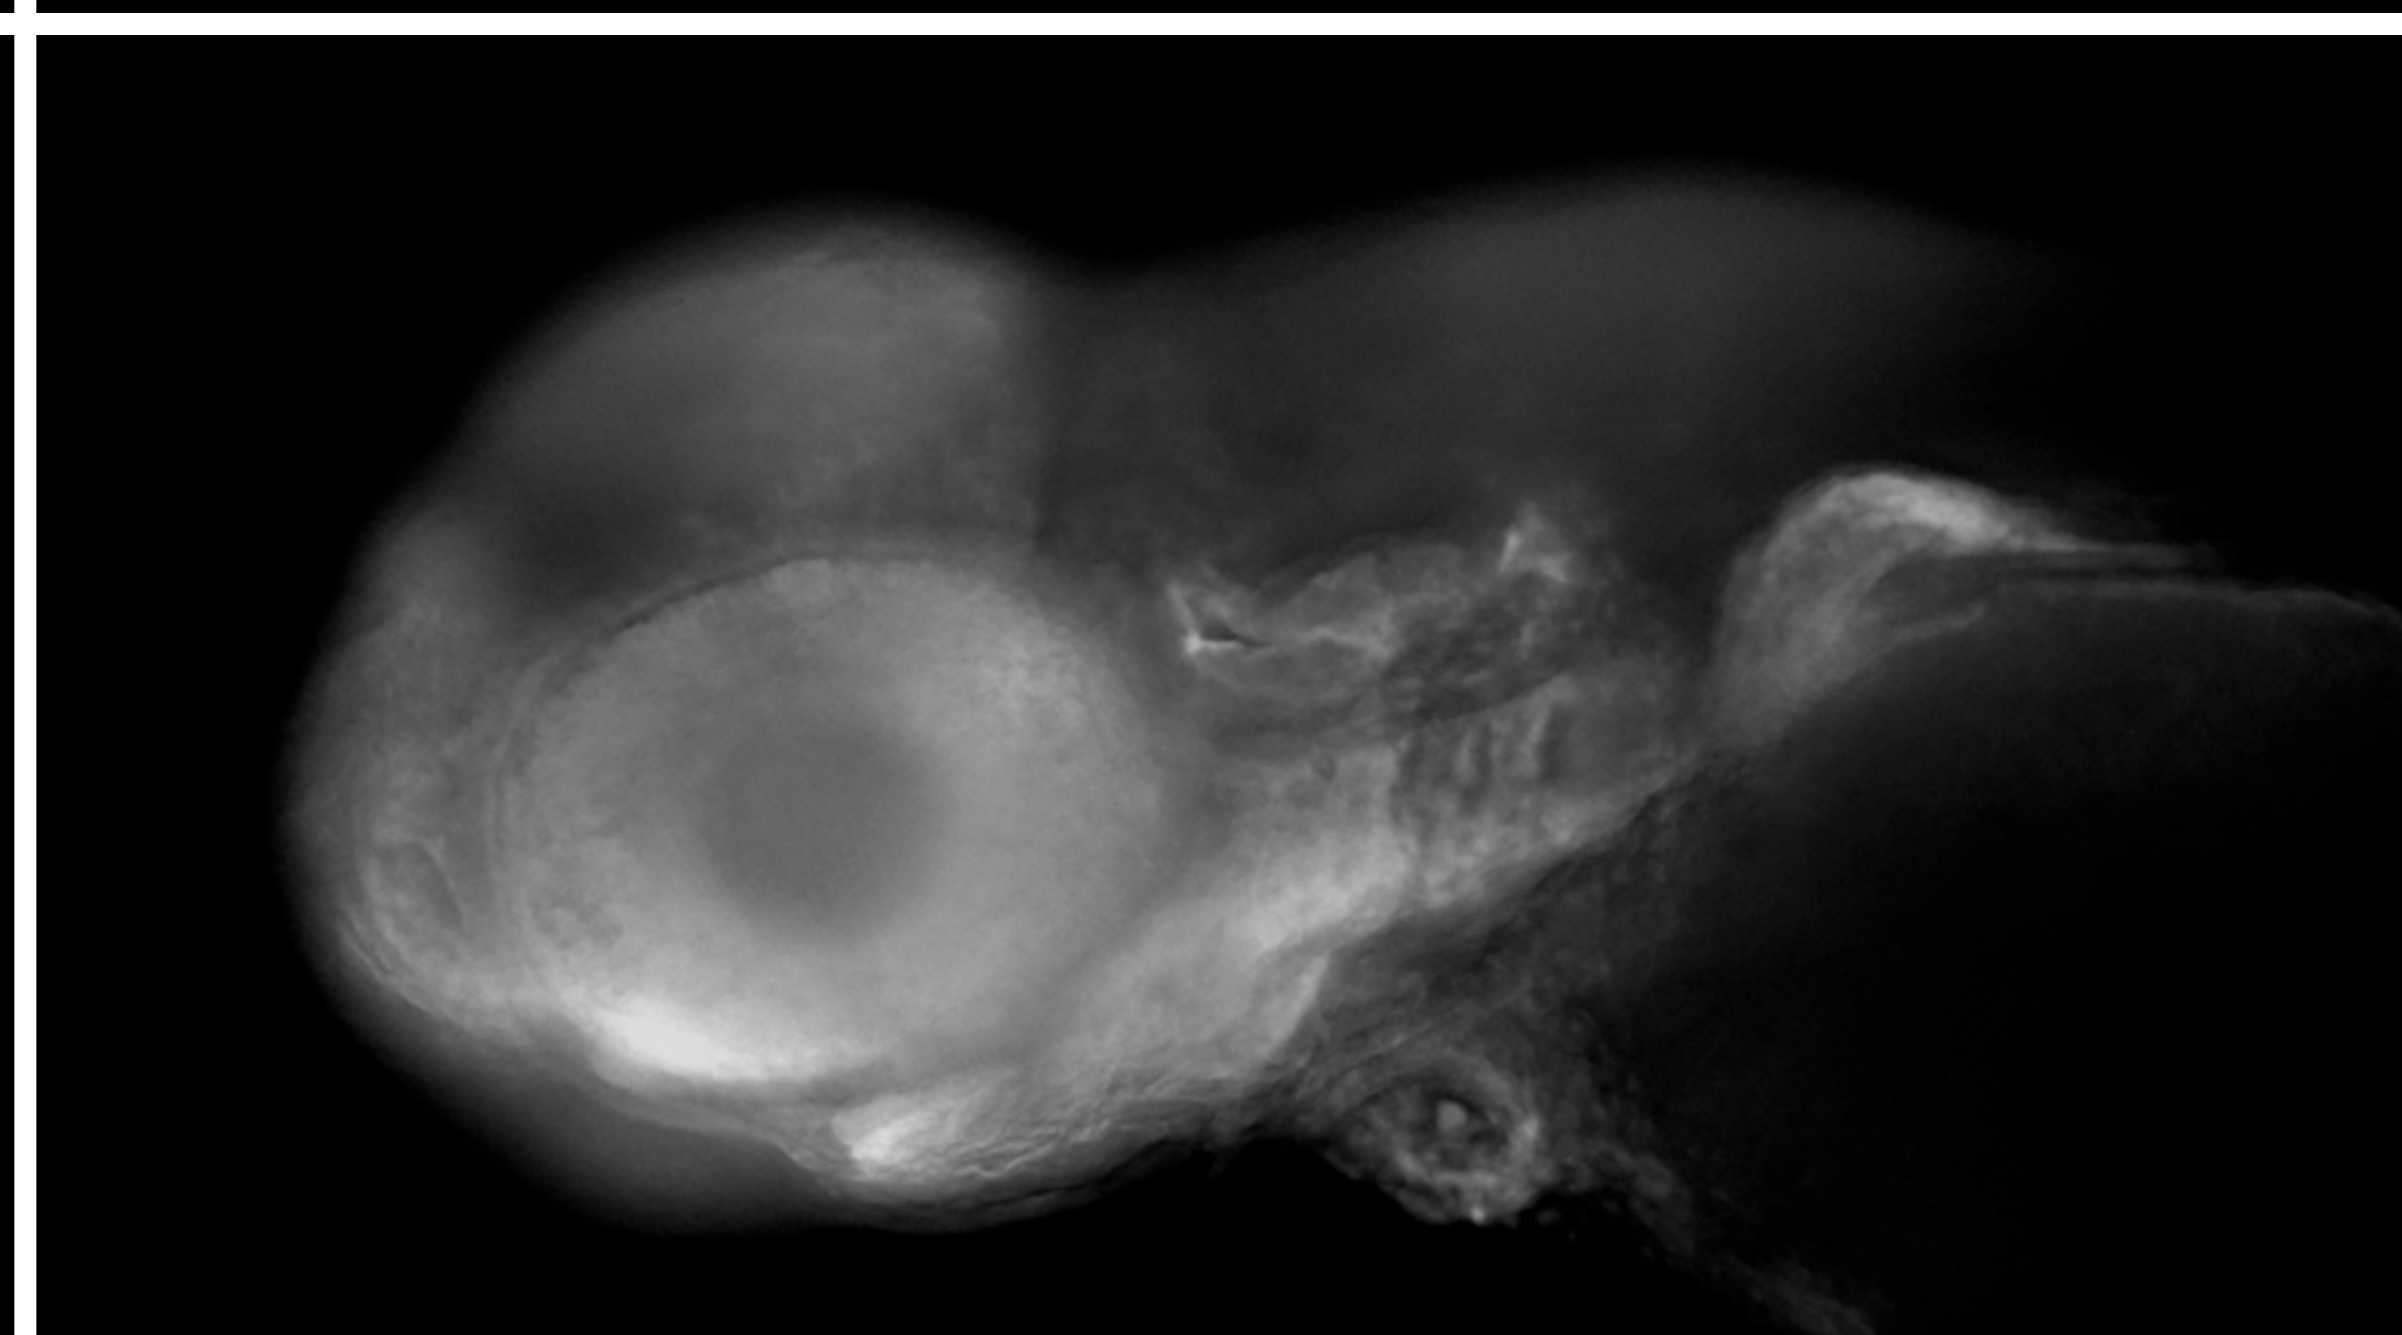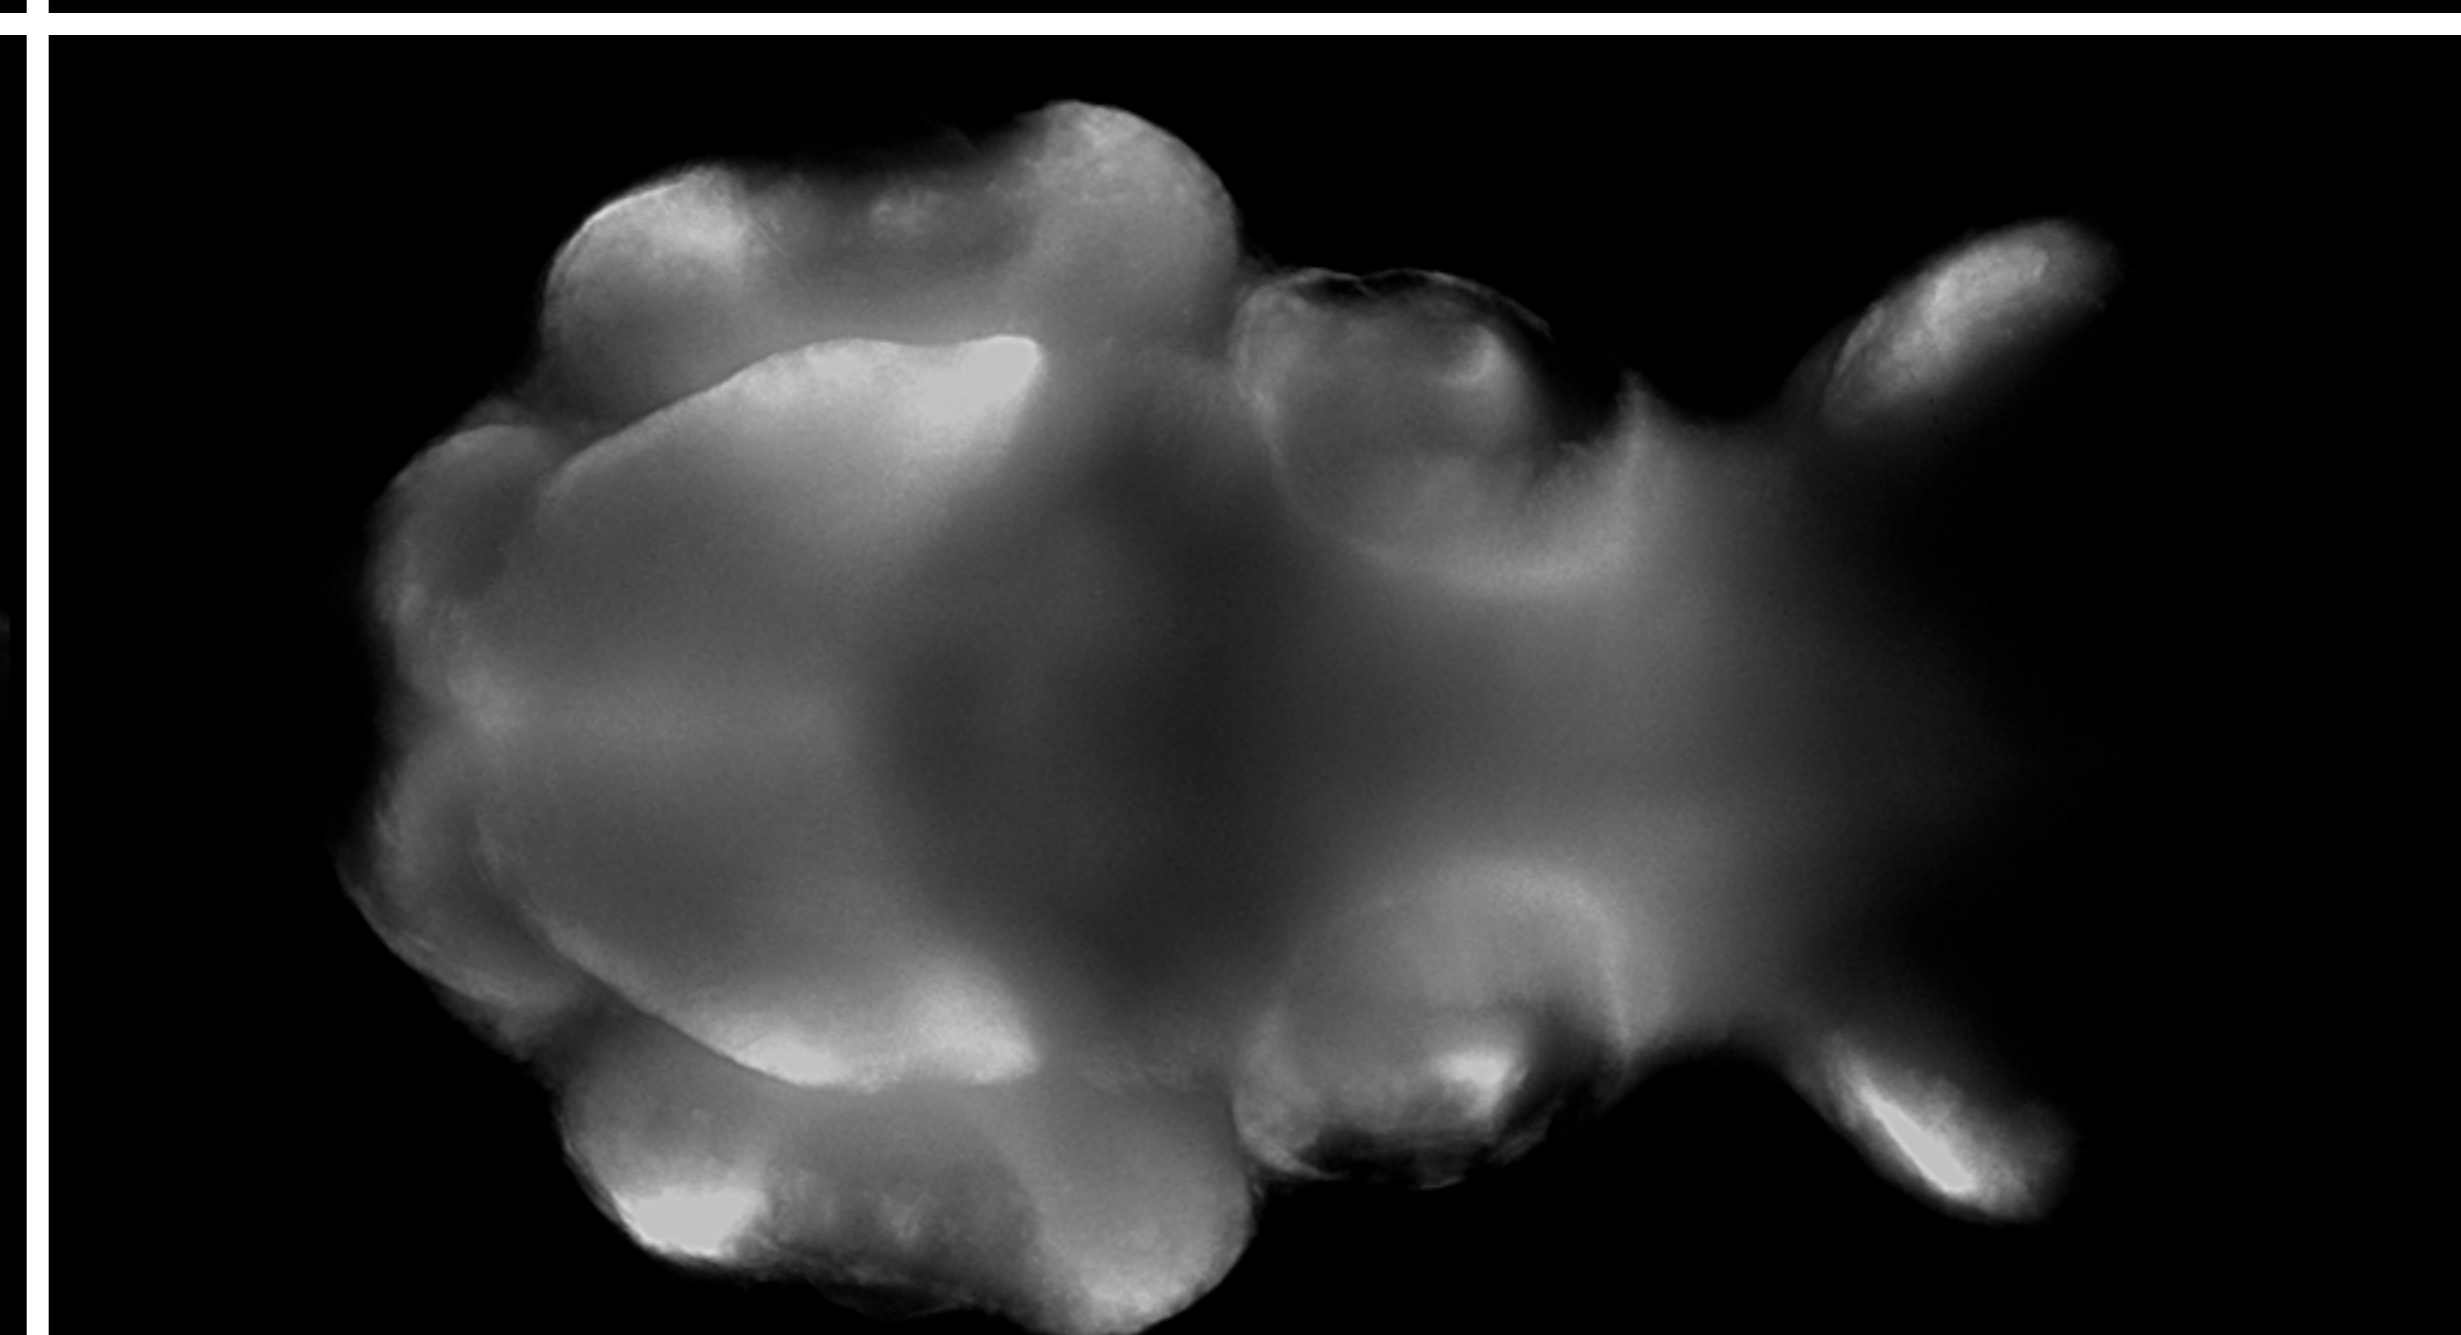

*Lmx1a\_92.33*

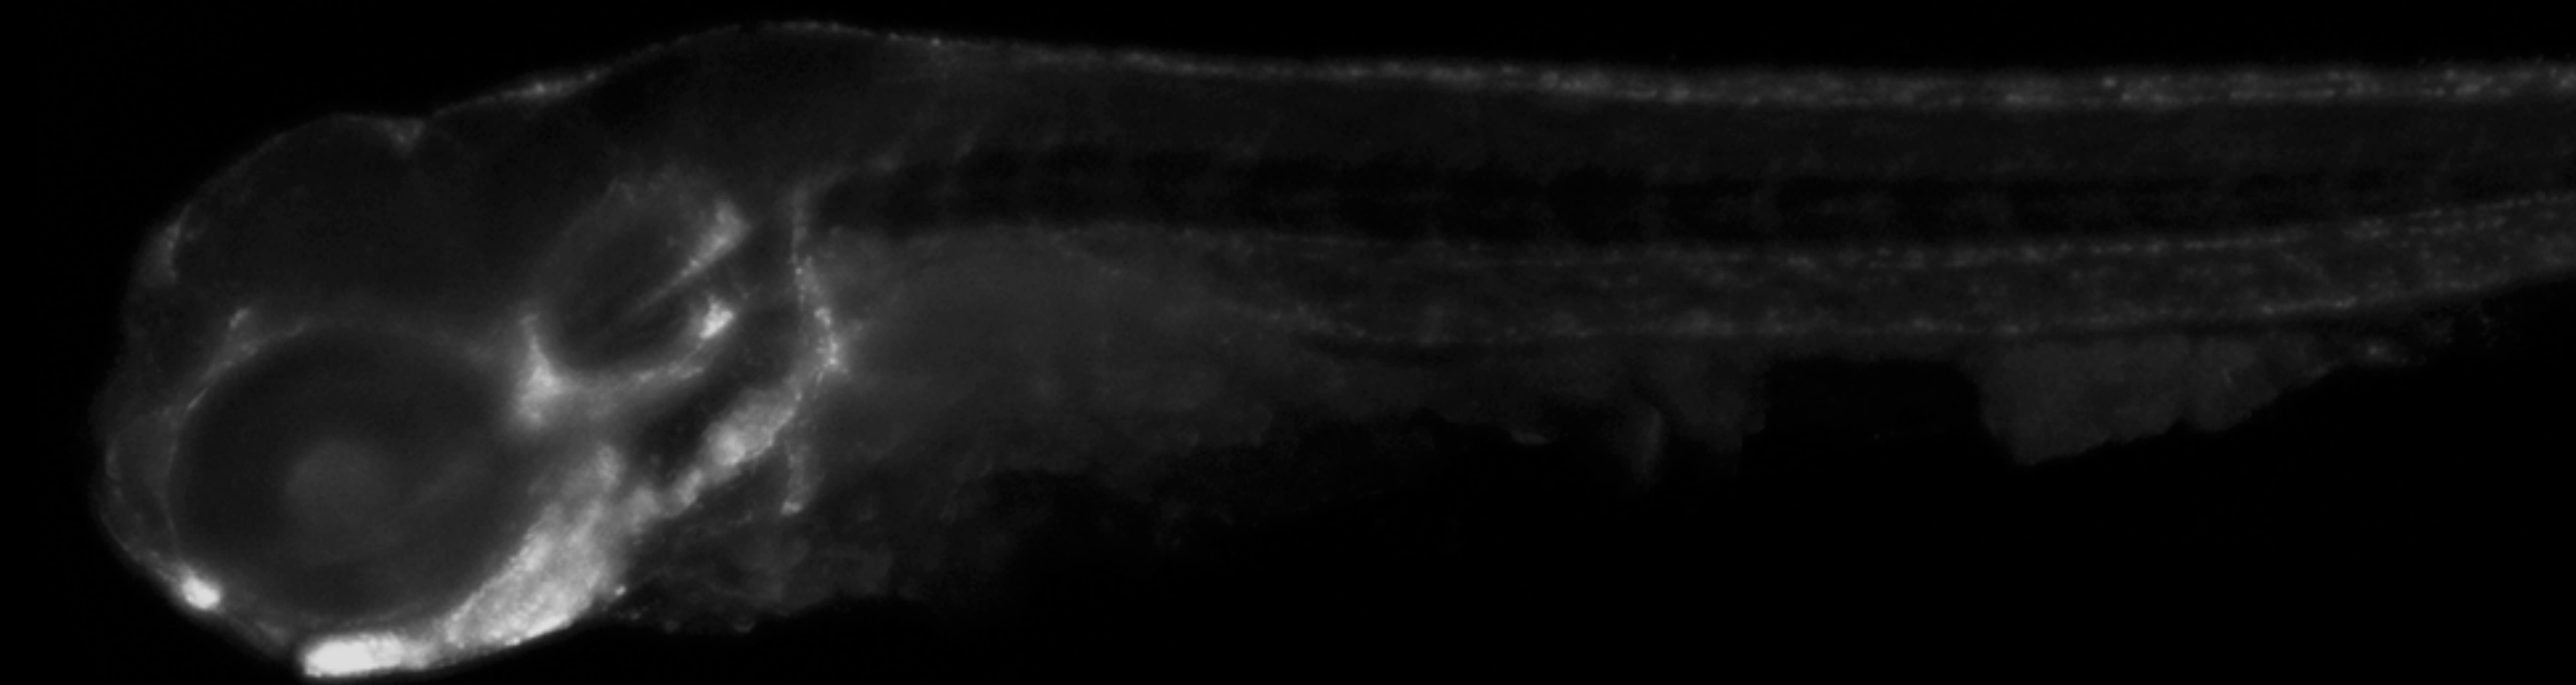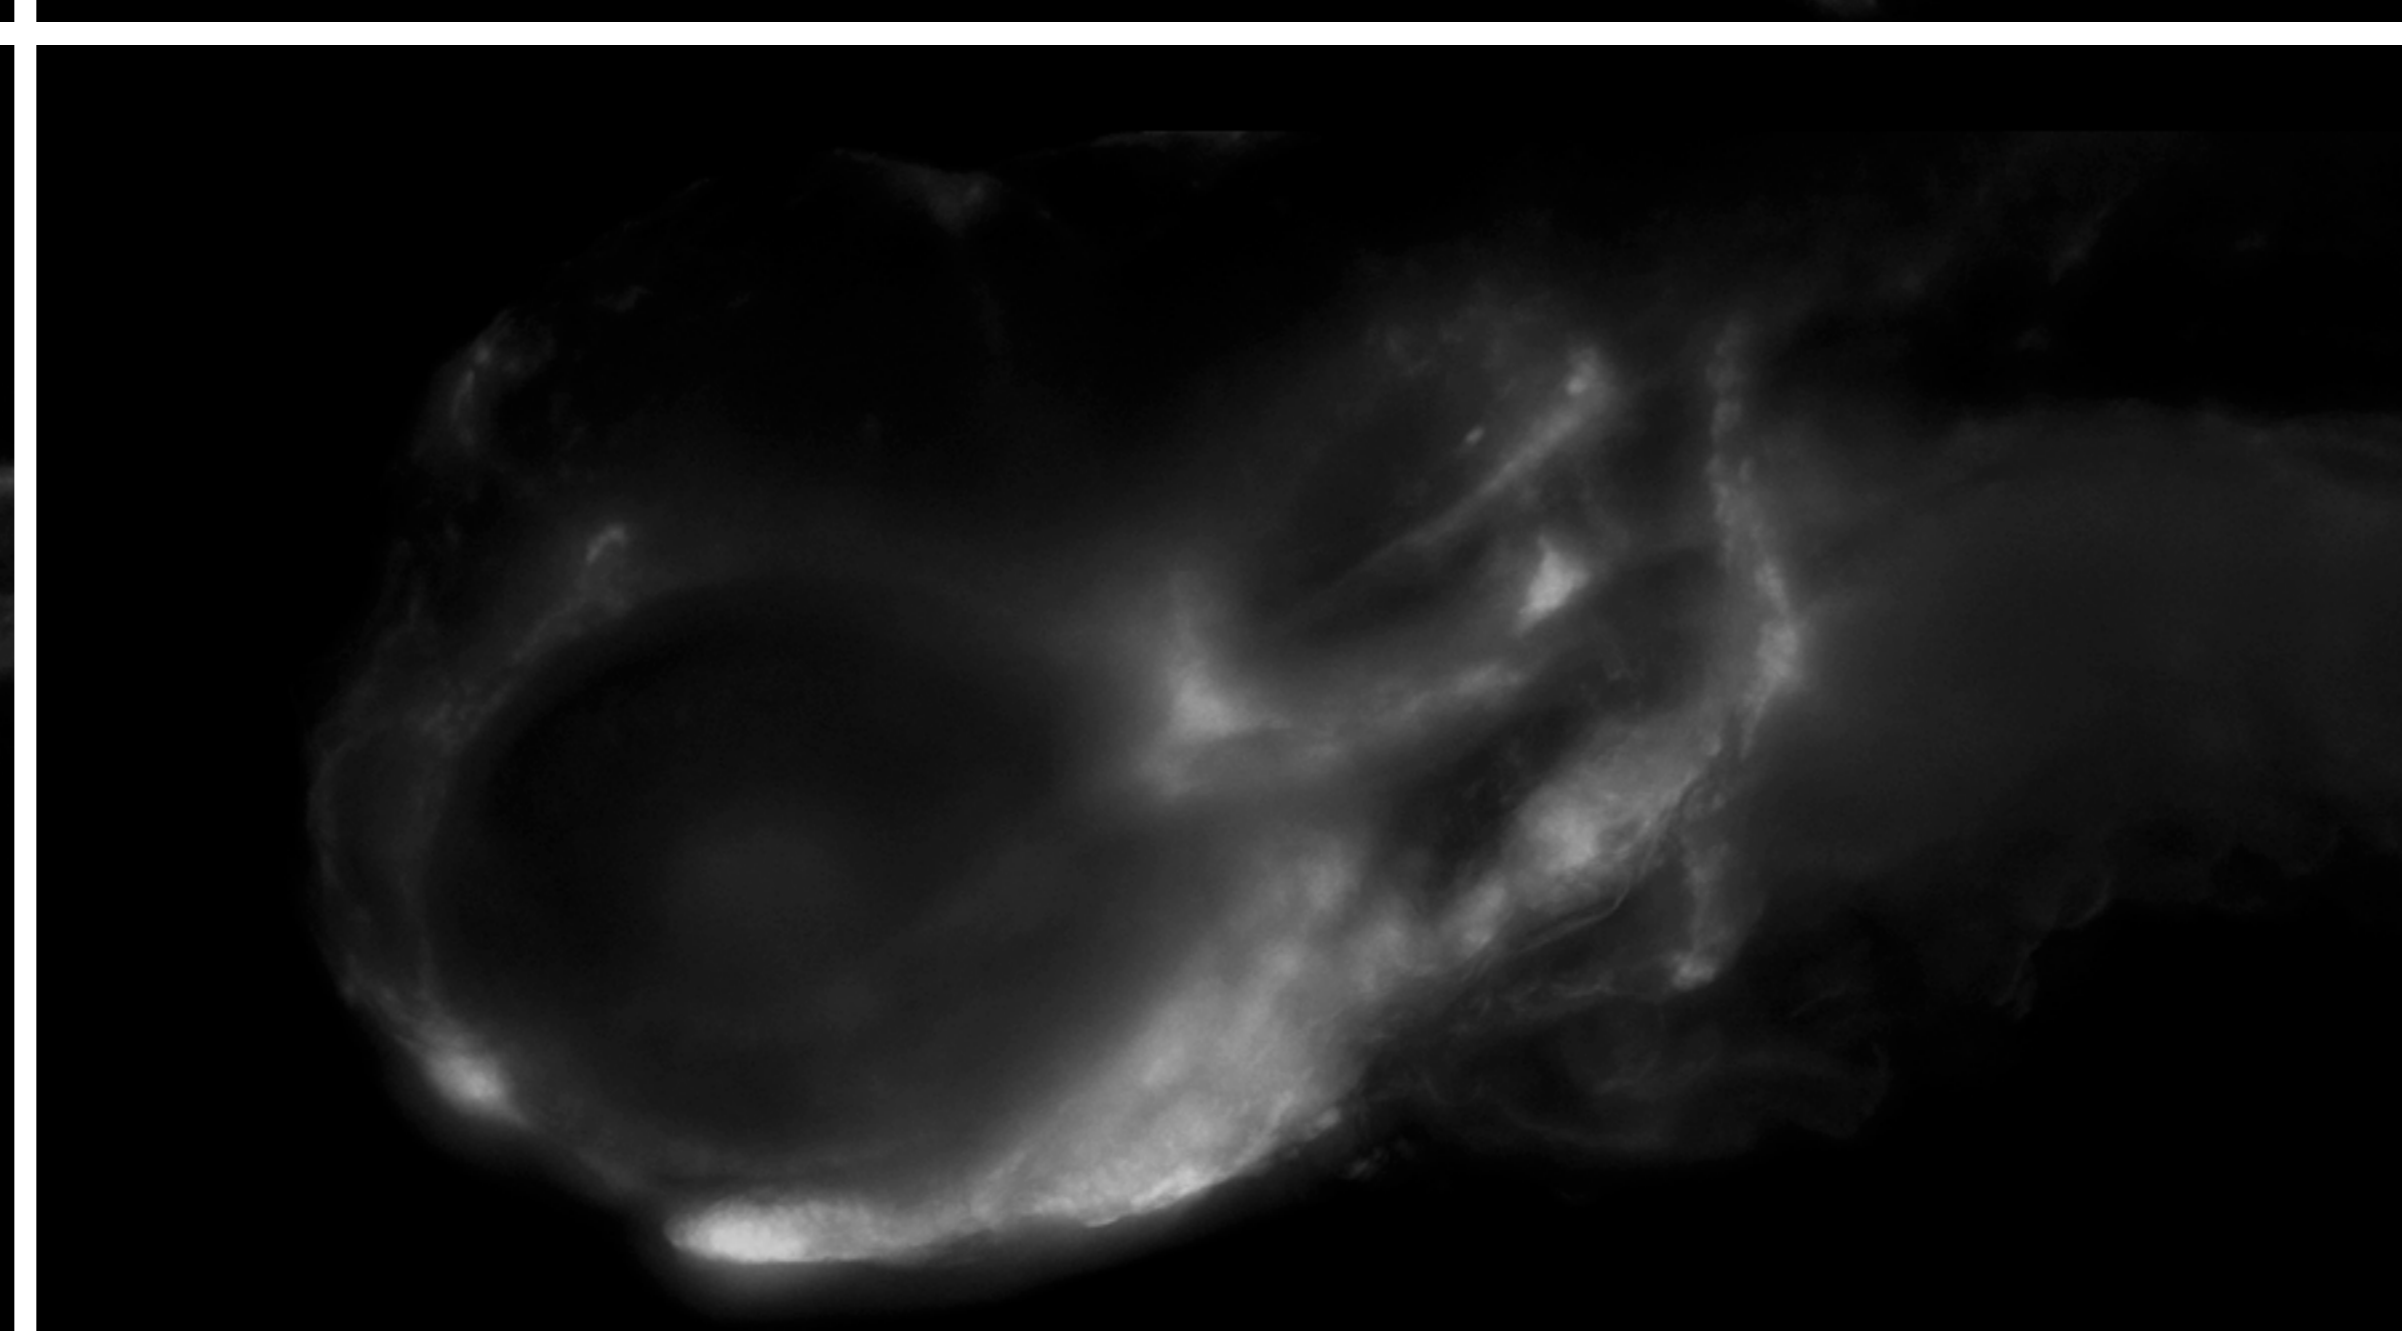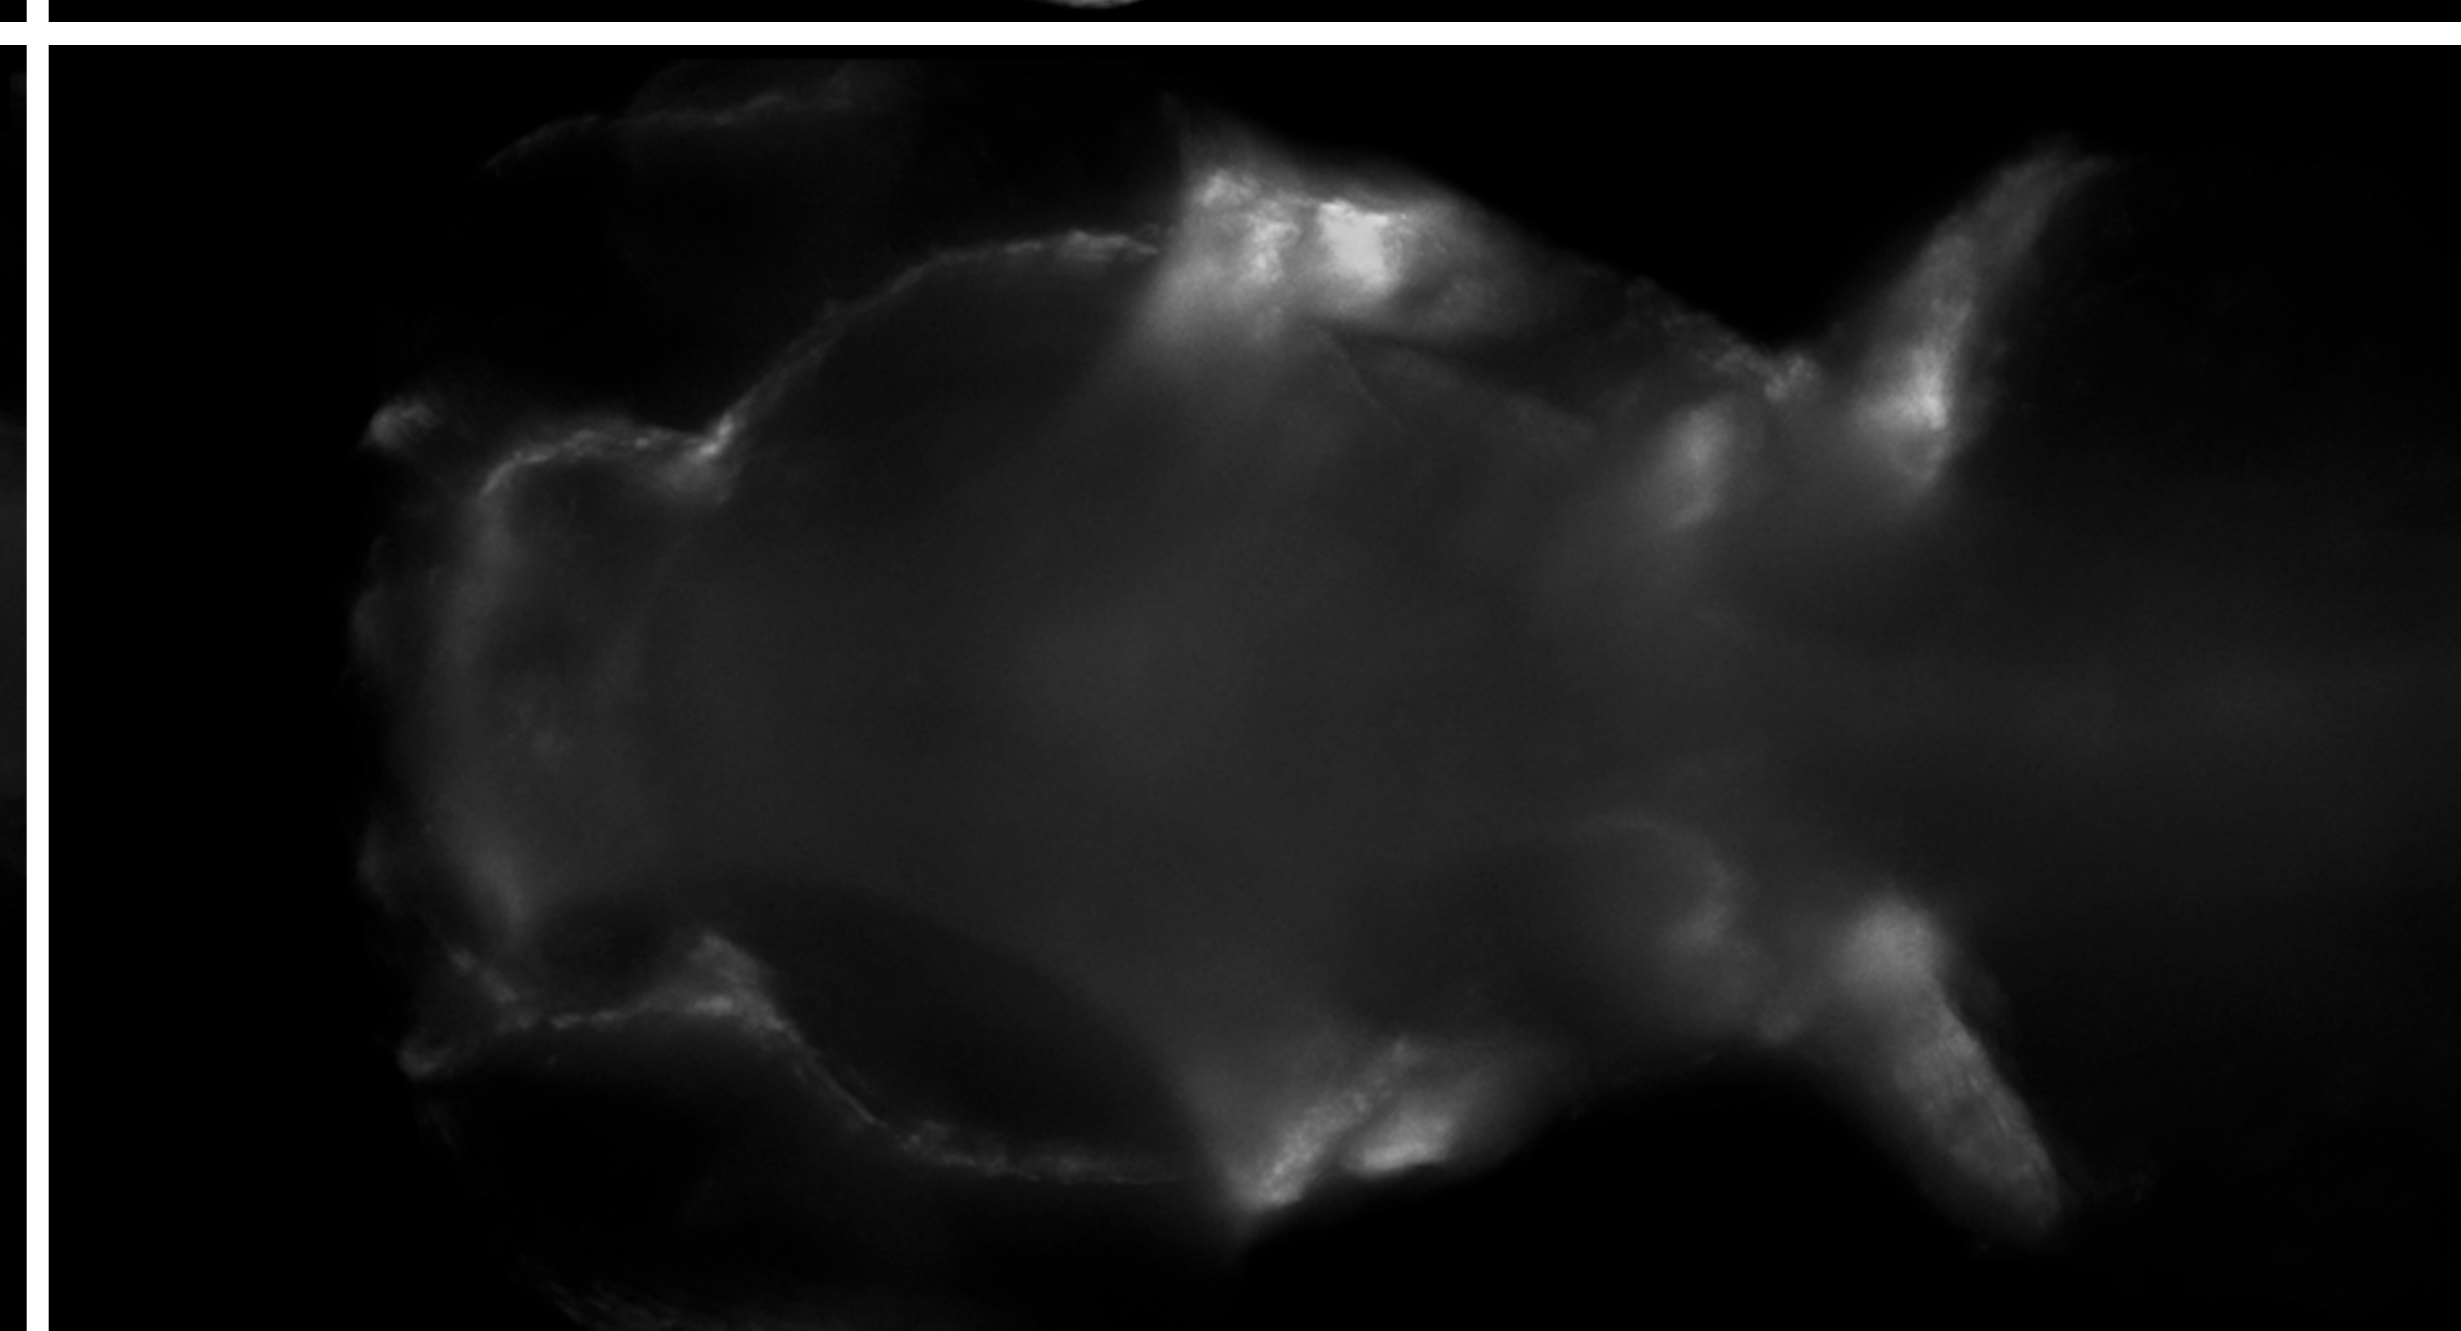

*Lmx1a\_102.30*

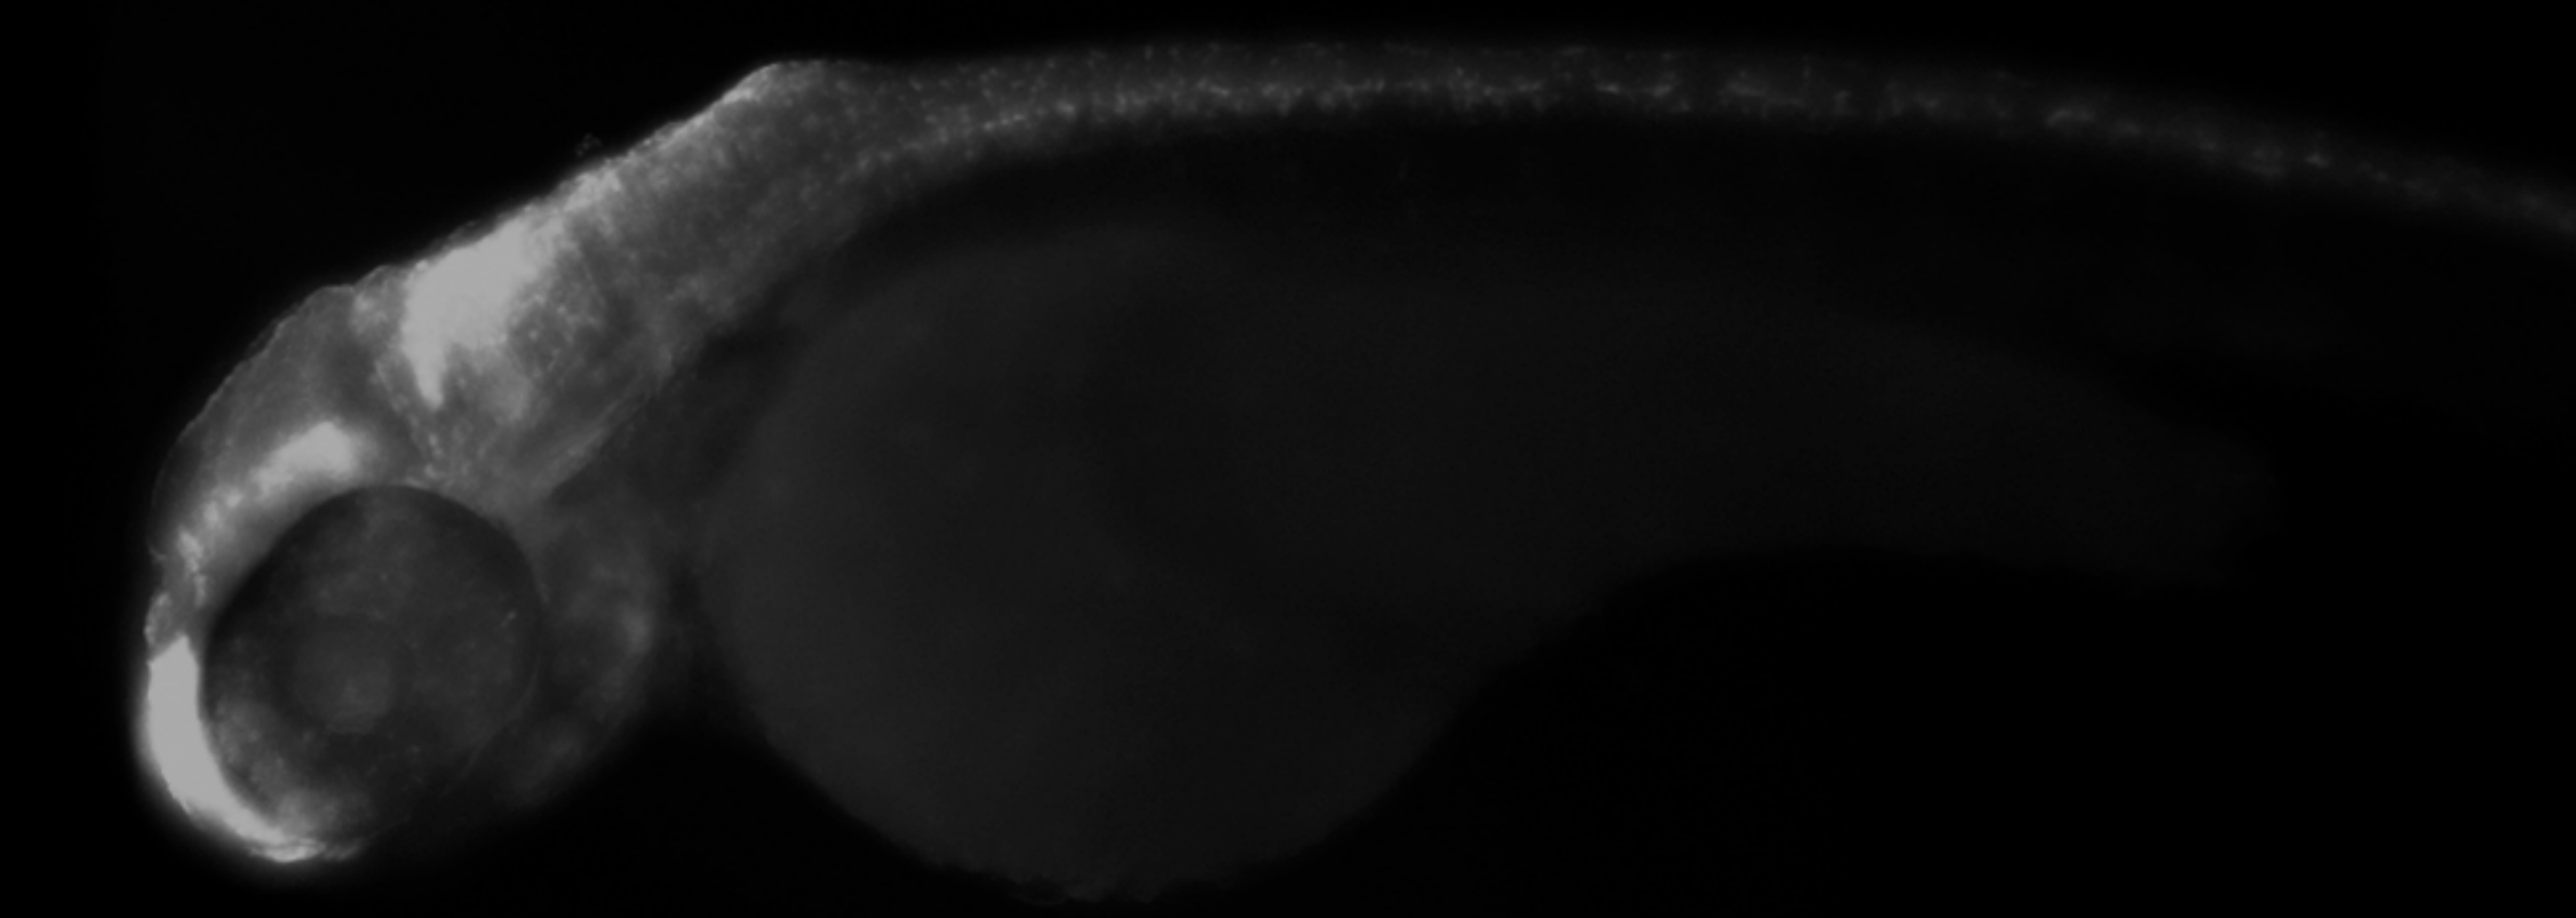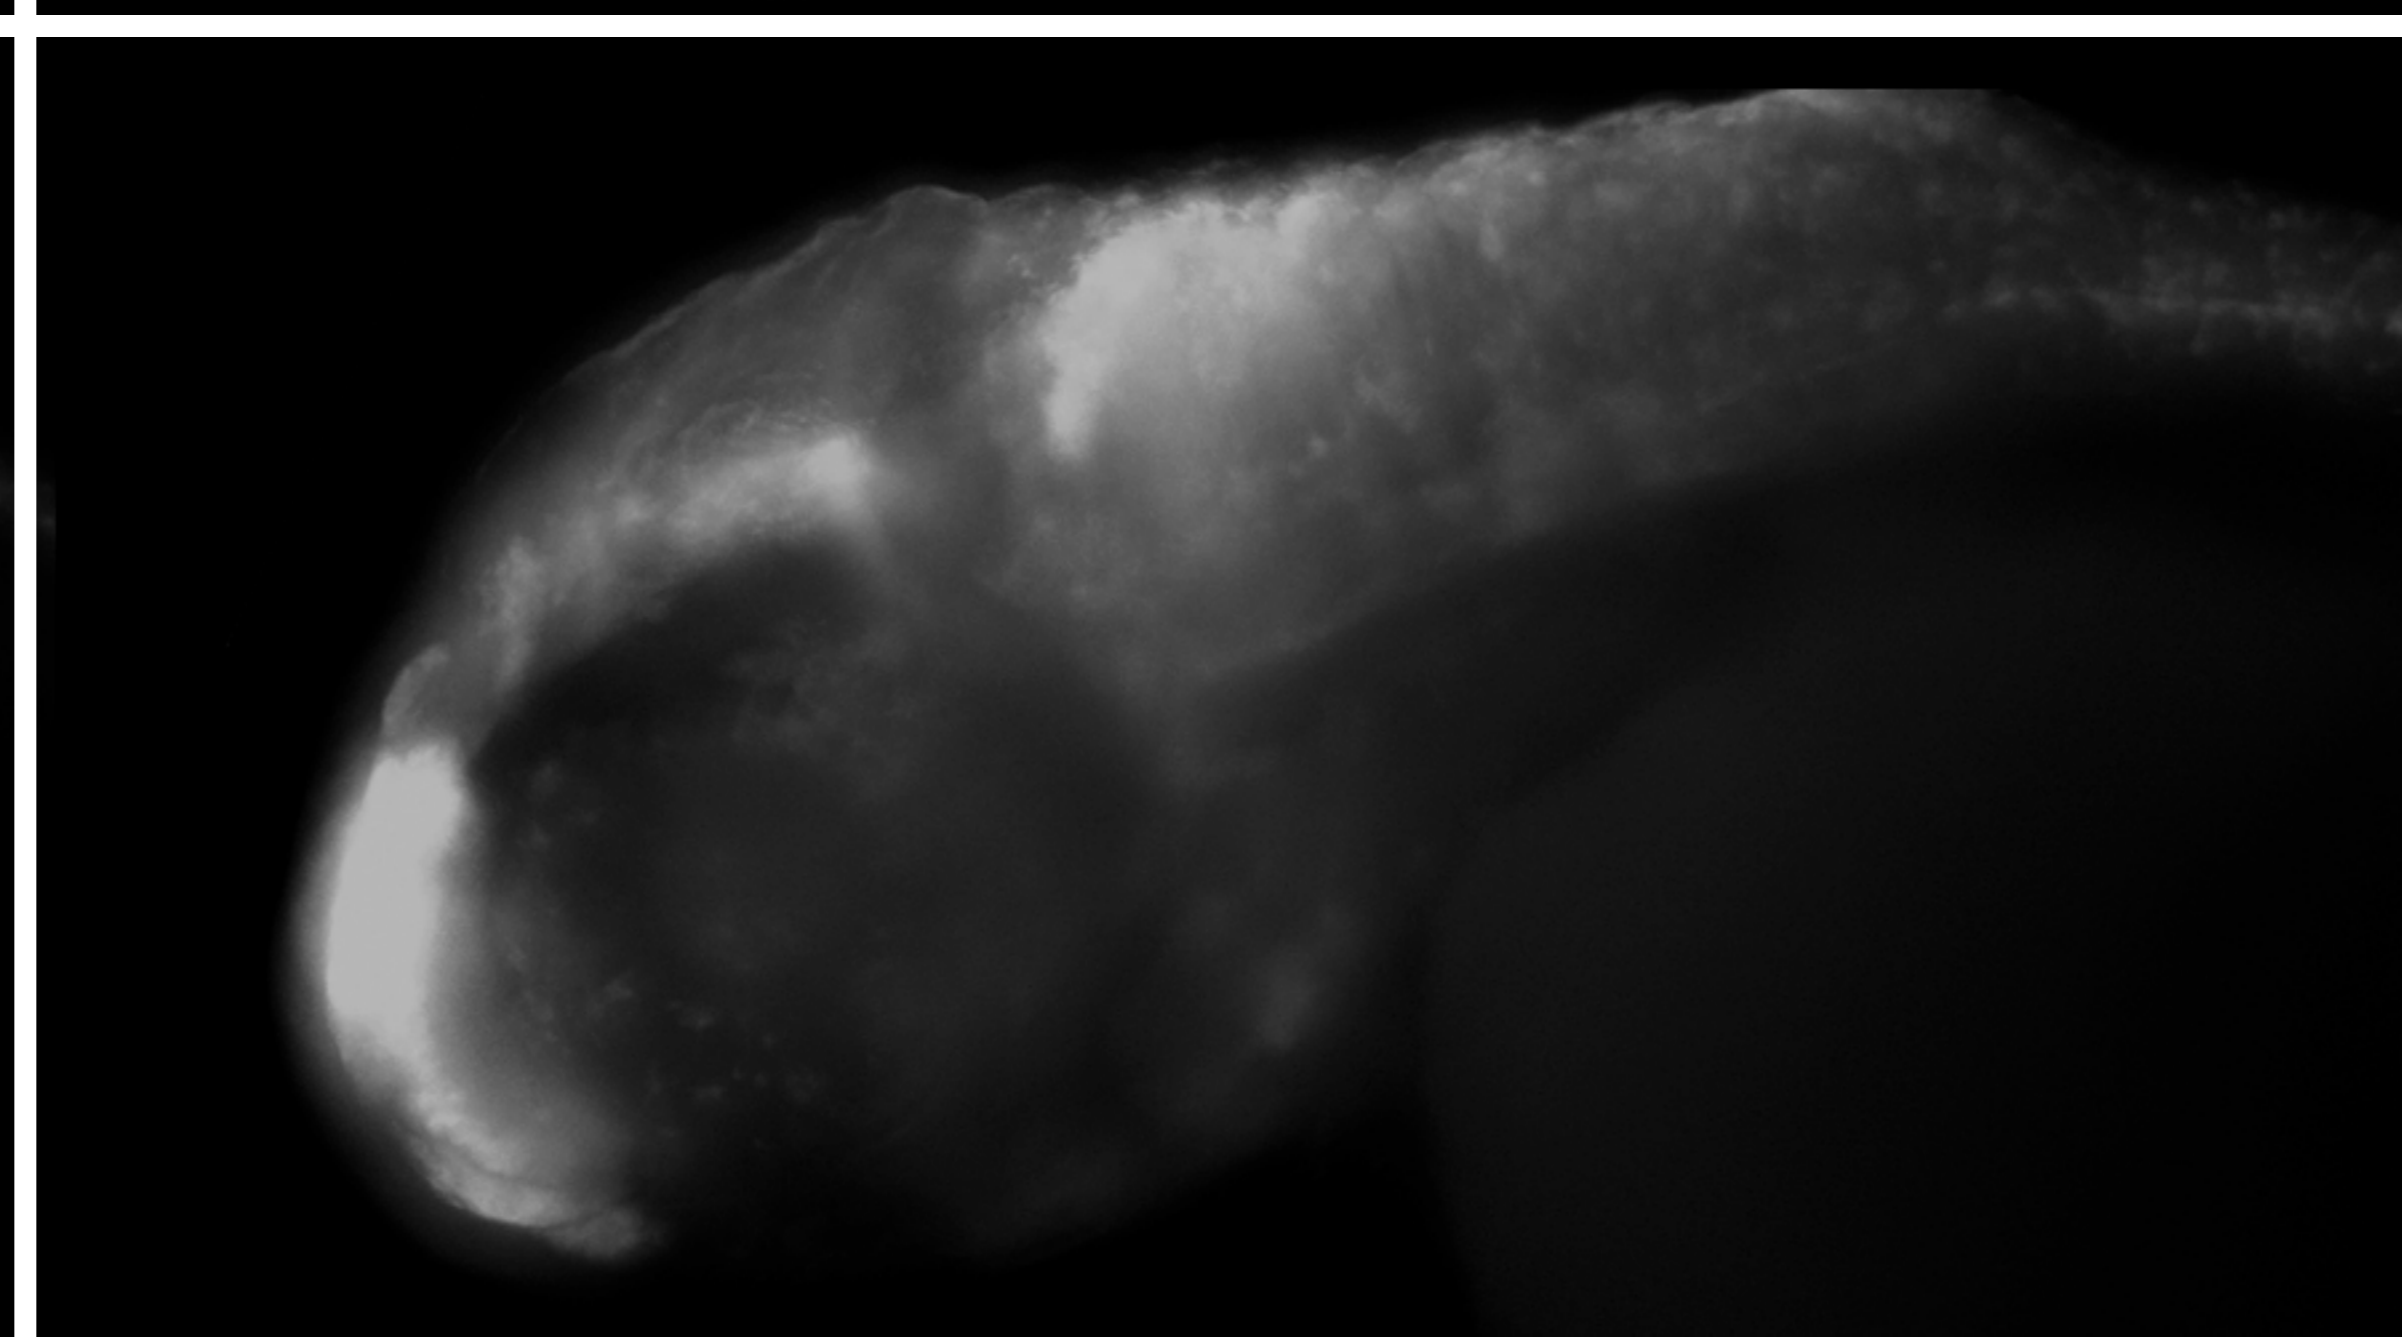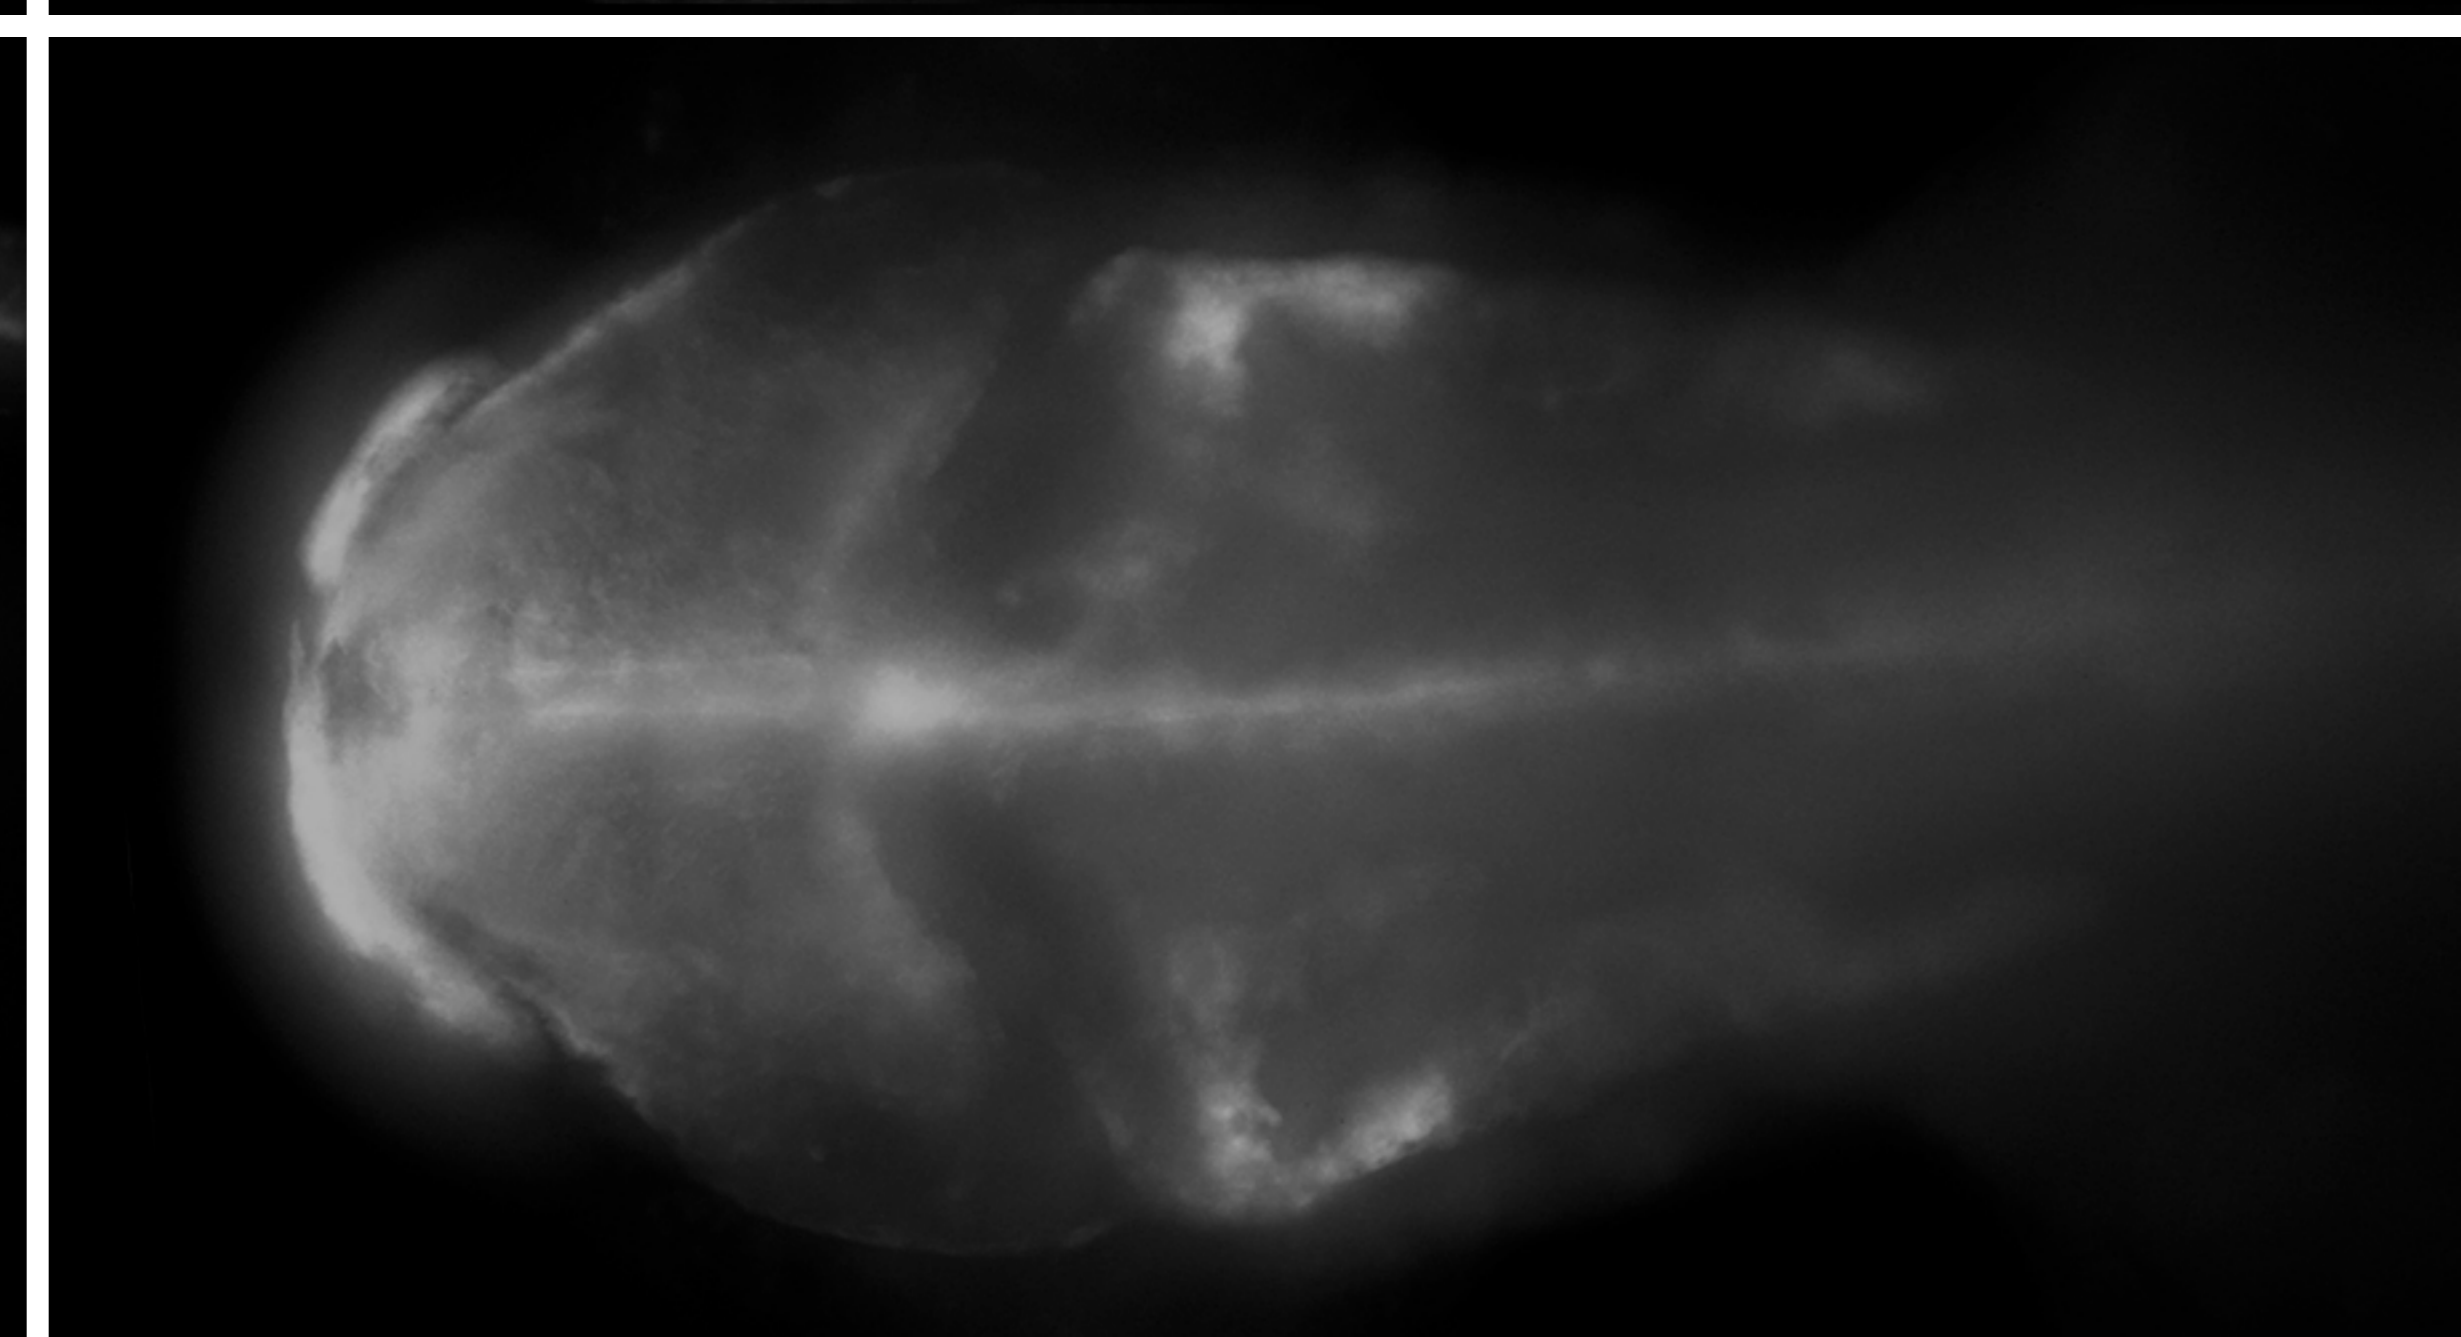

*Lmx1a\_117.21*

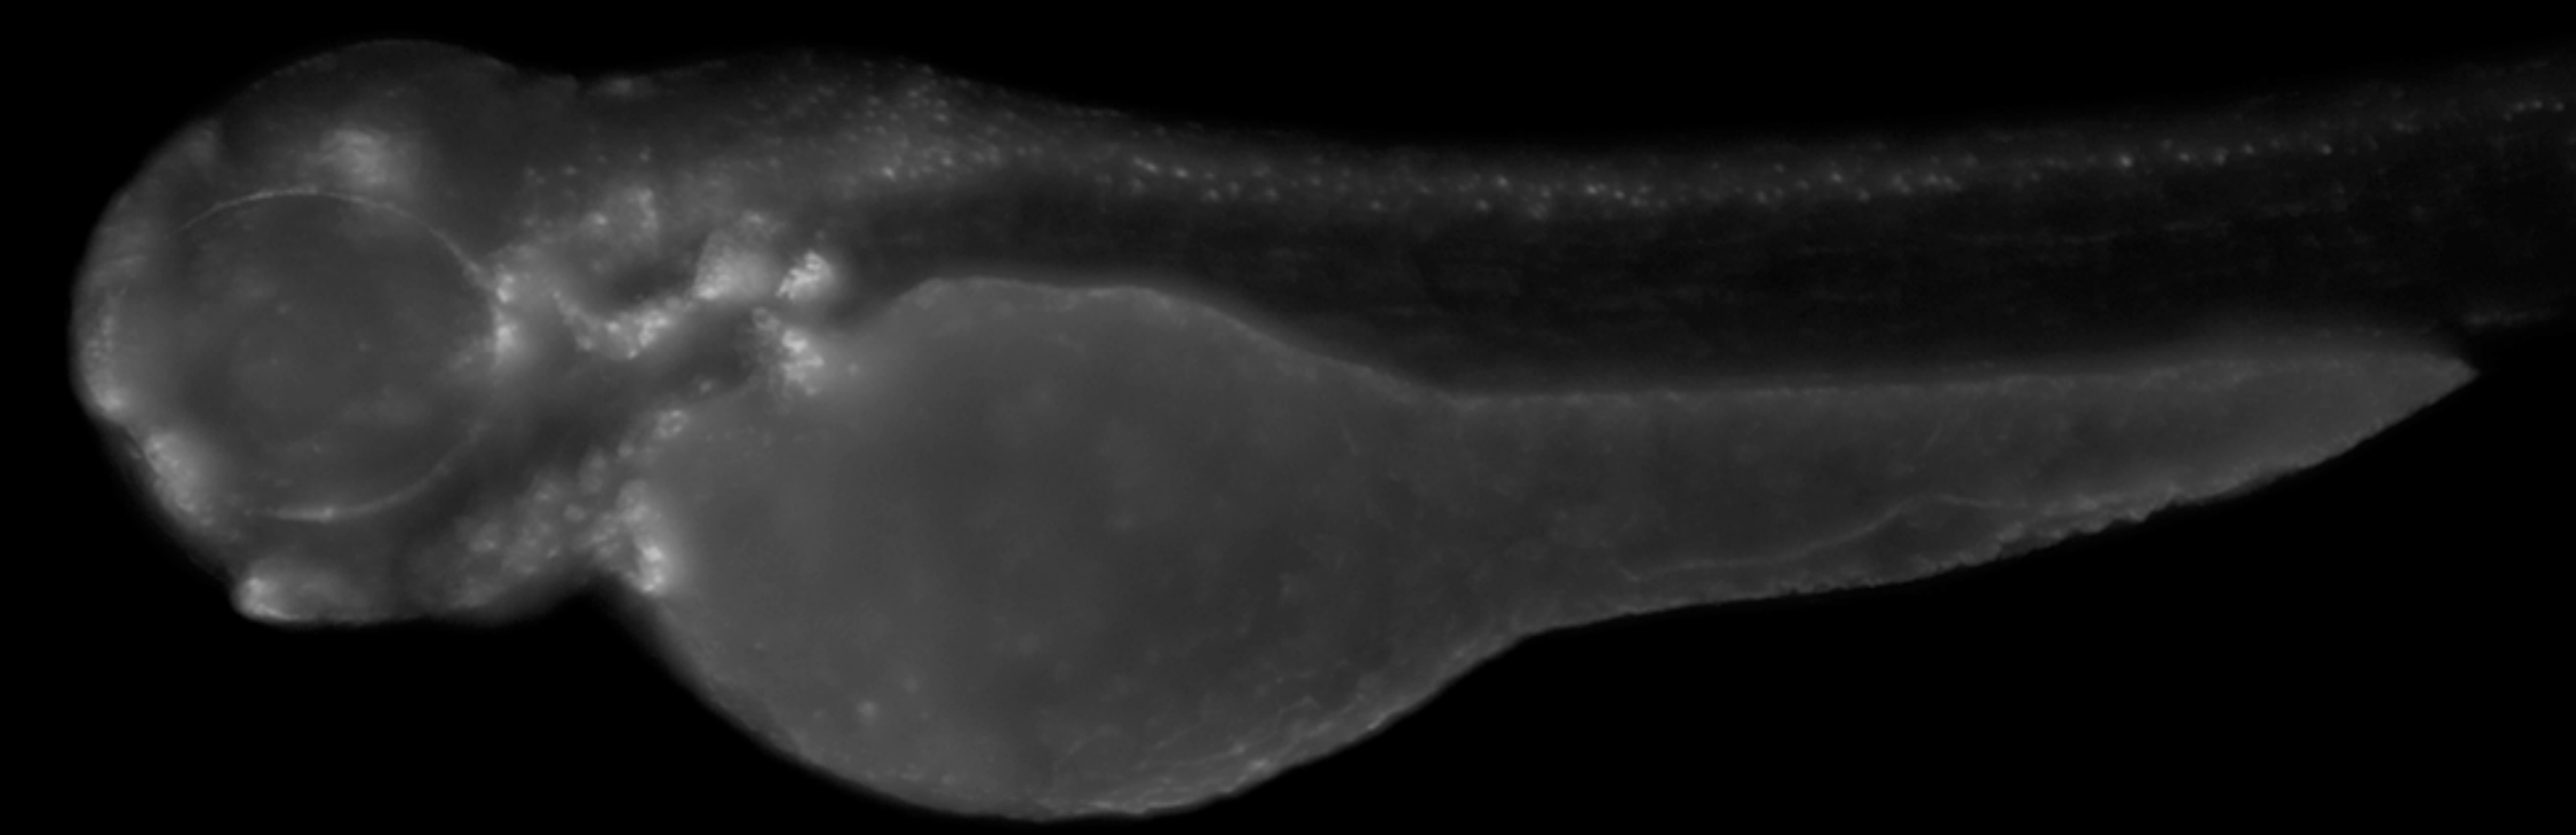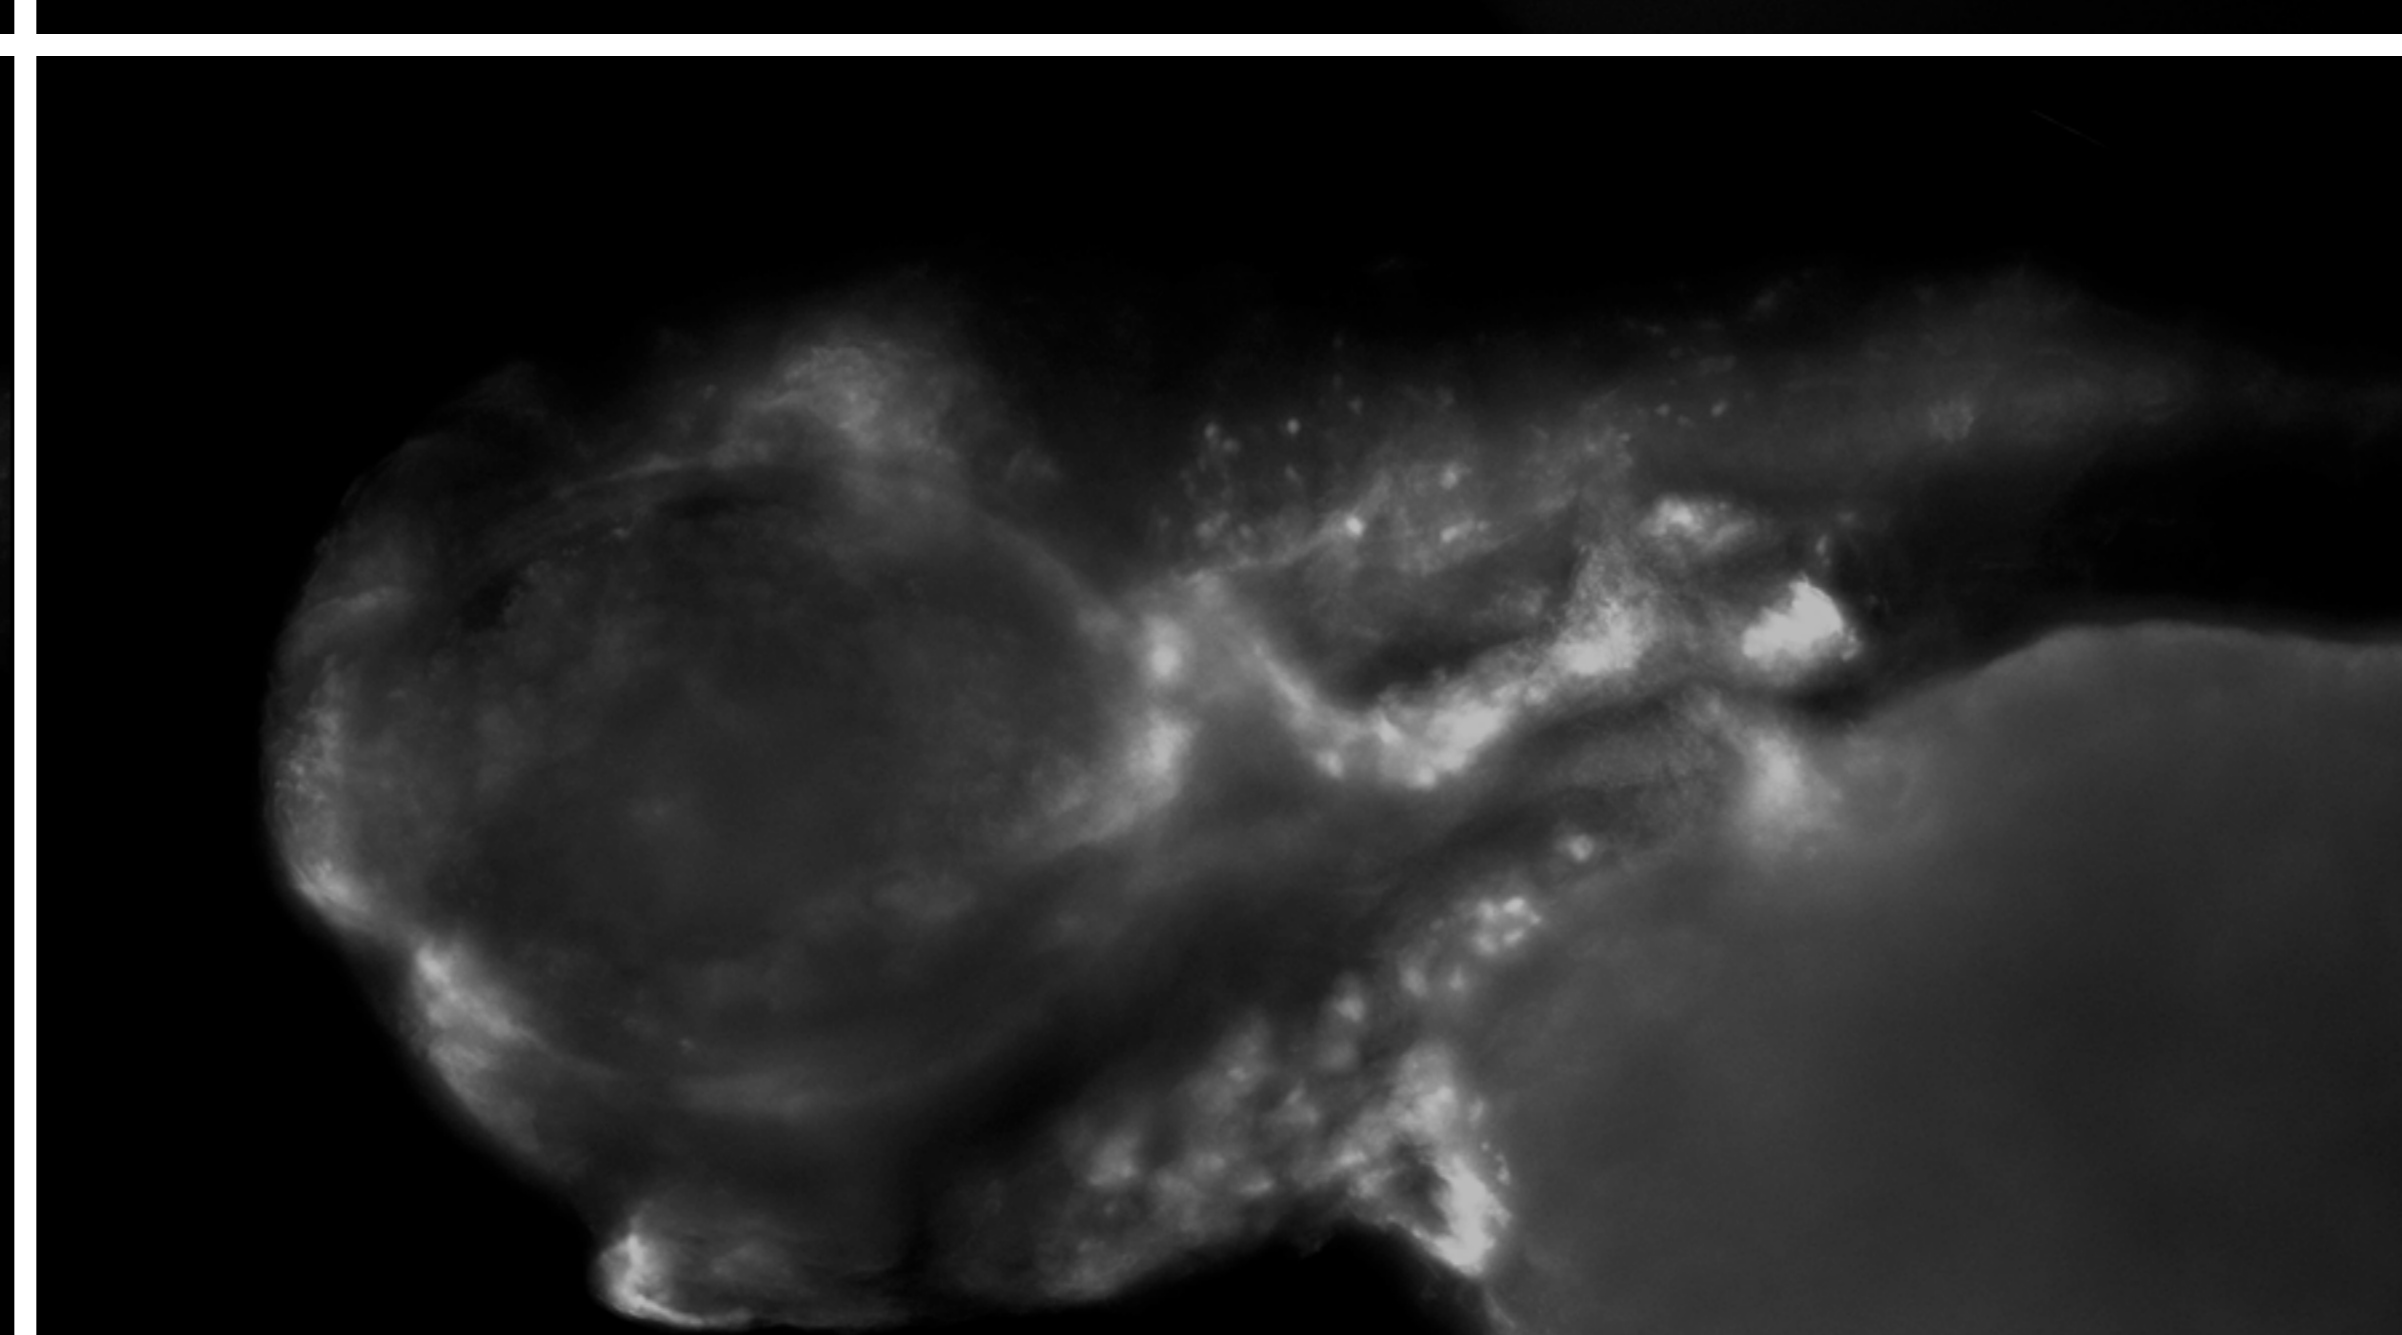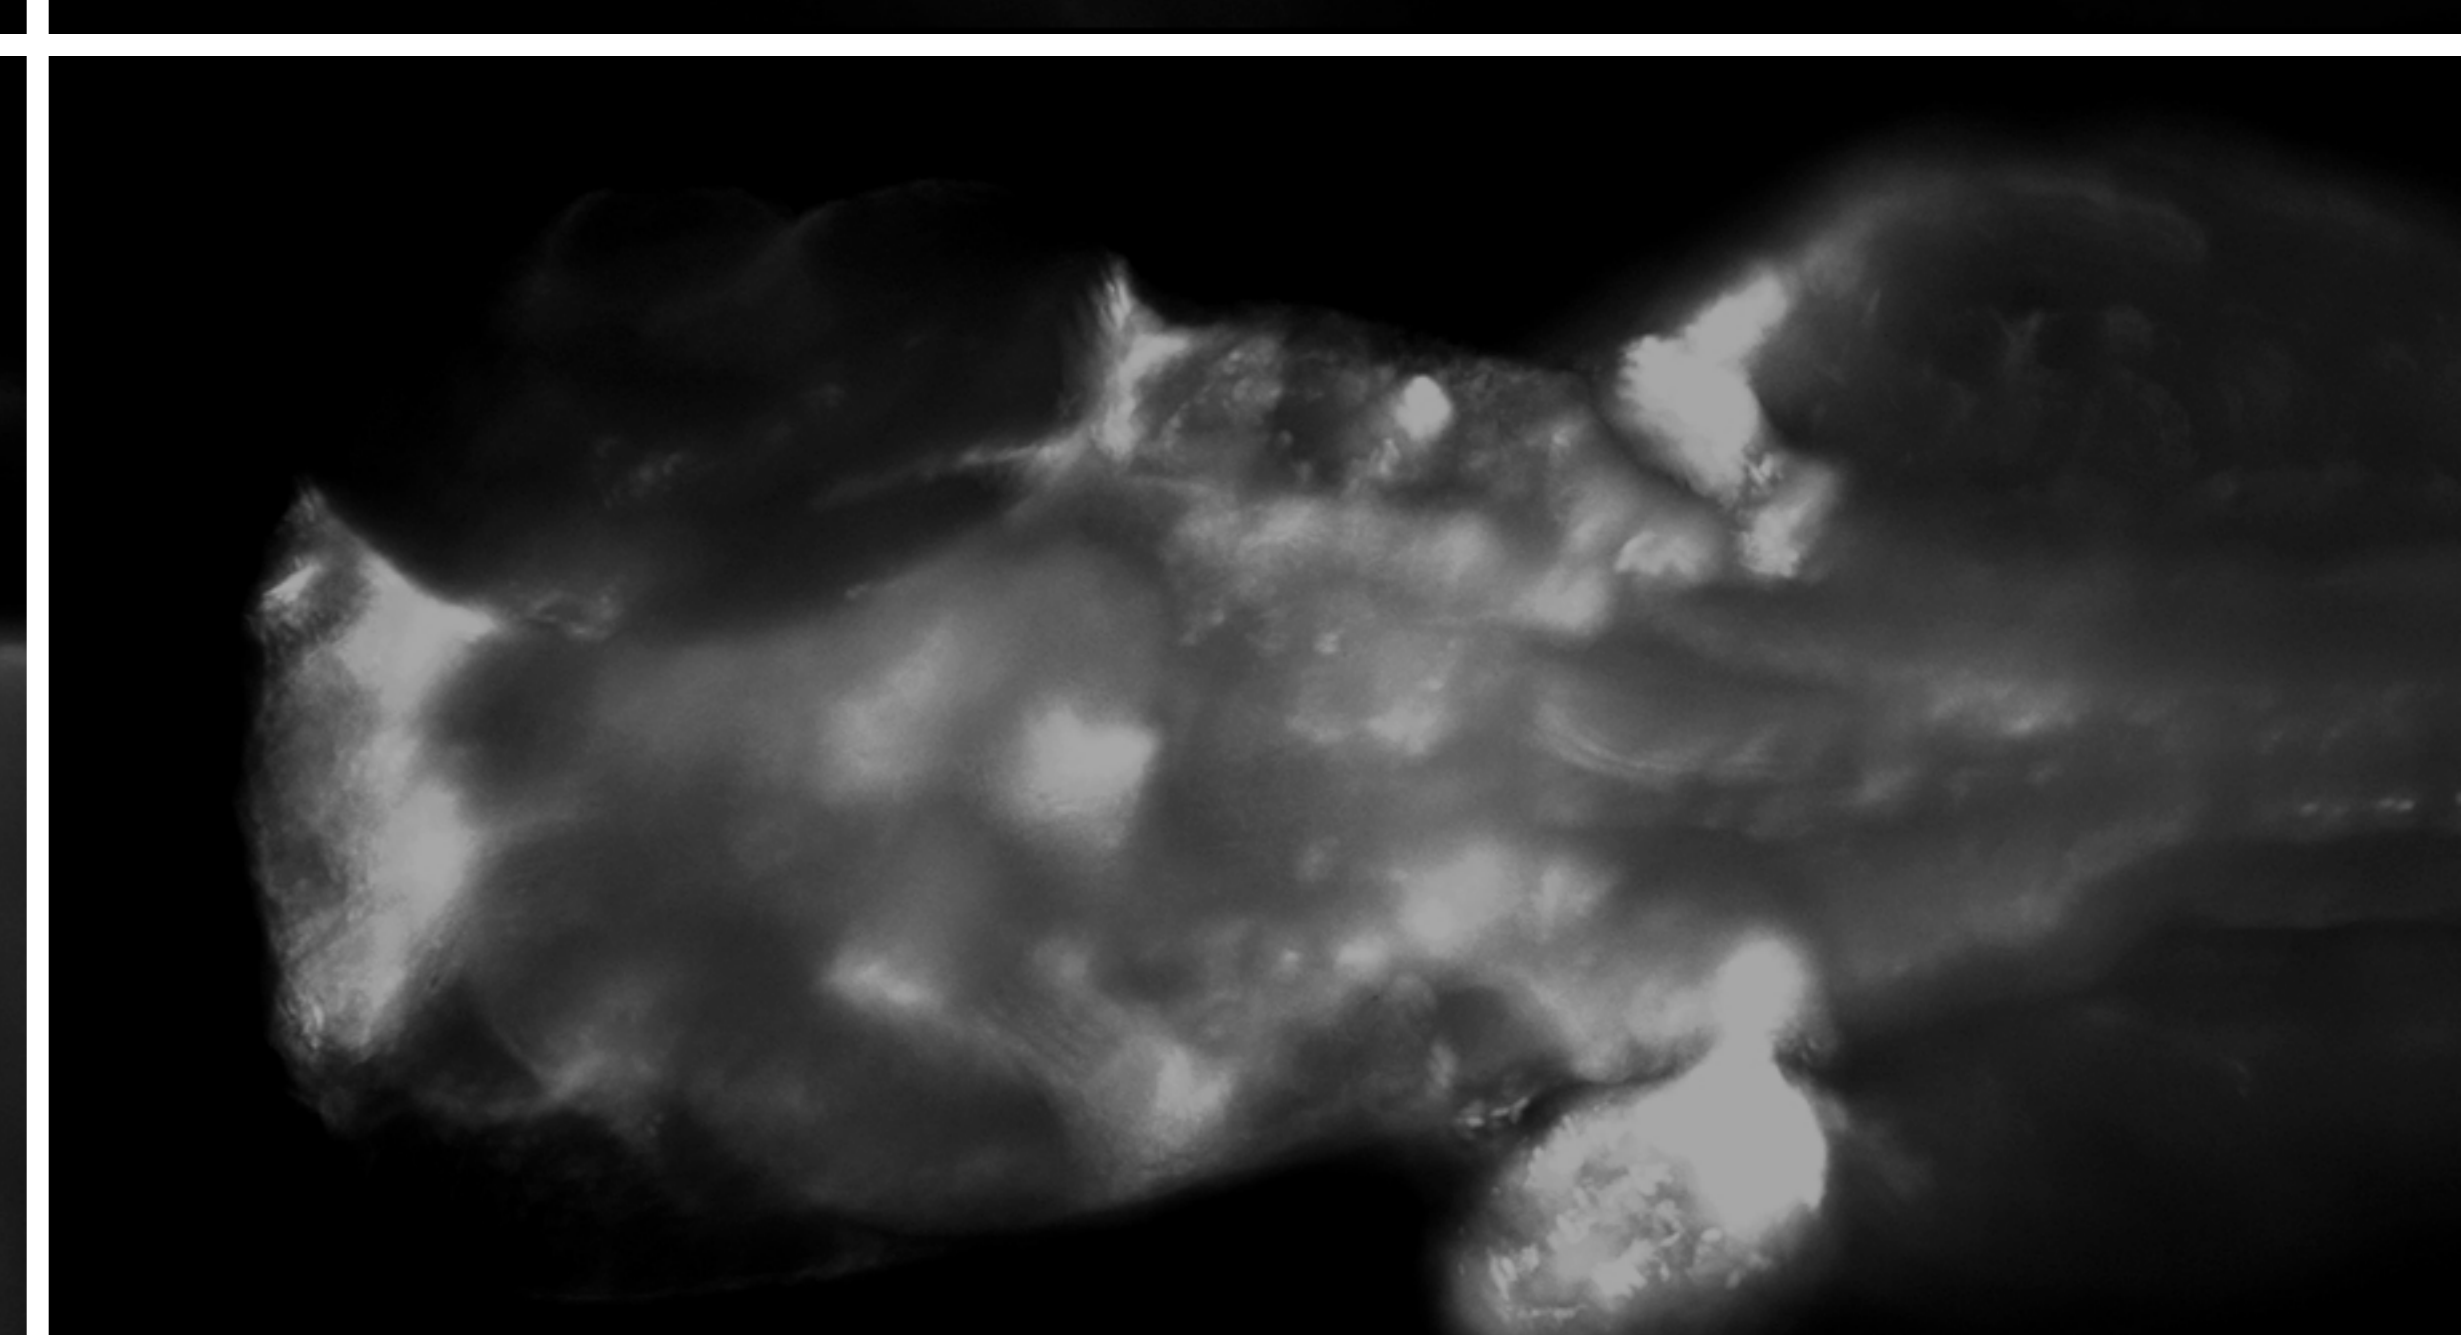

*Lmx1a\_135.15*

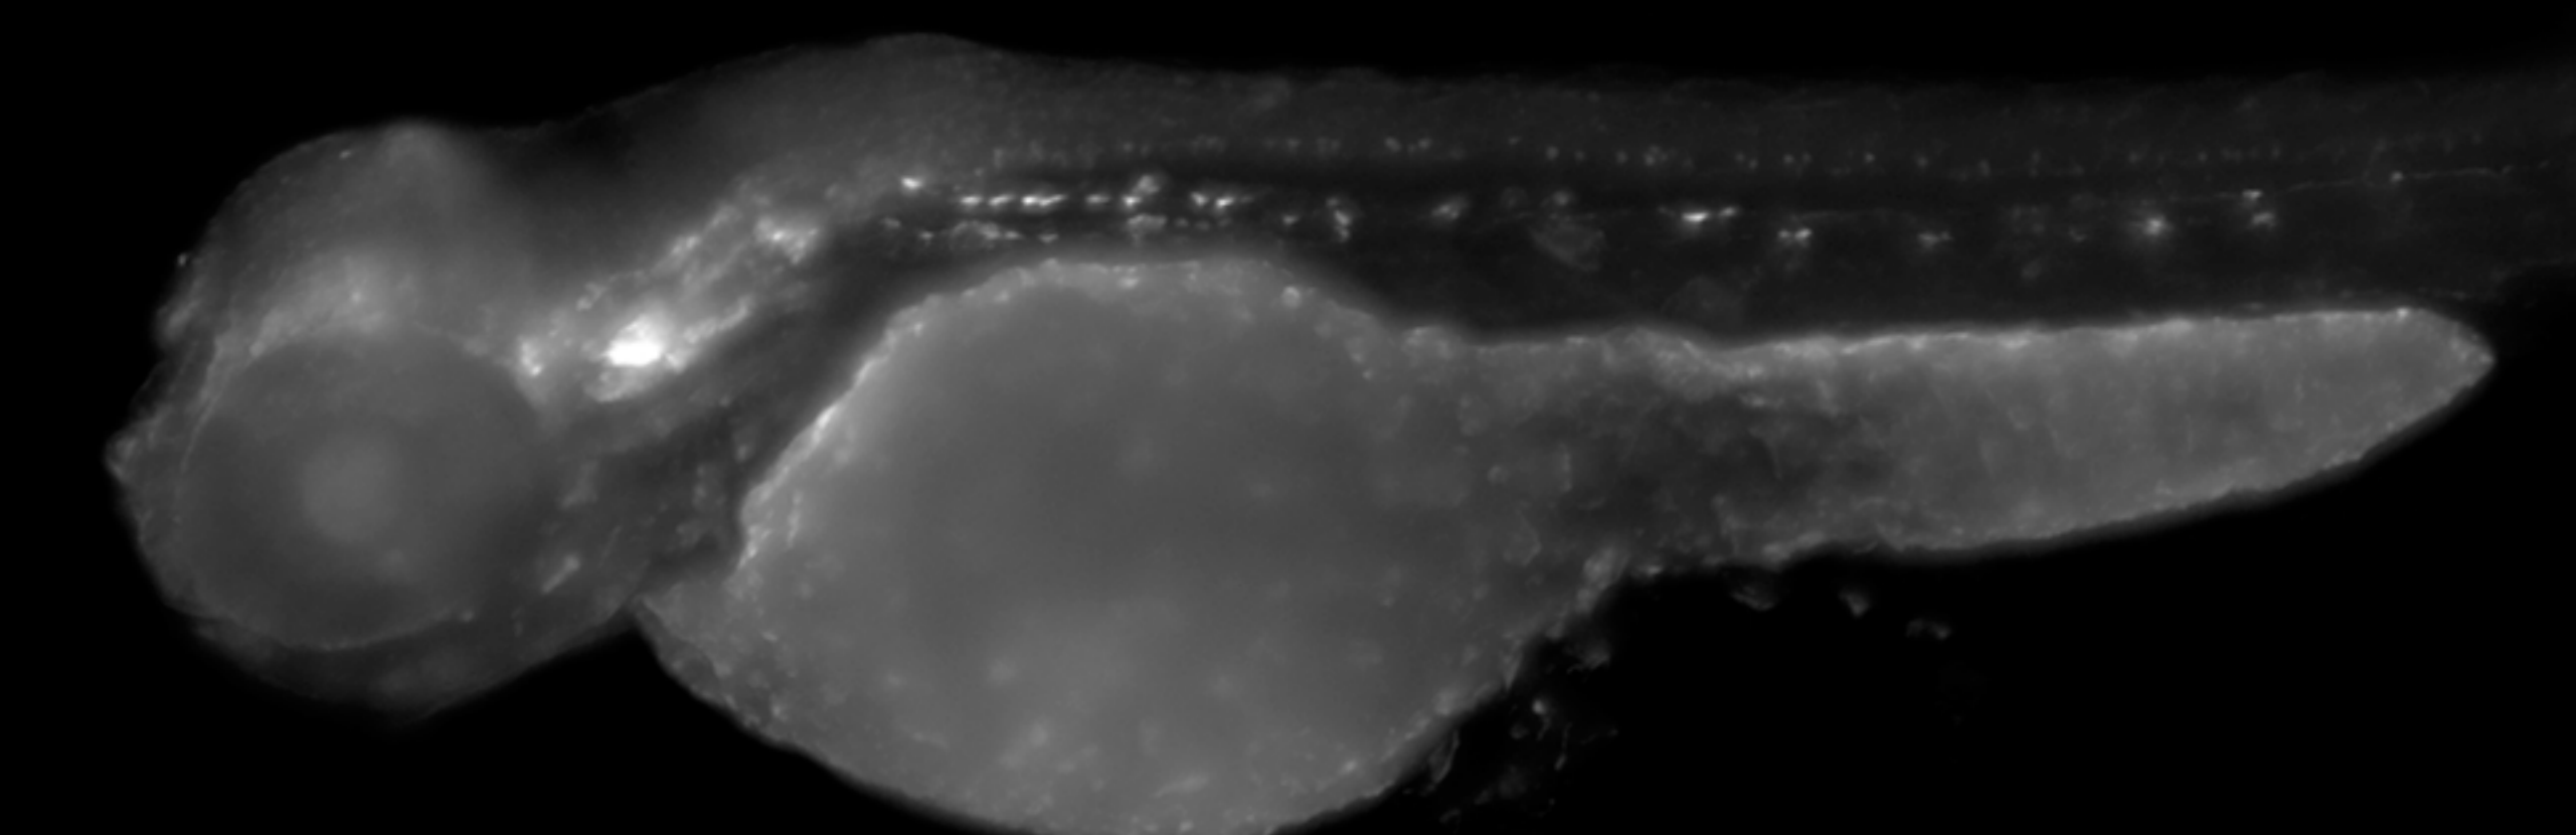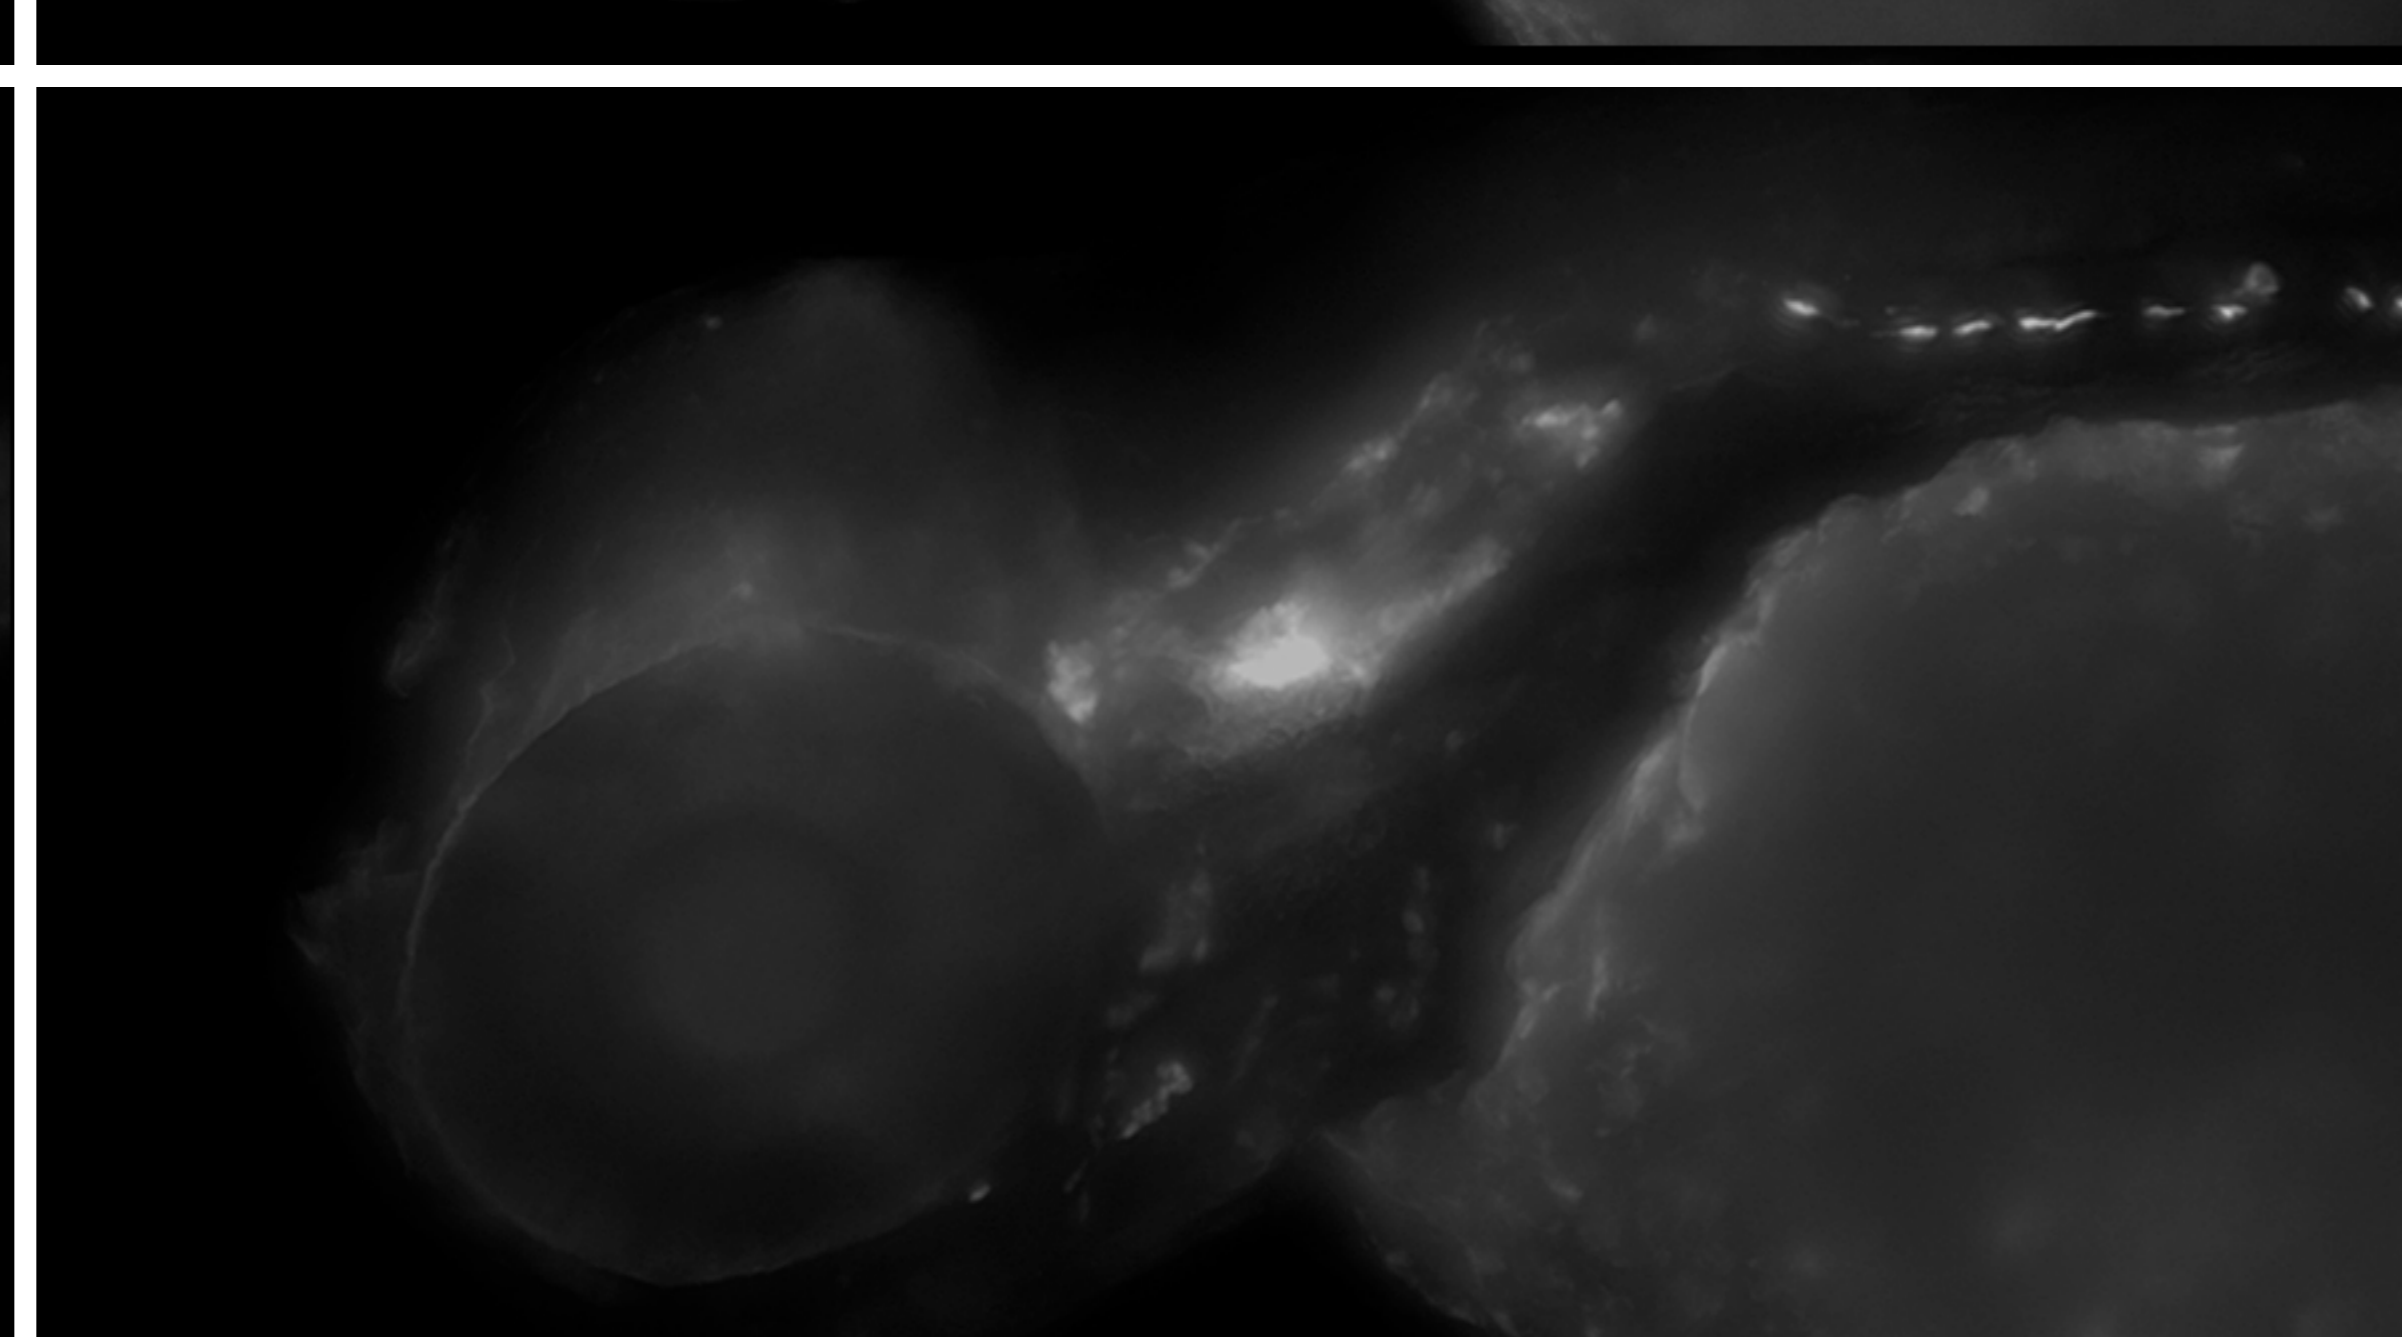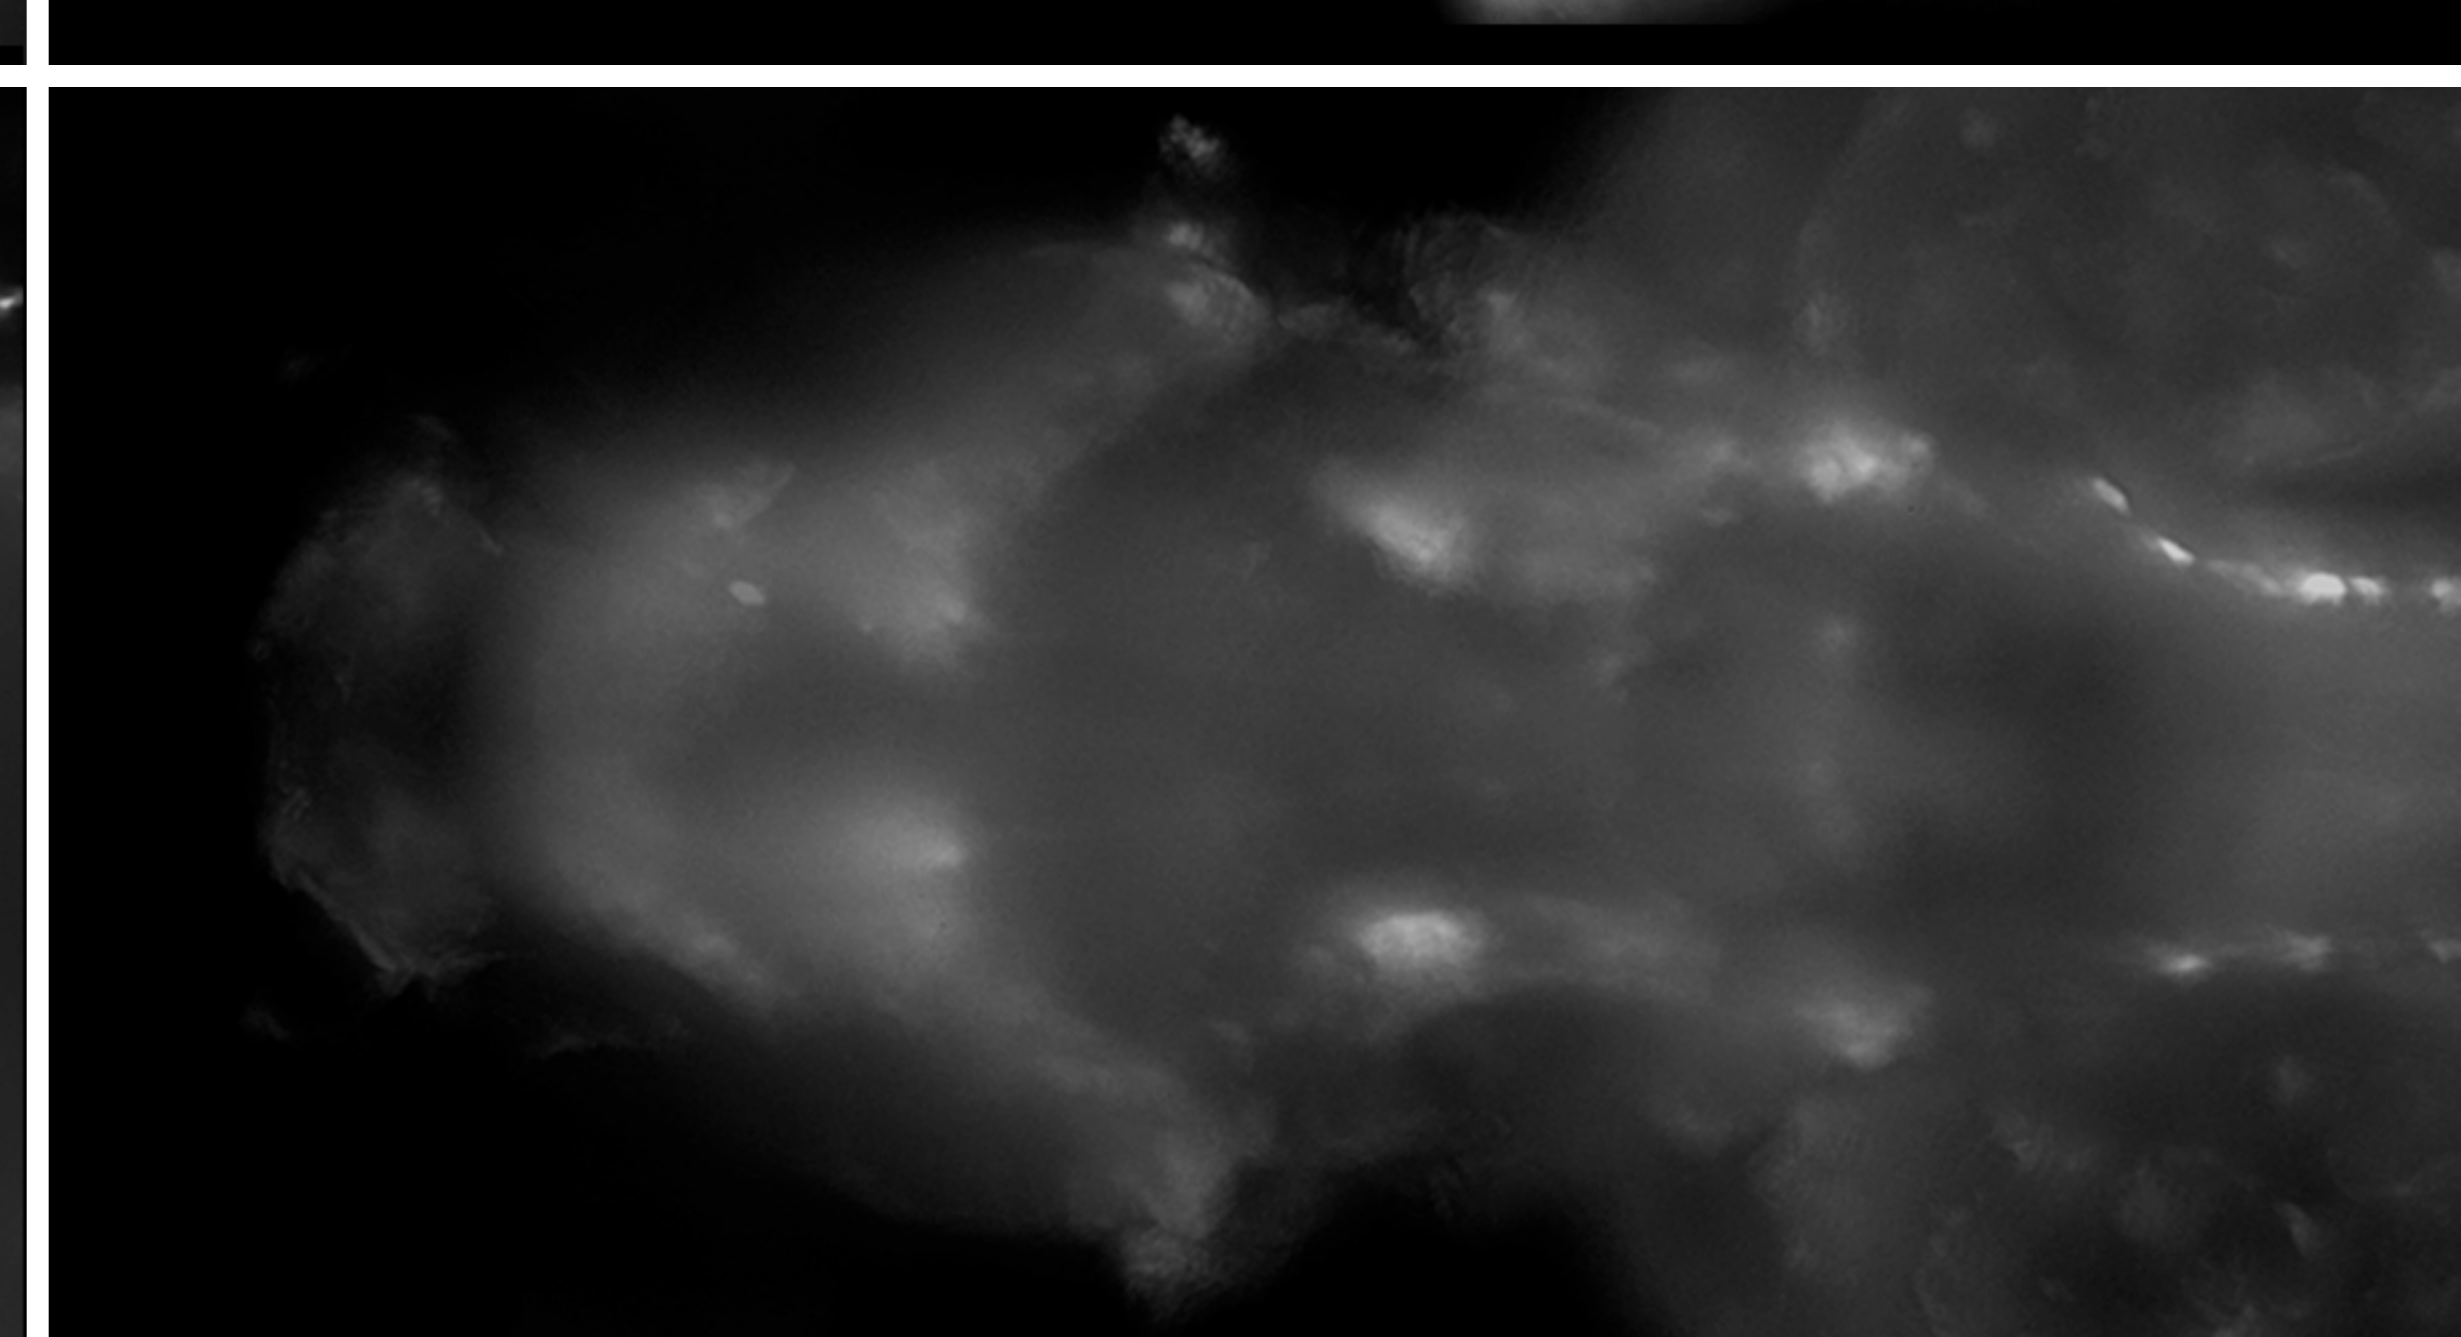

Supplement: NIHMS515584-supplement-438_2013_771_MOESM2_ESM.pdf [file NIHMS515584-supplement-438_2013_771_MOESM2_ESM.pdf]

*Lmx1a\_187.31*

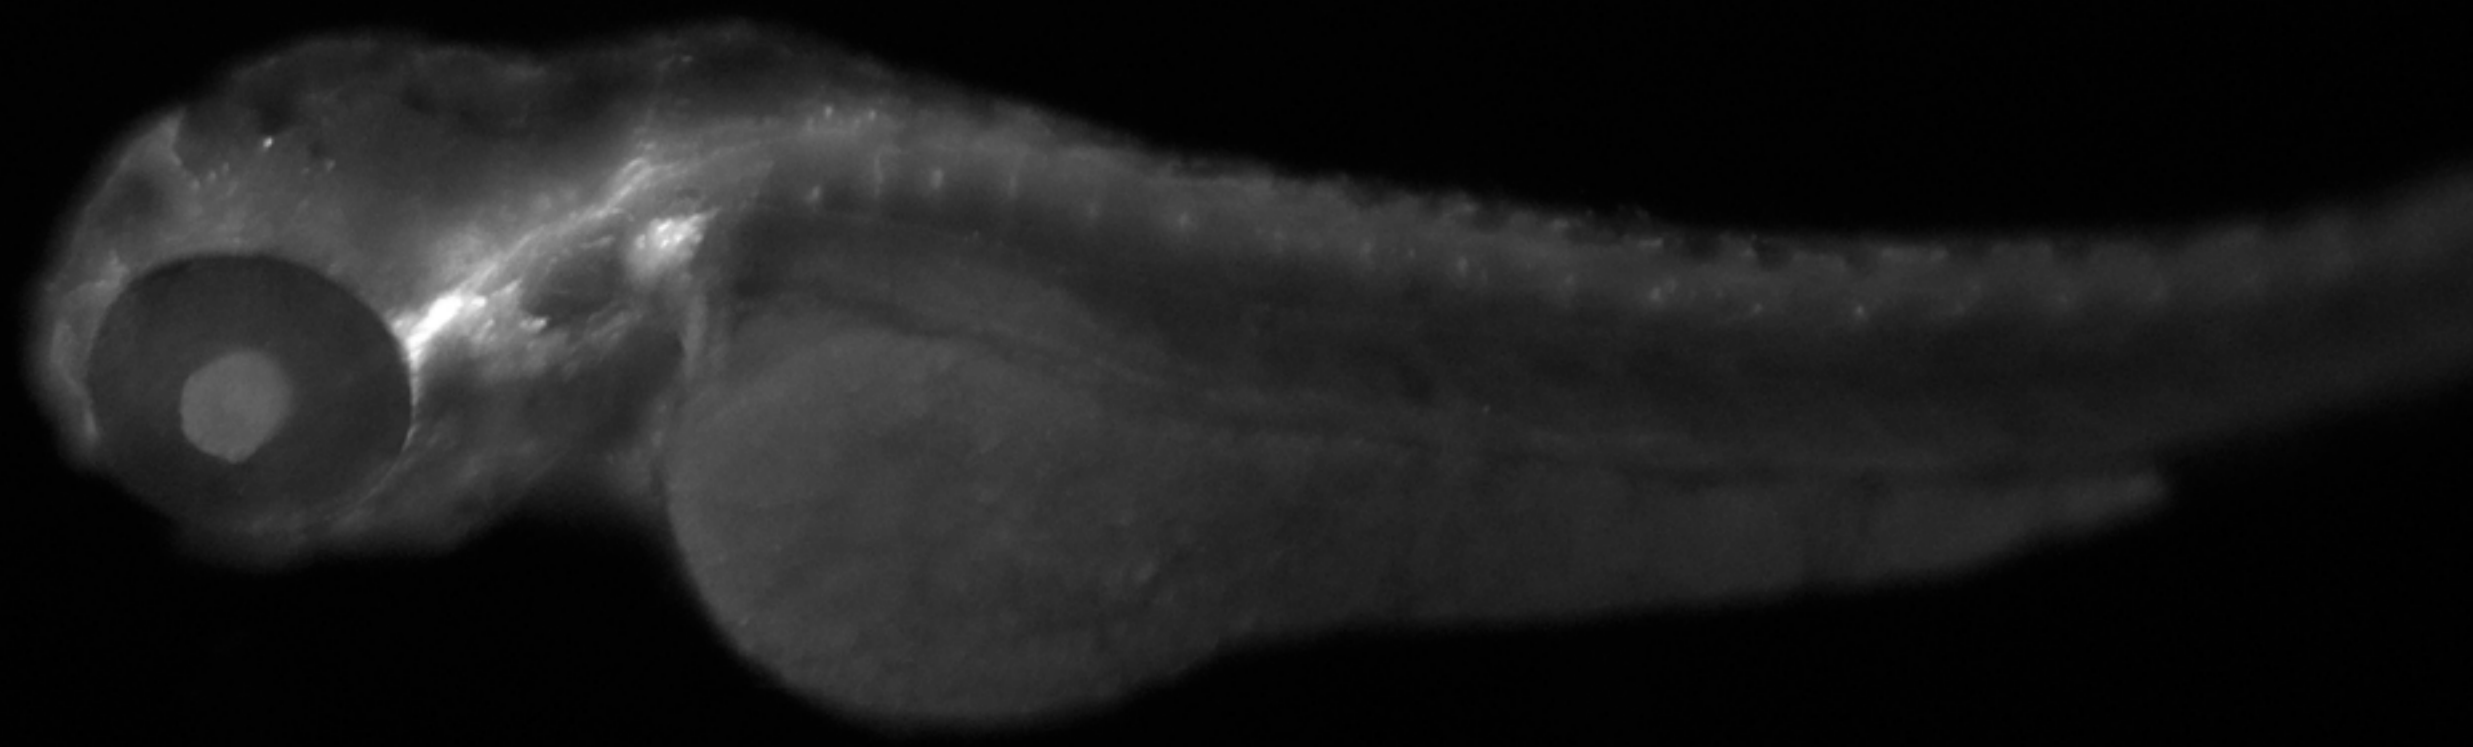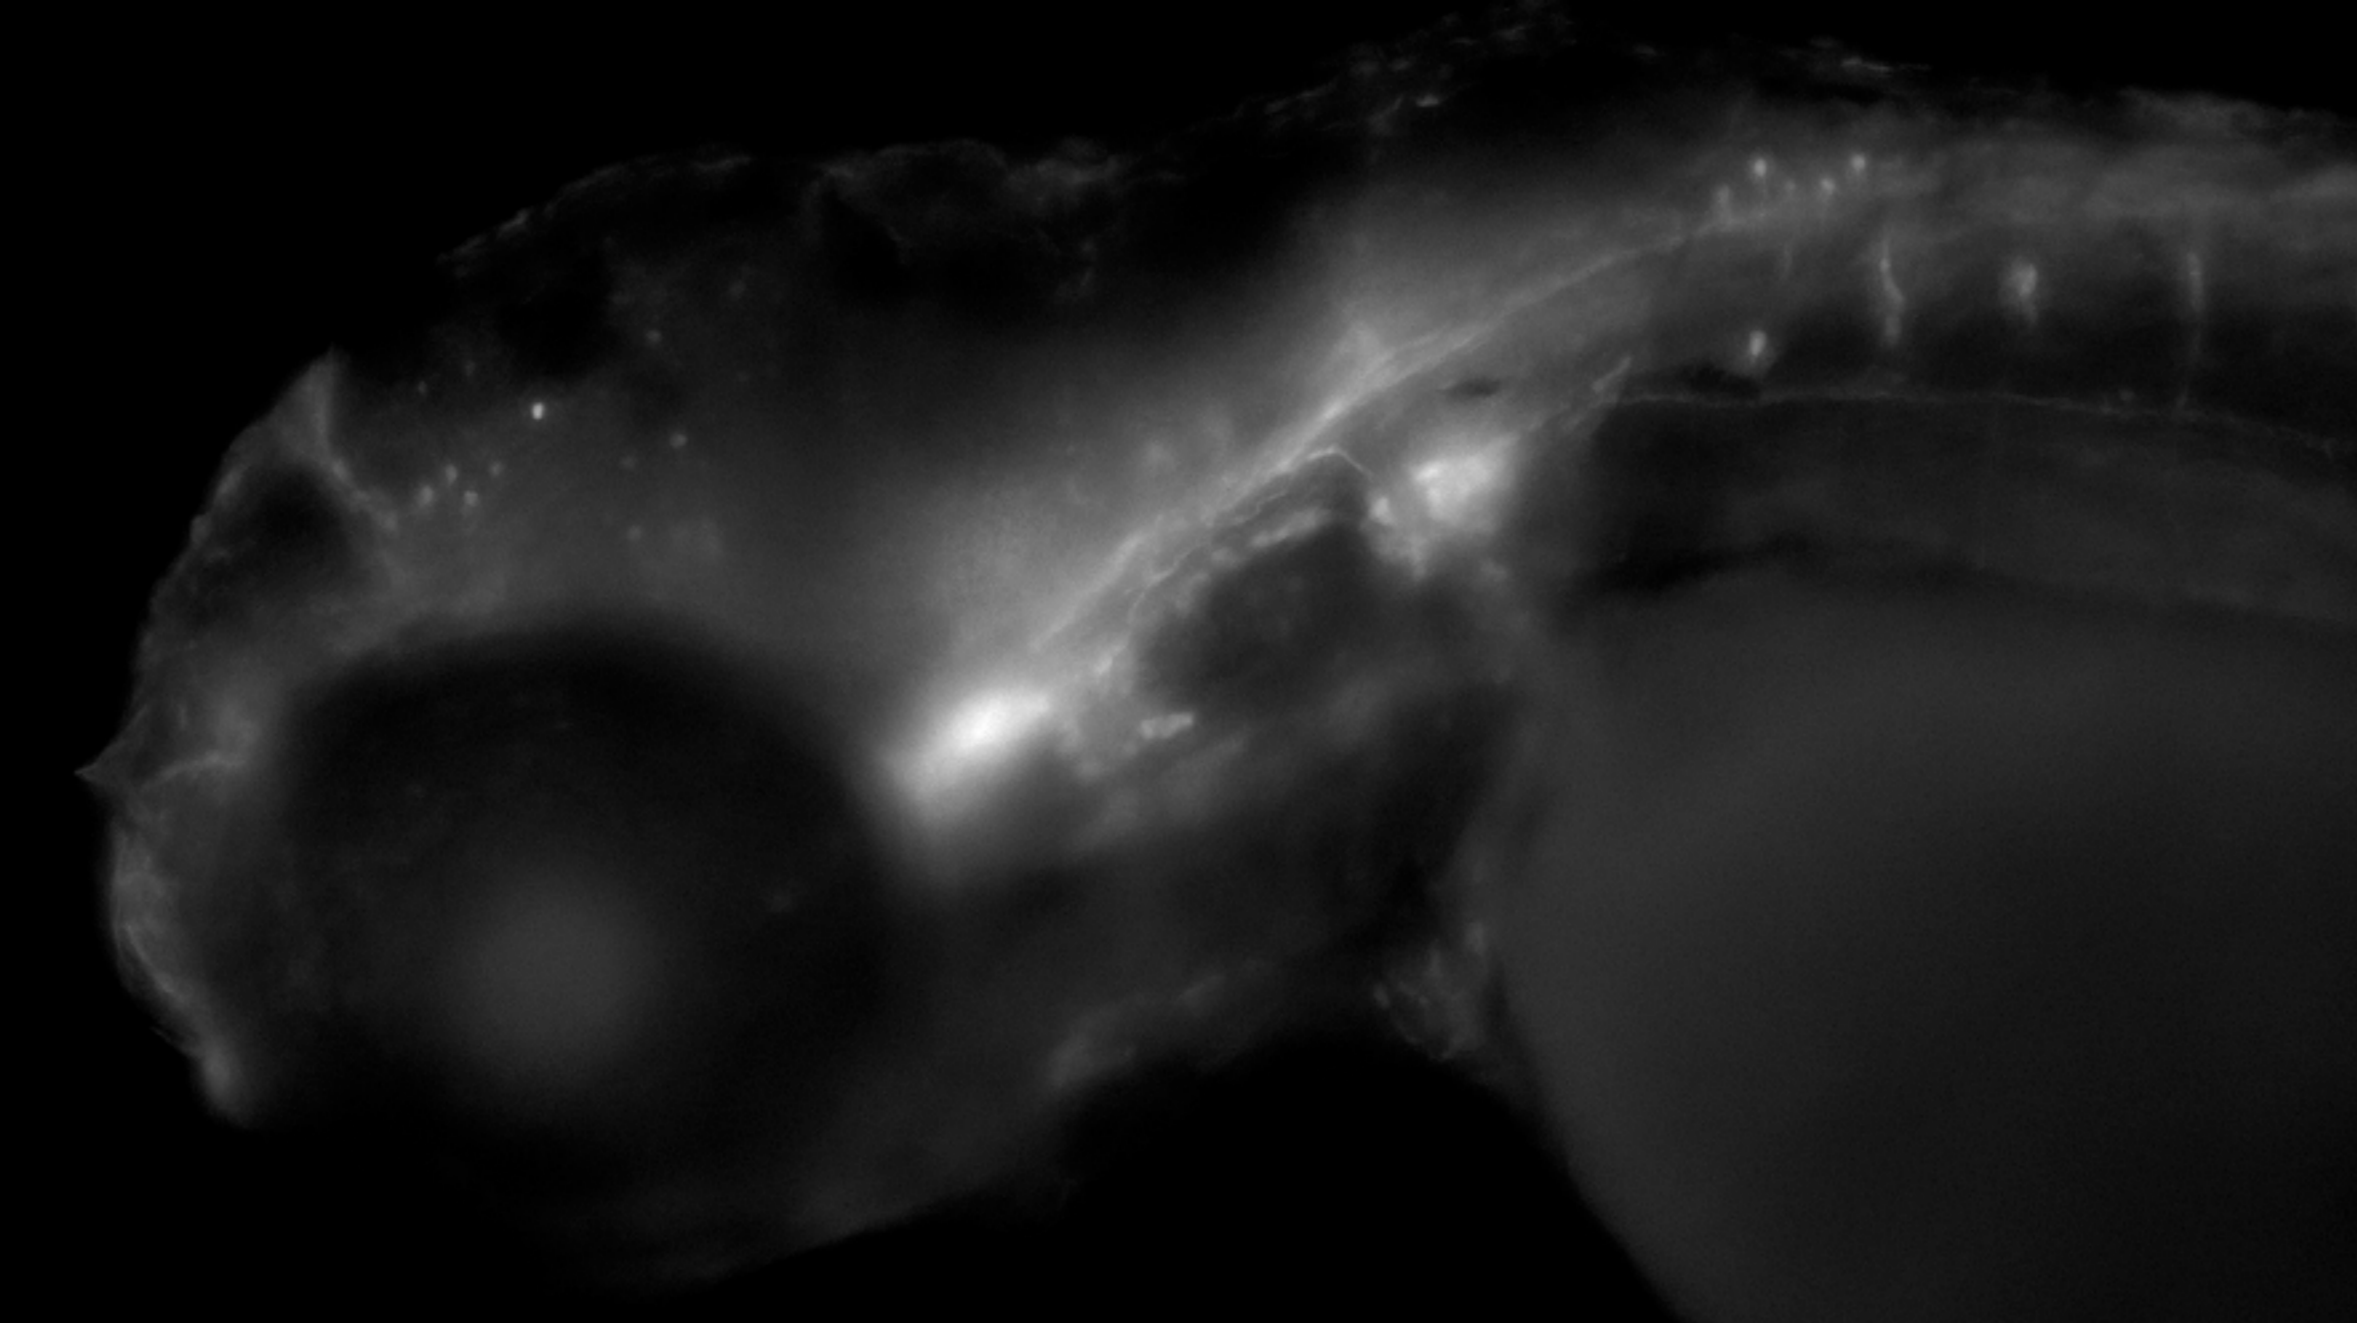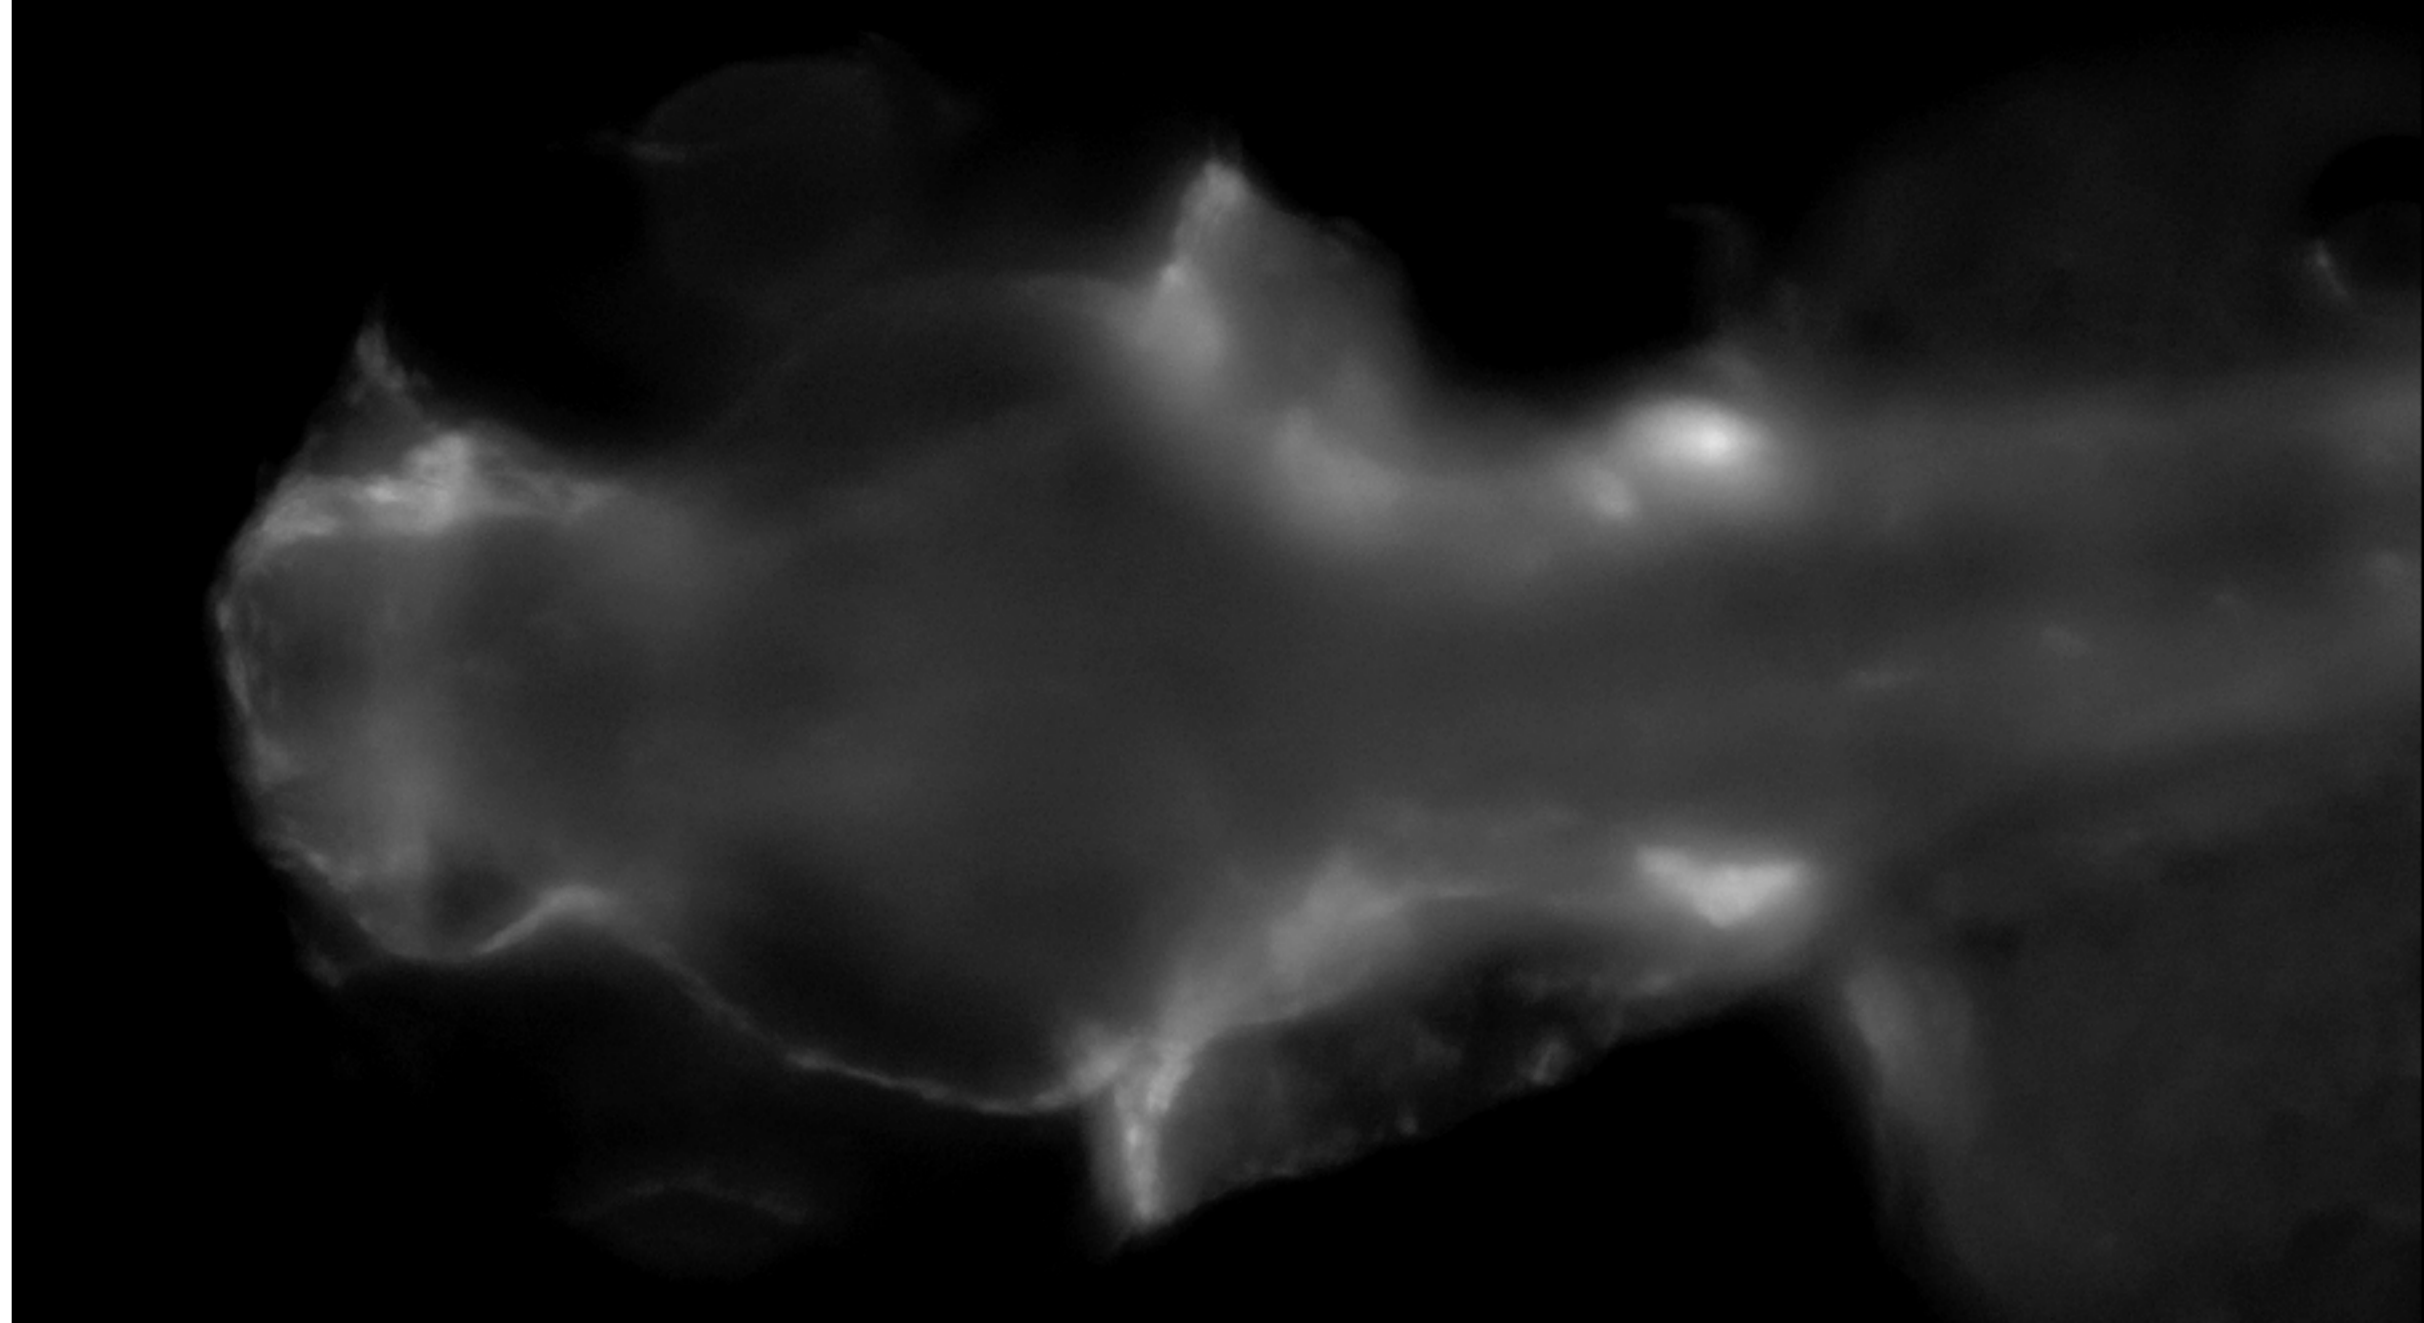

*Lmx1a\_238.85*

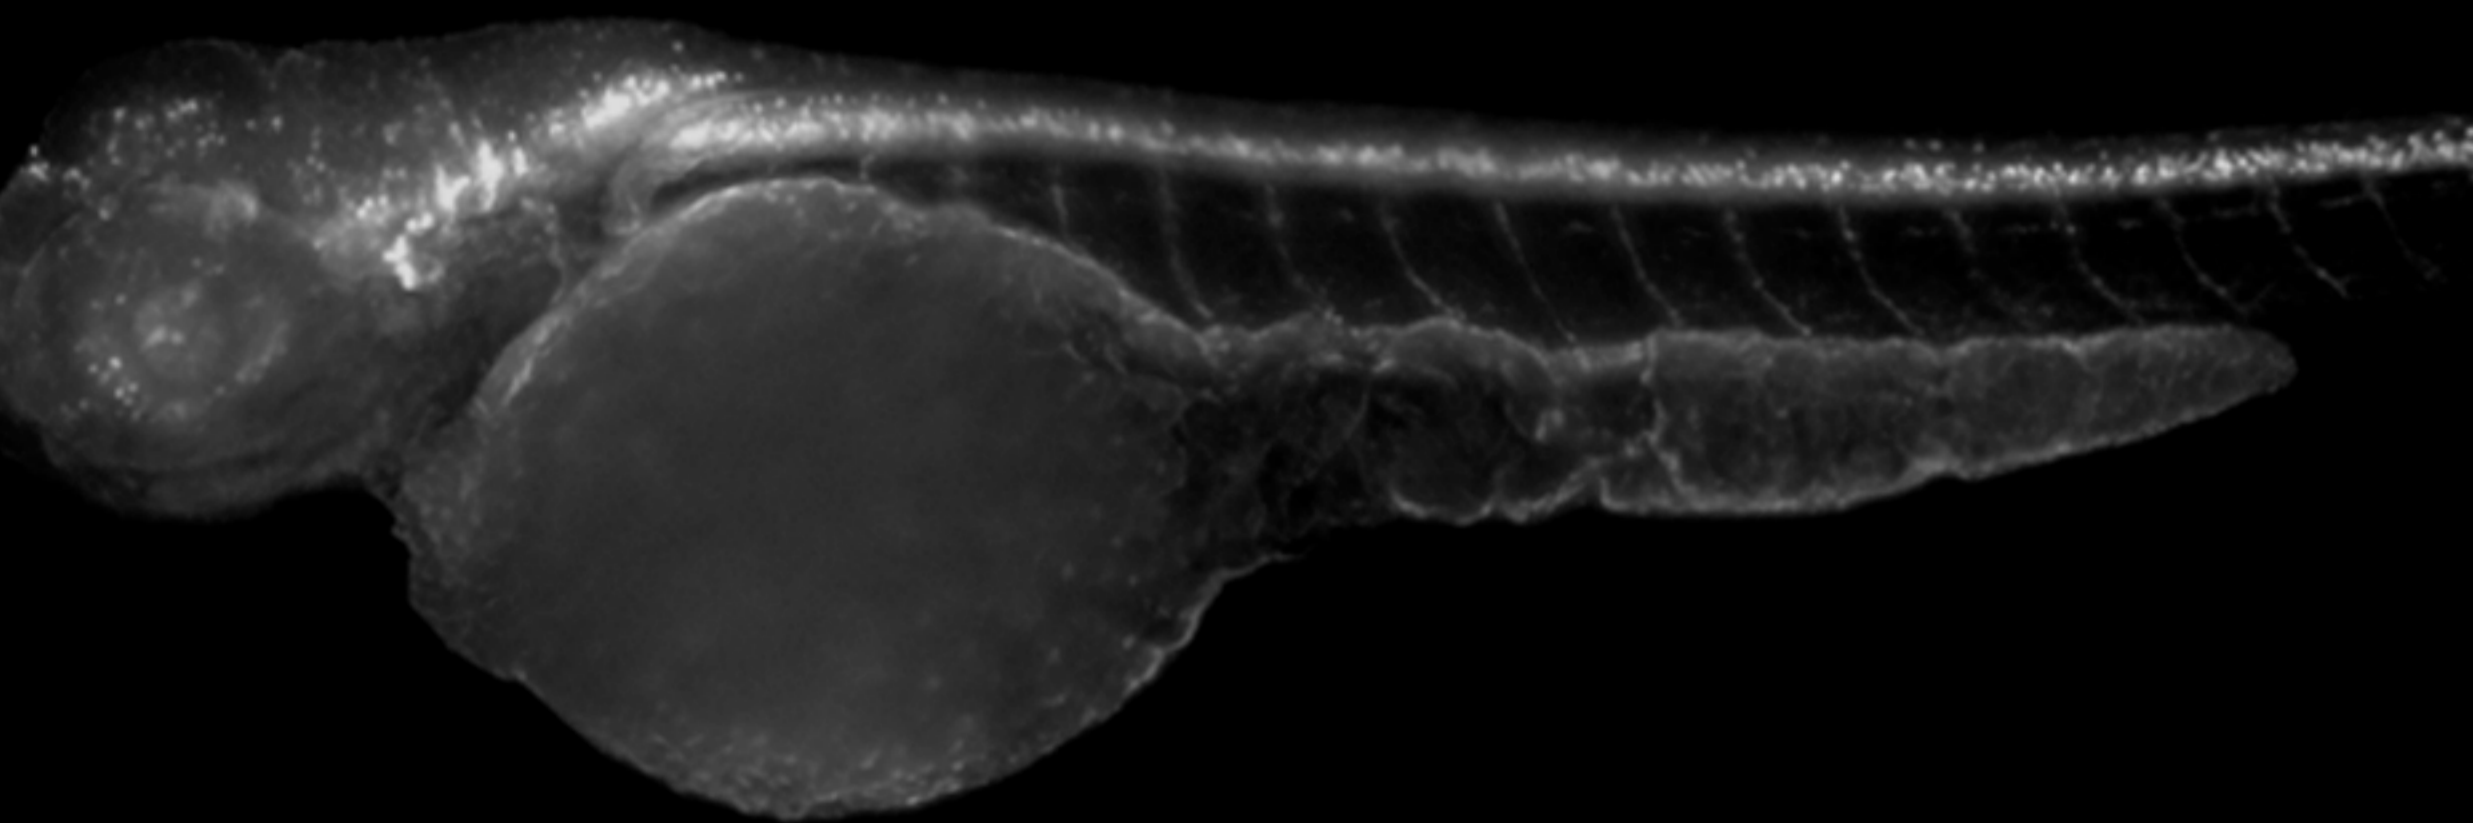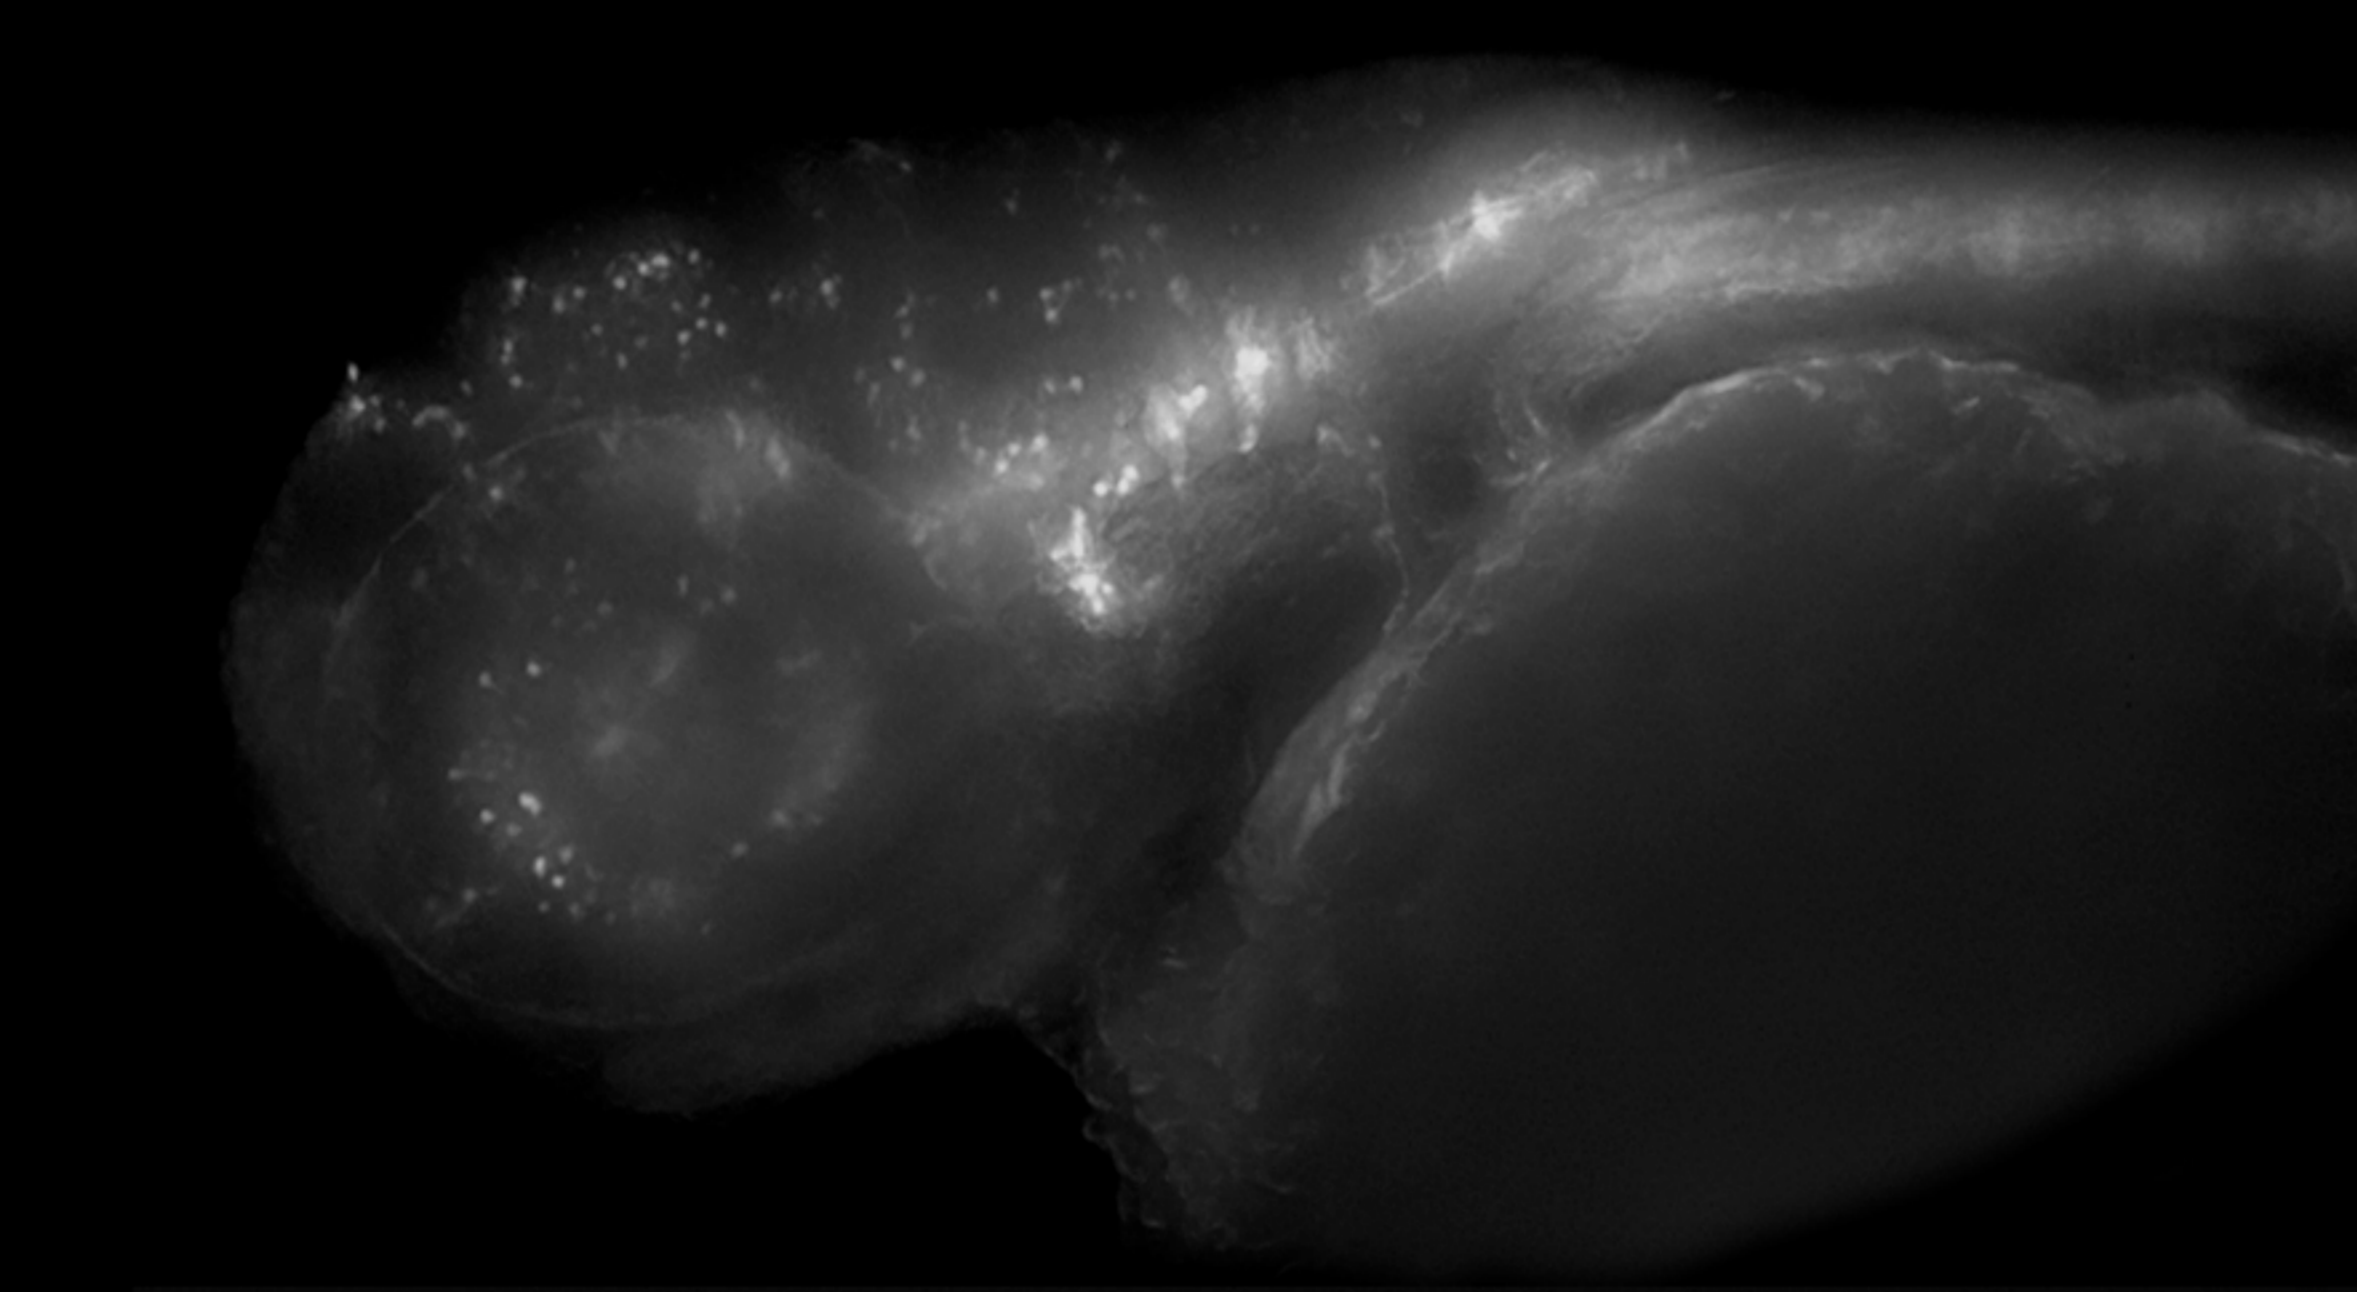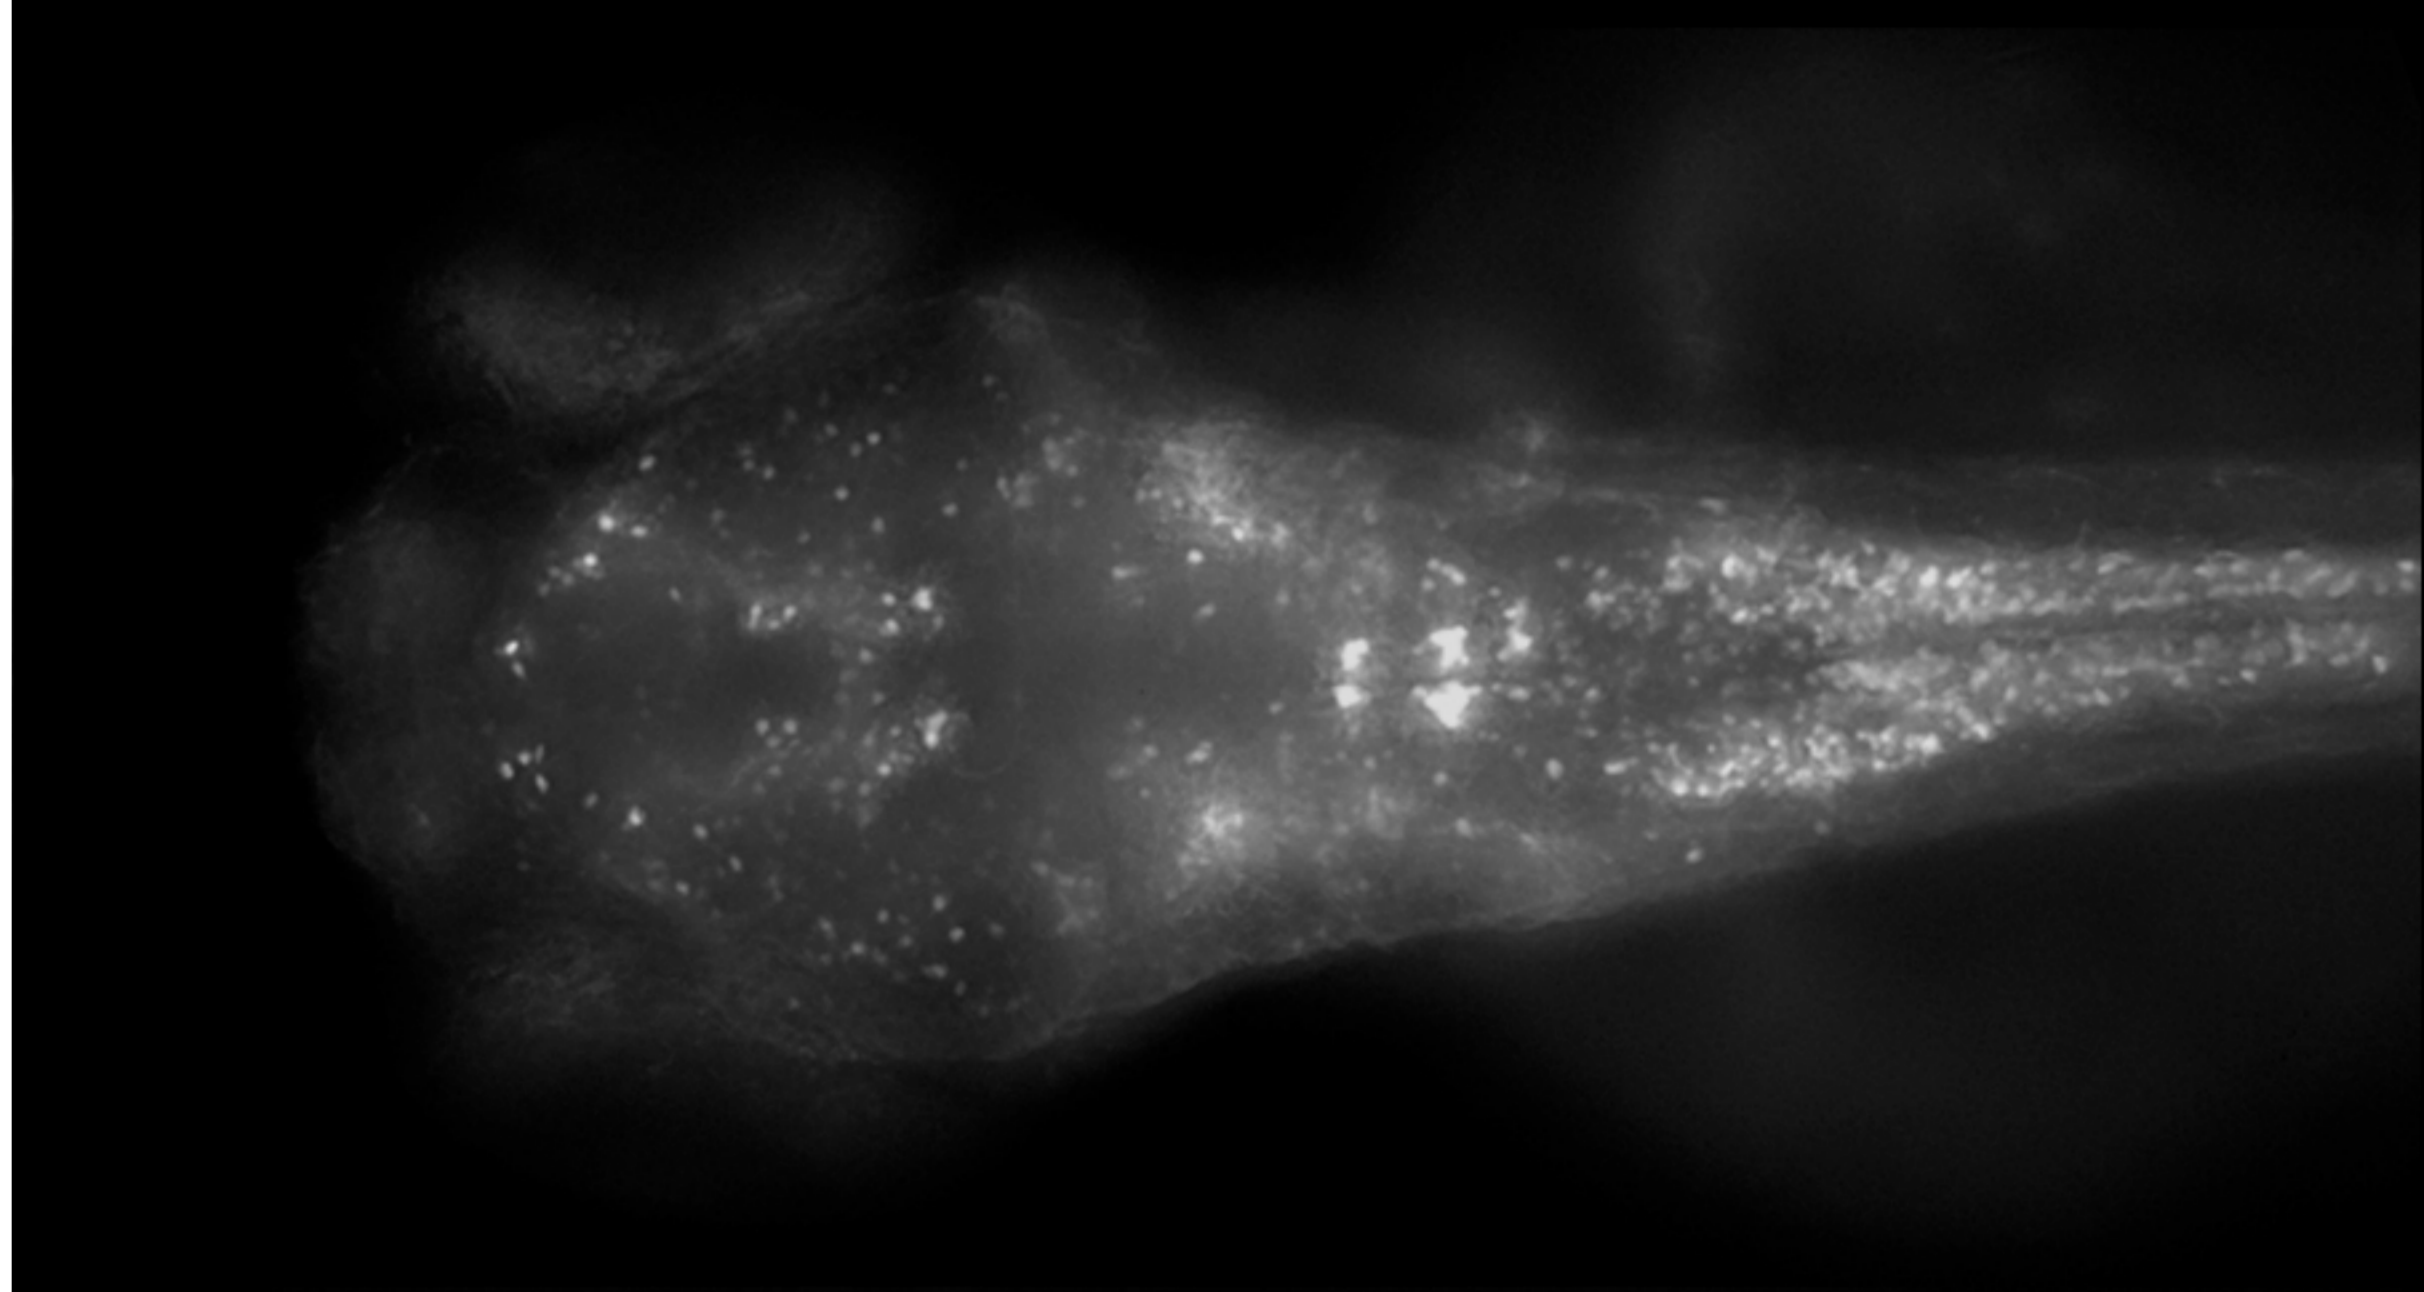

*Lmx1a\_296.86*

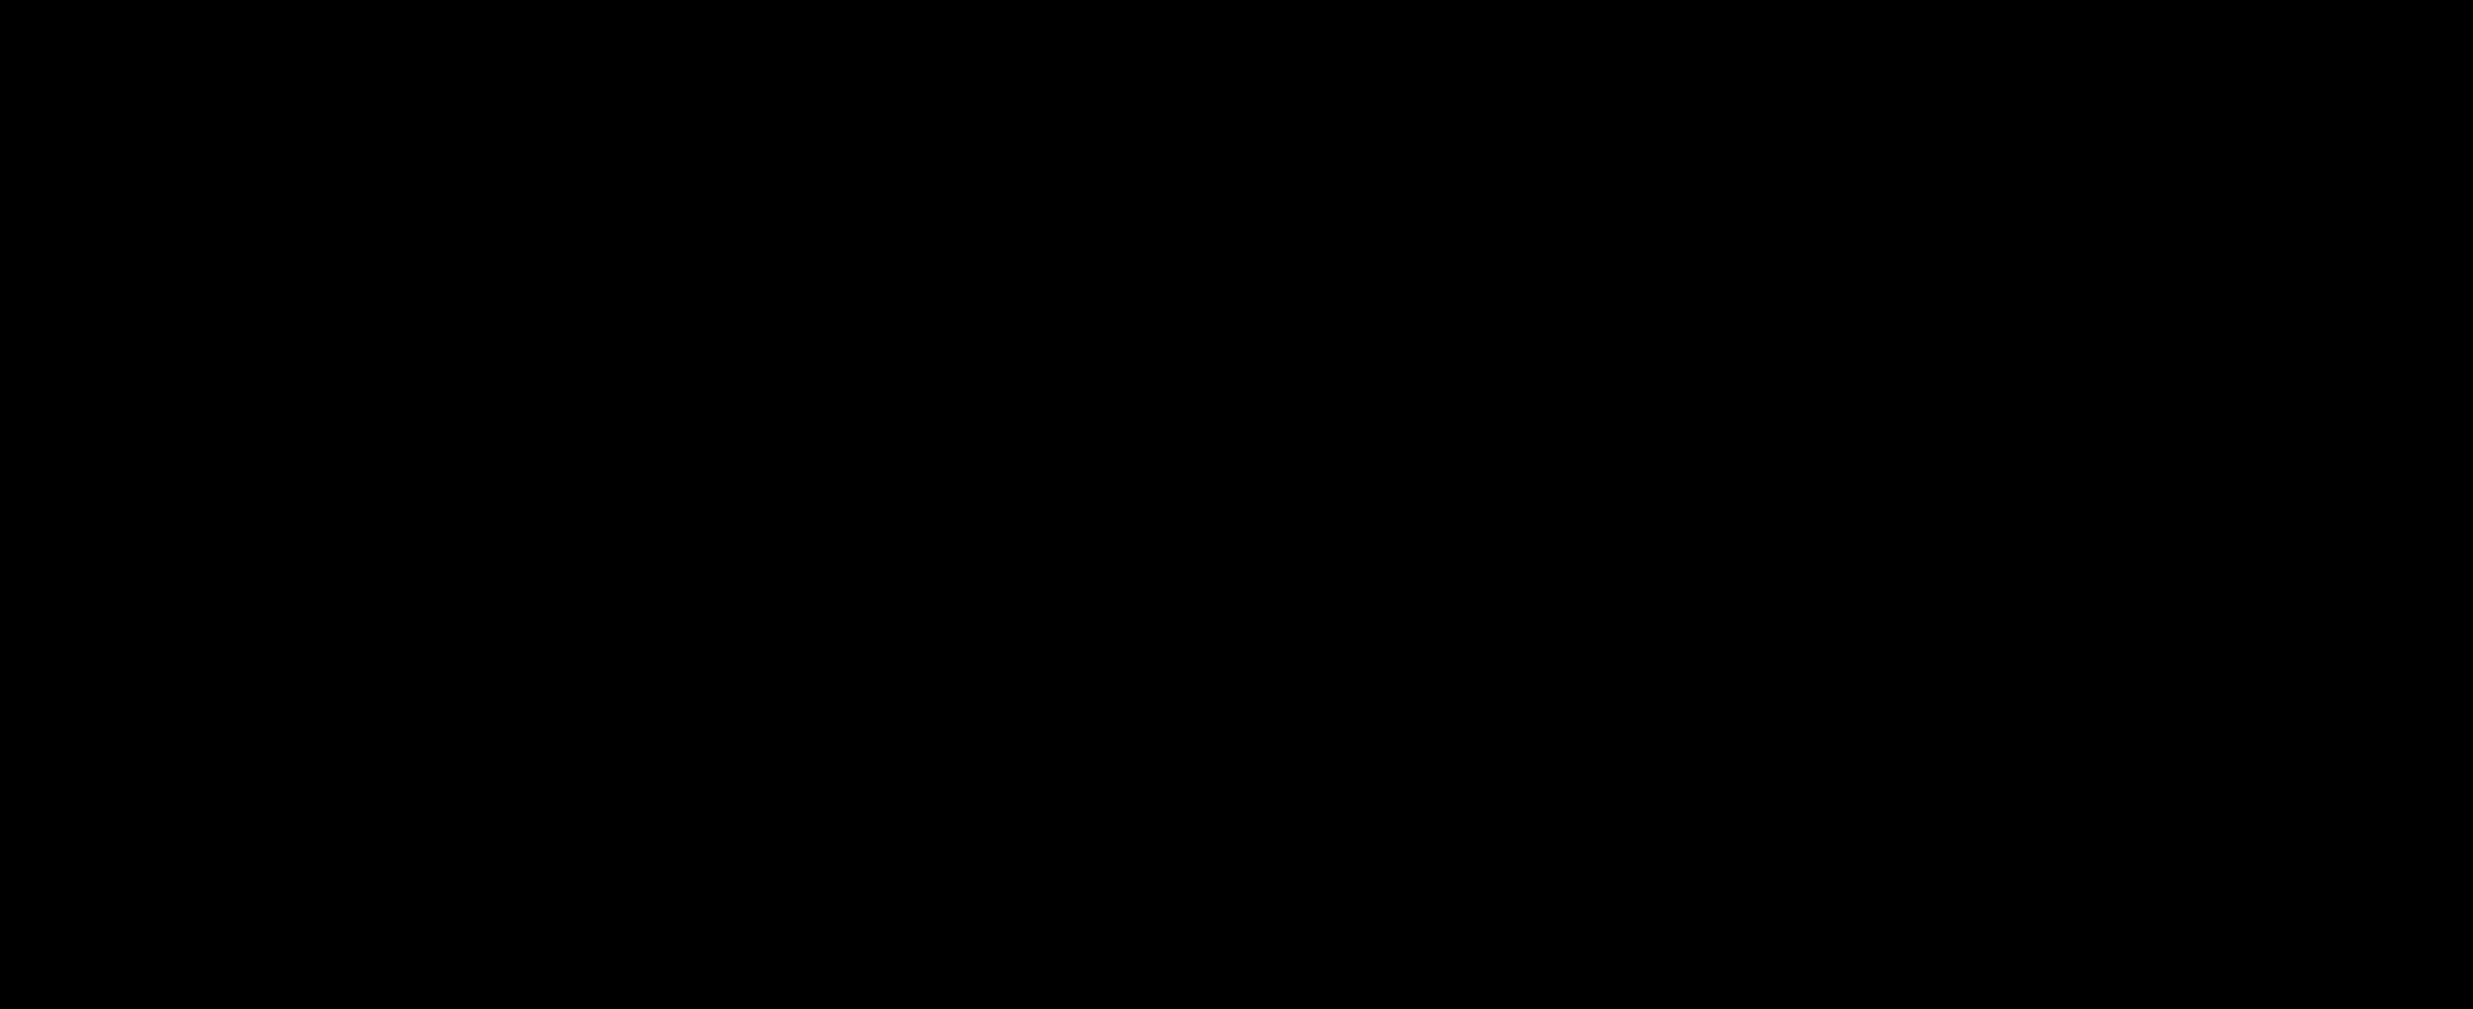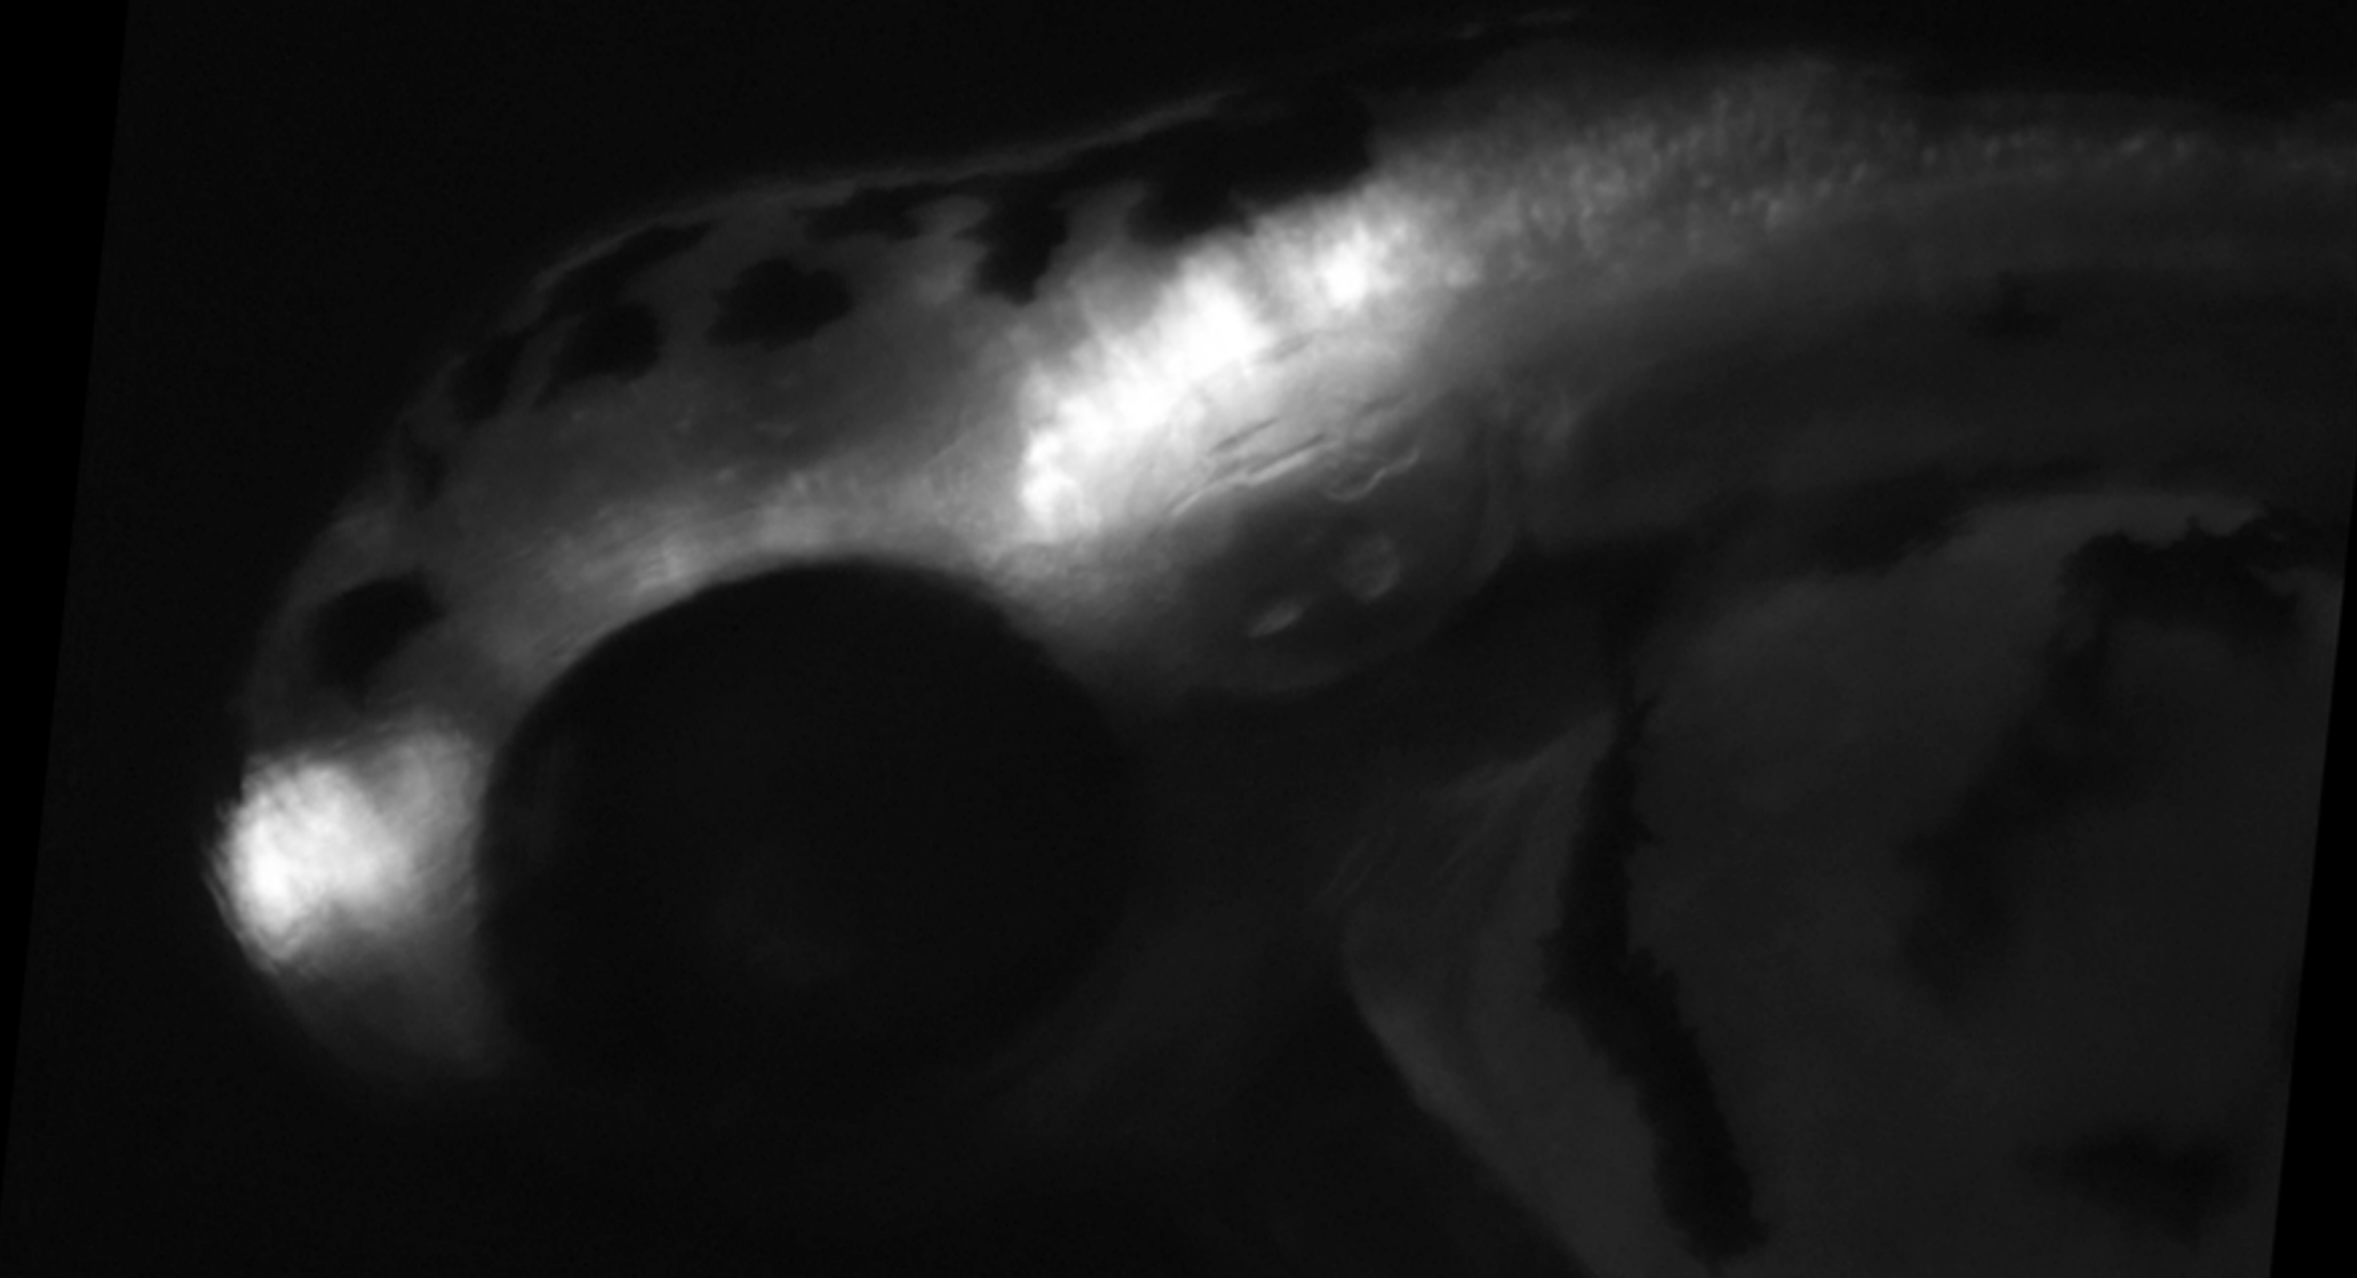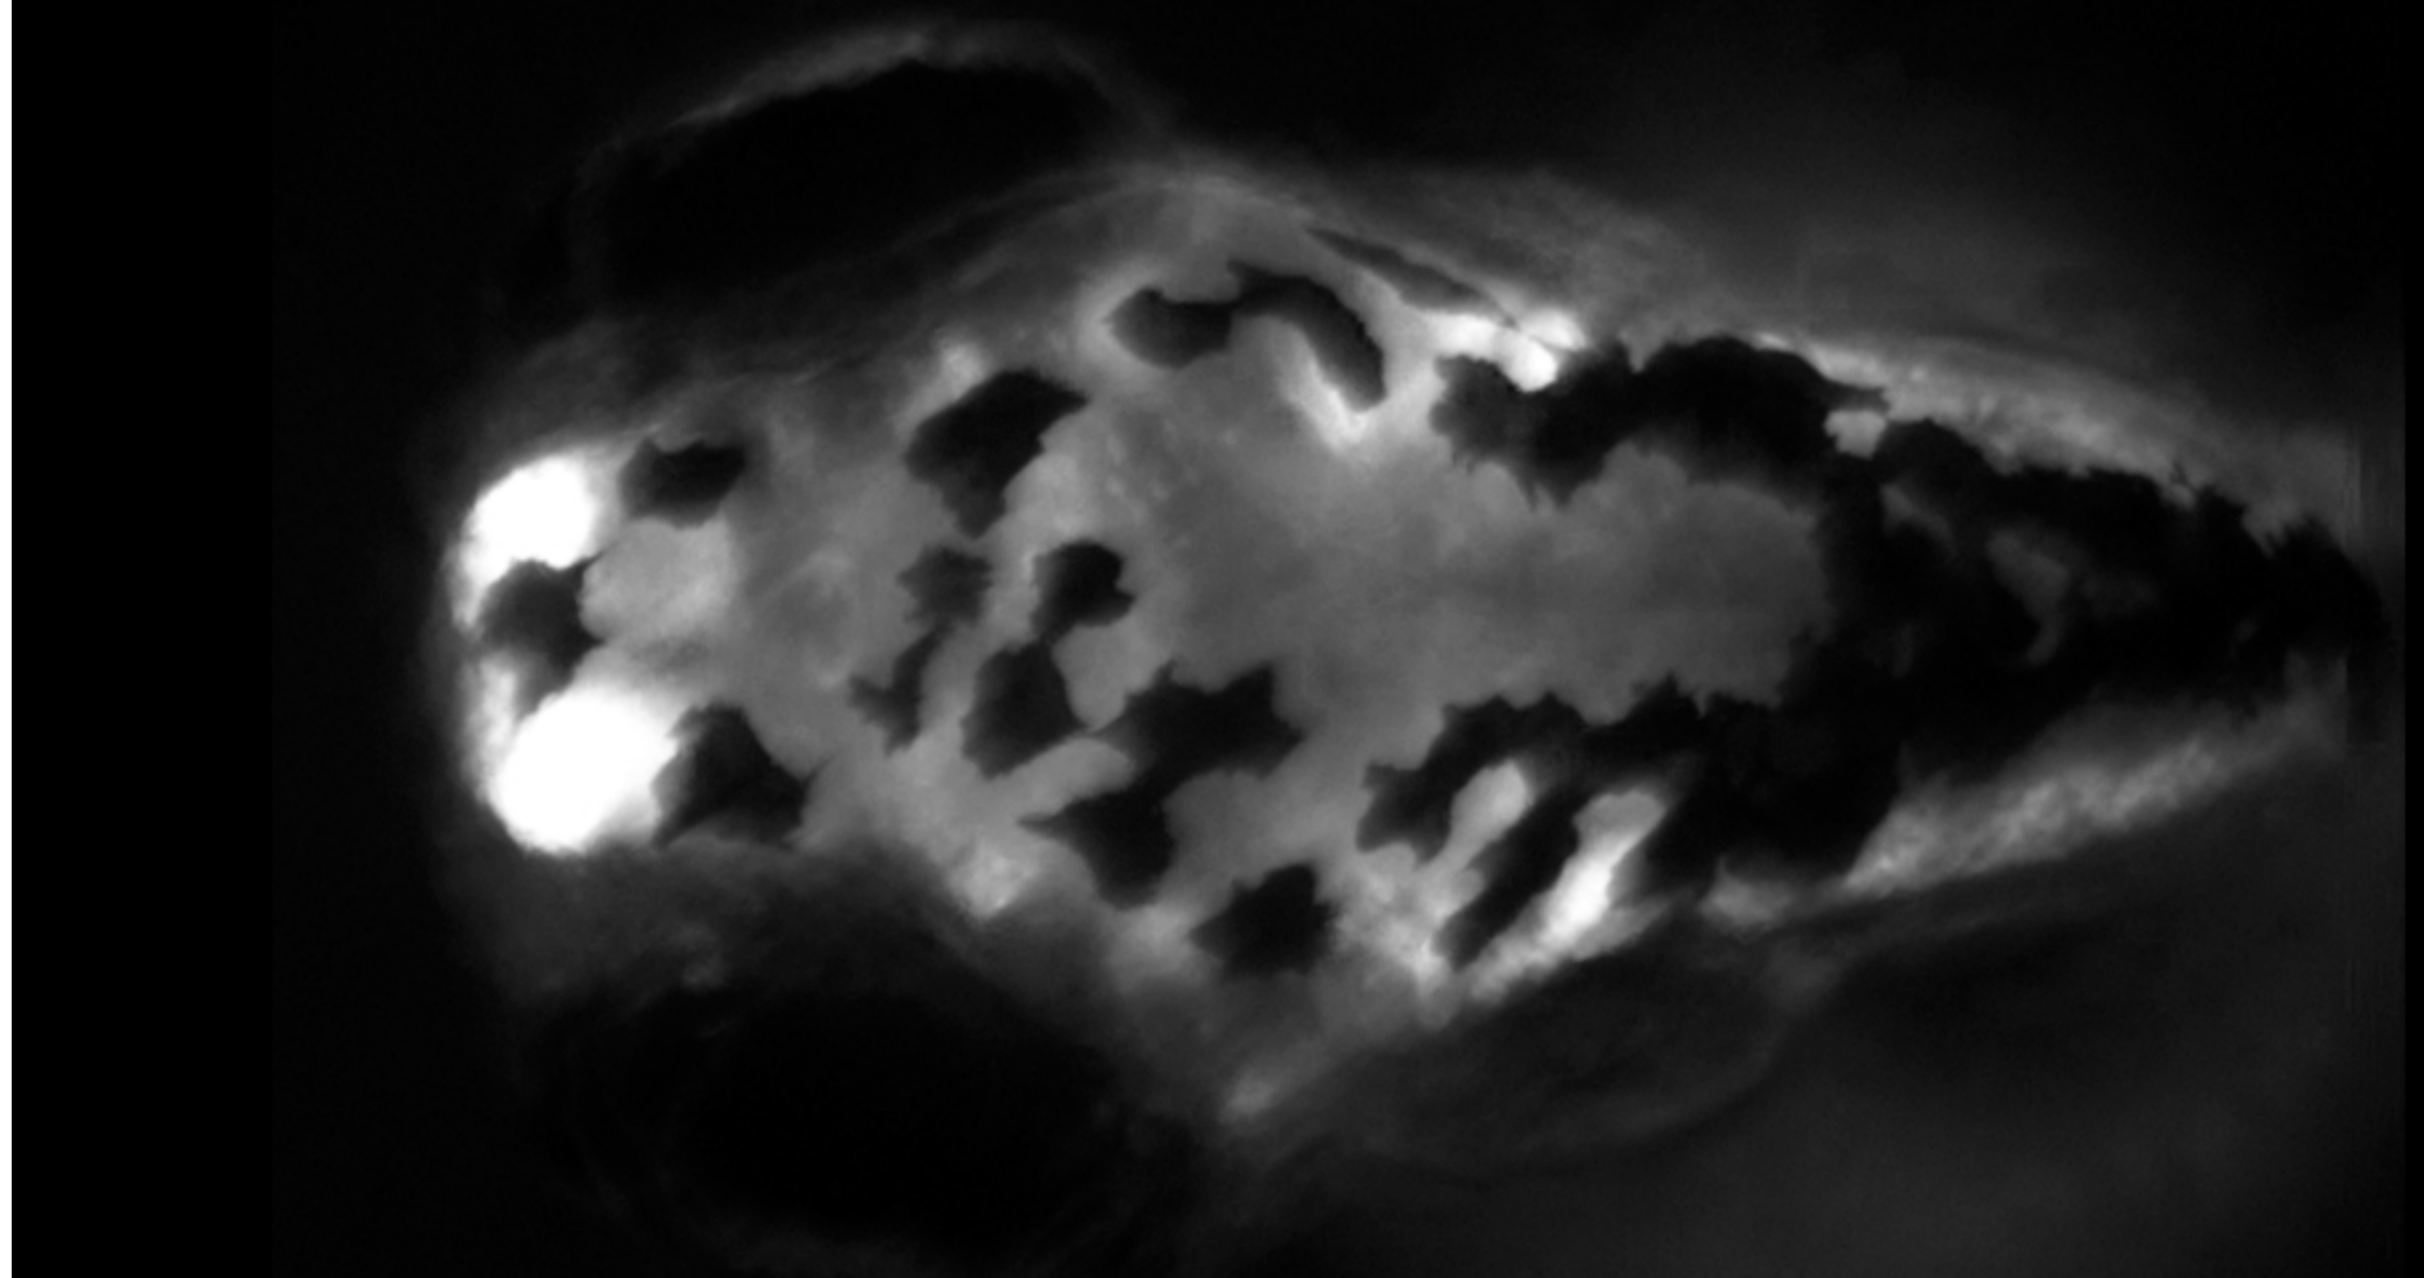

*Lmx1a\_475.57*

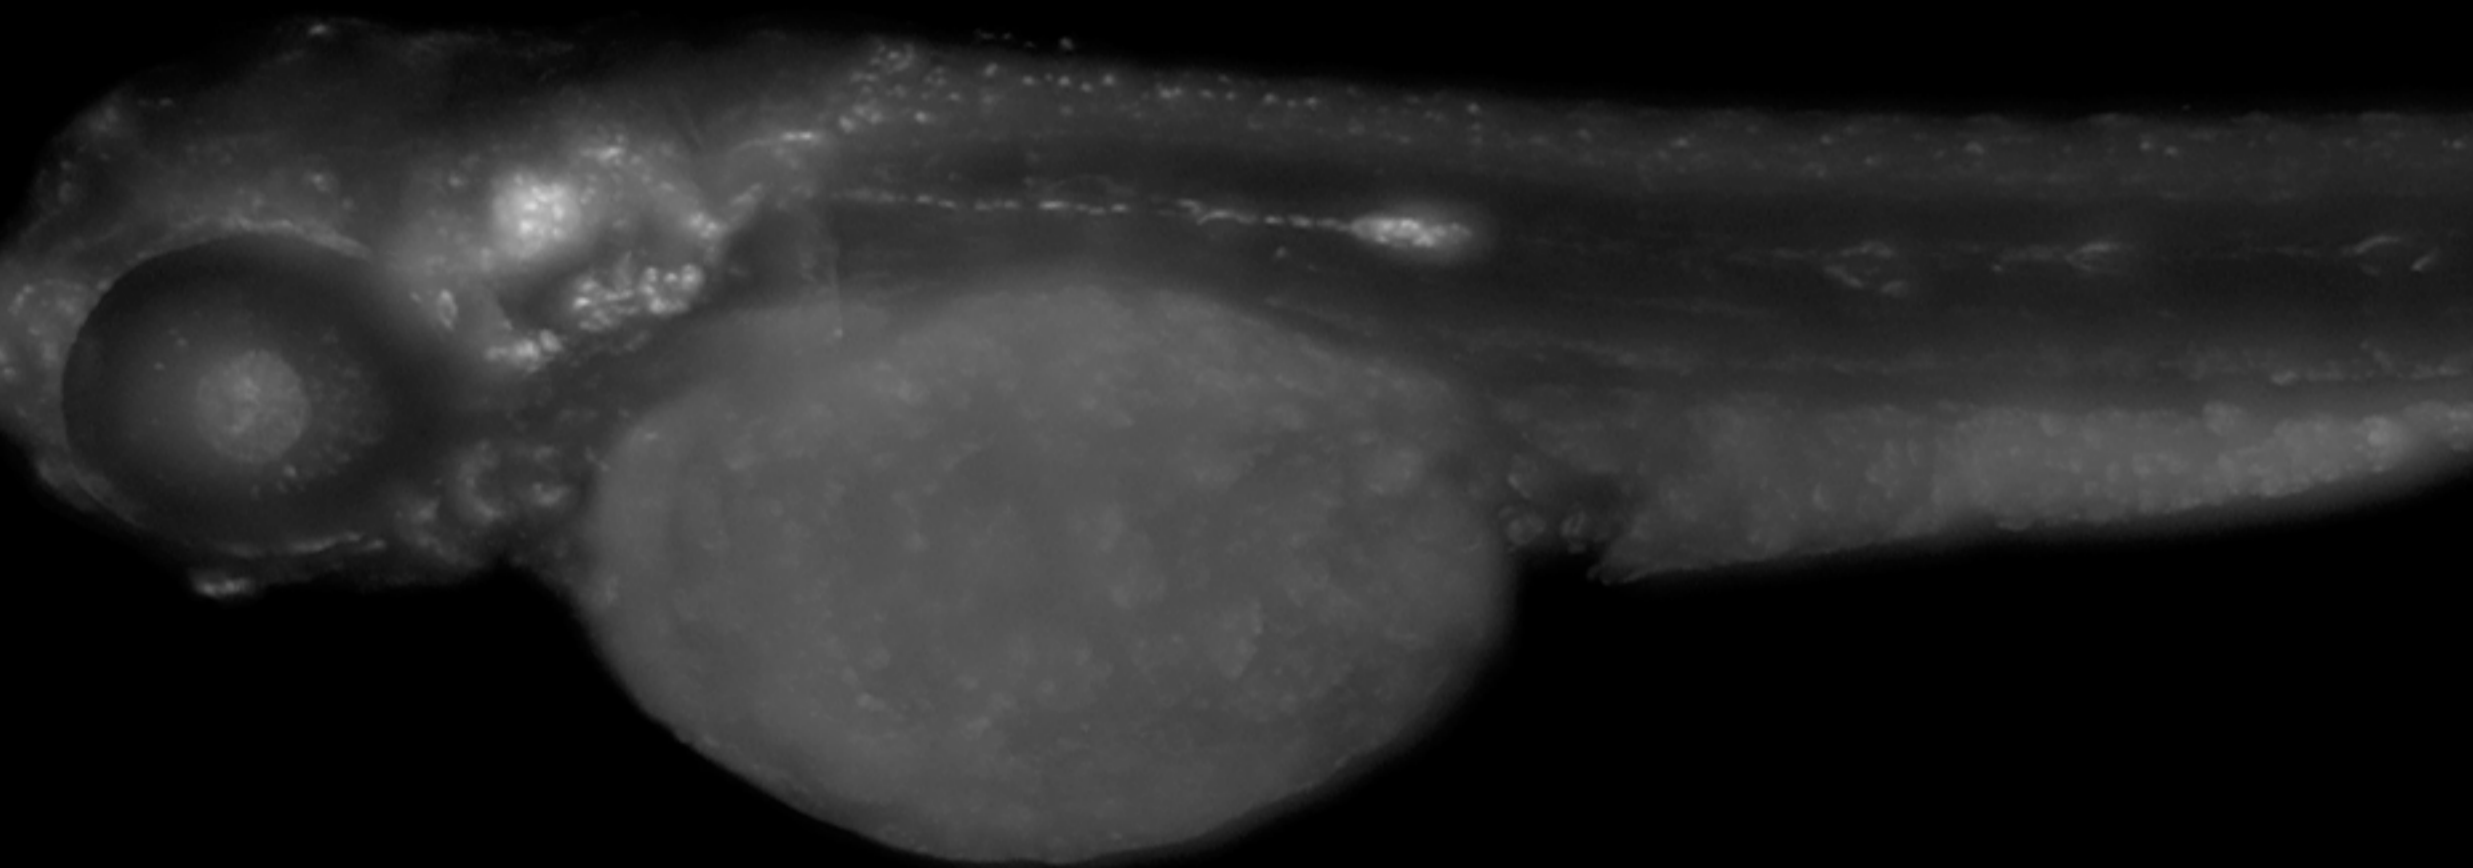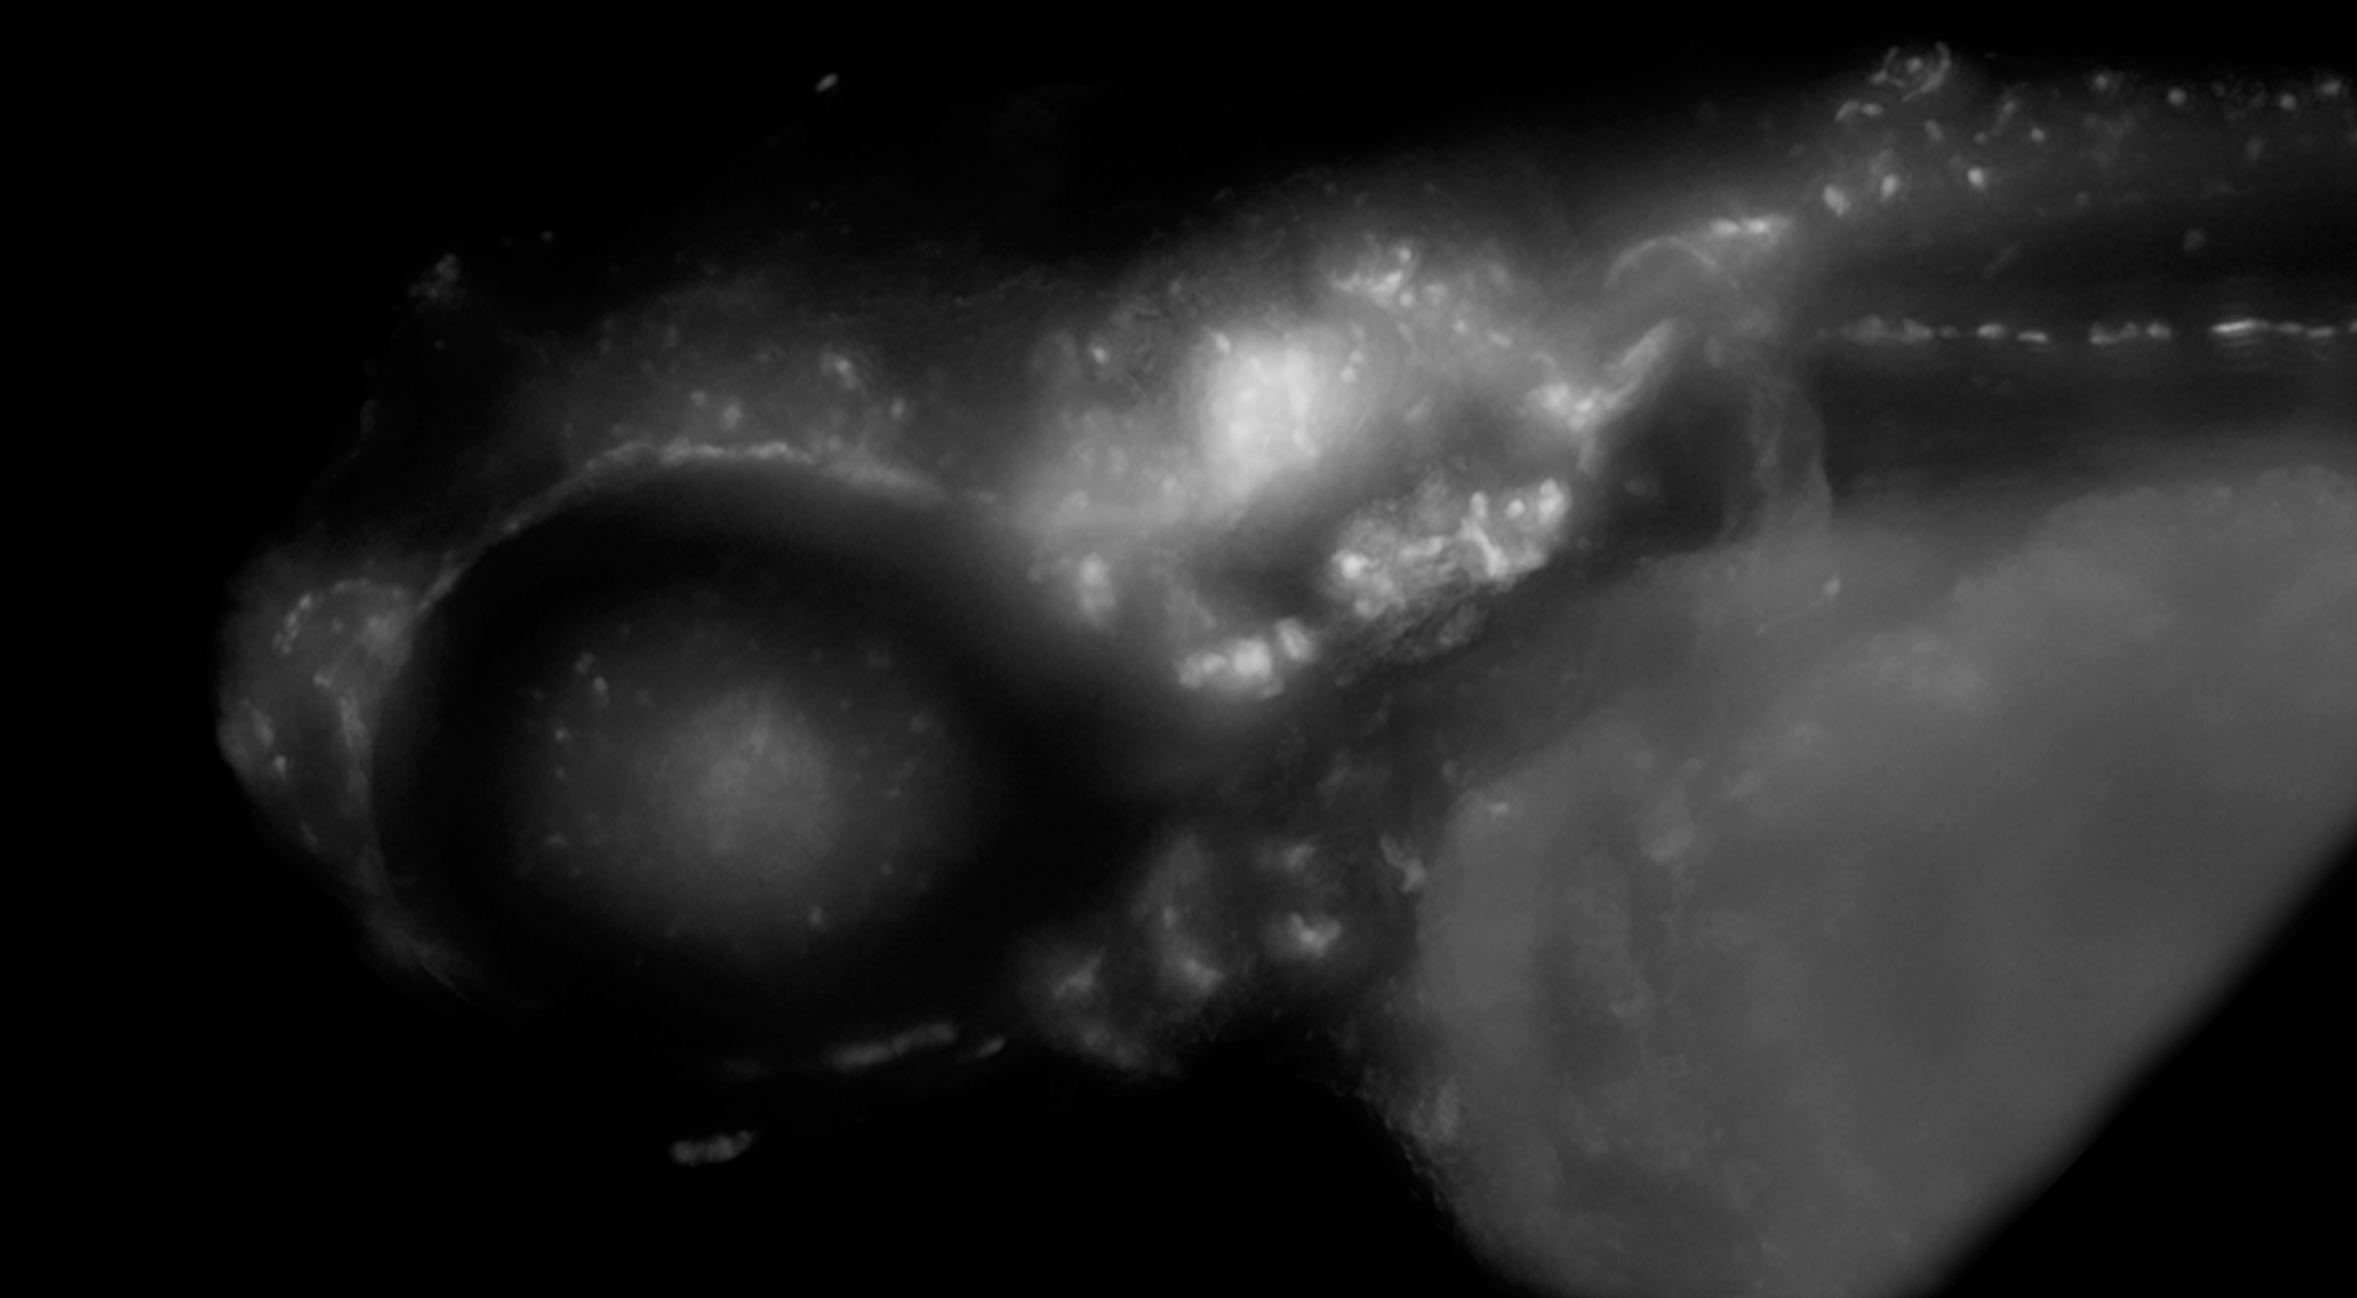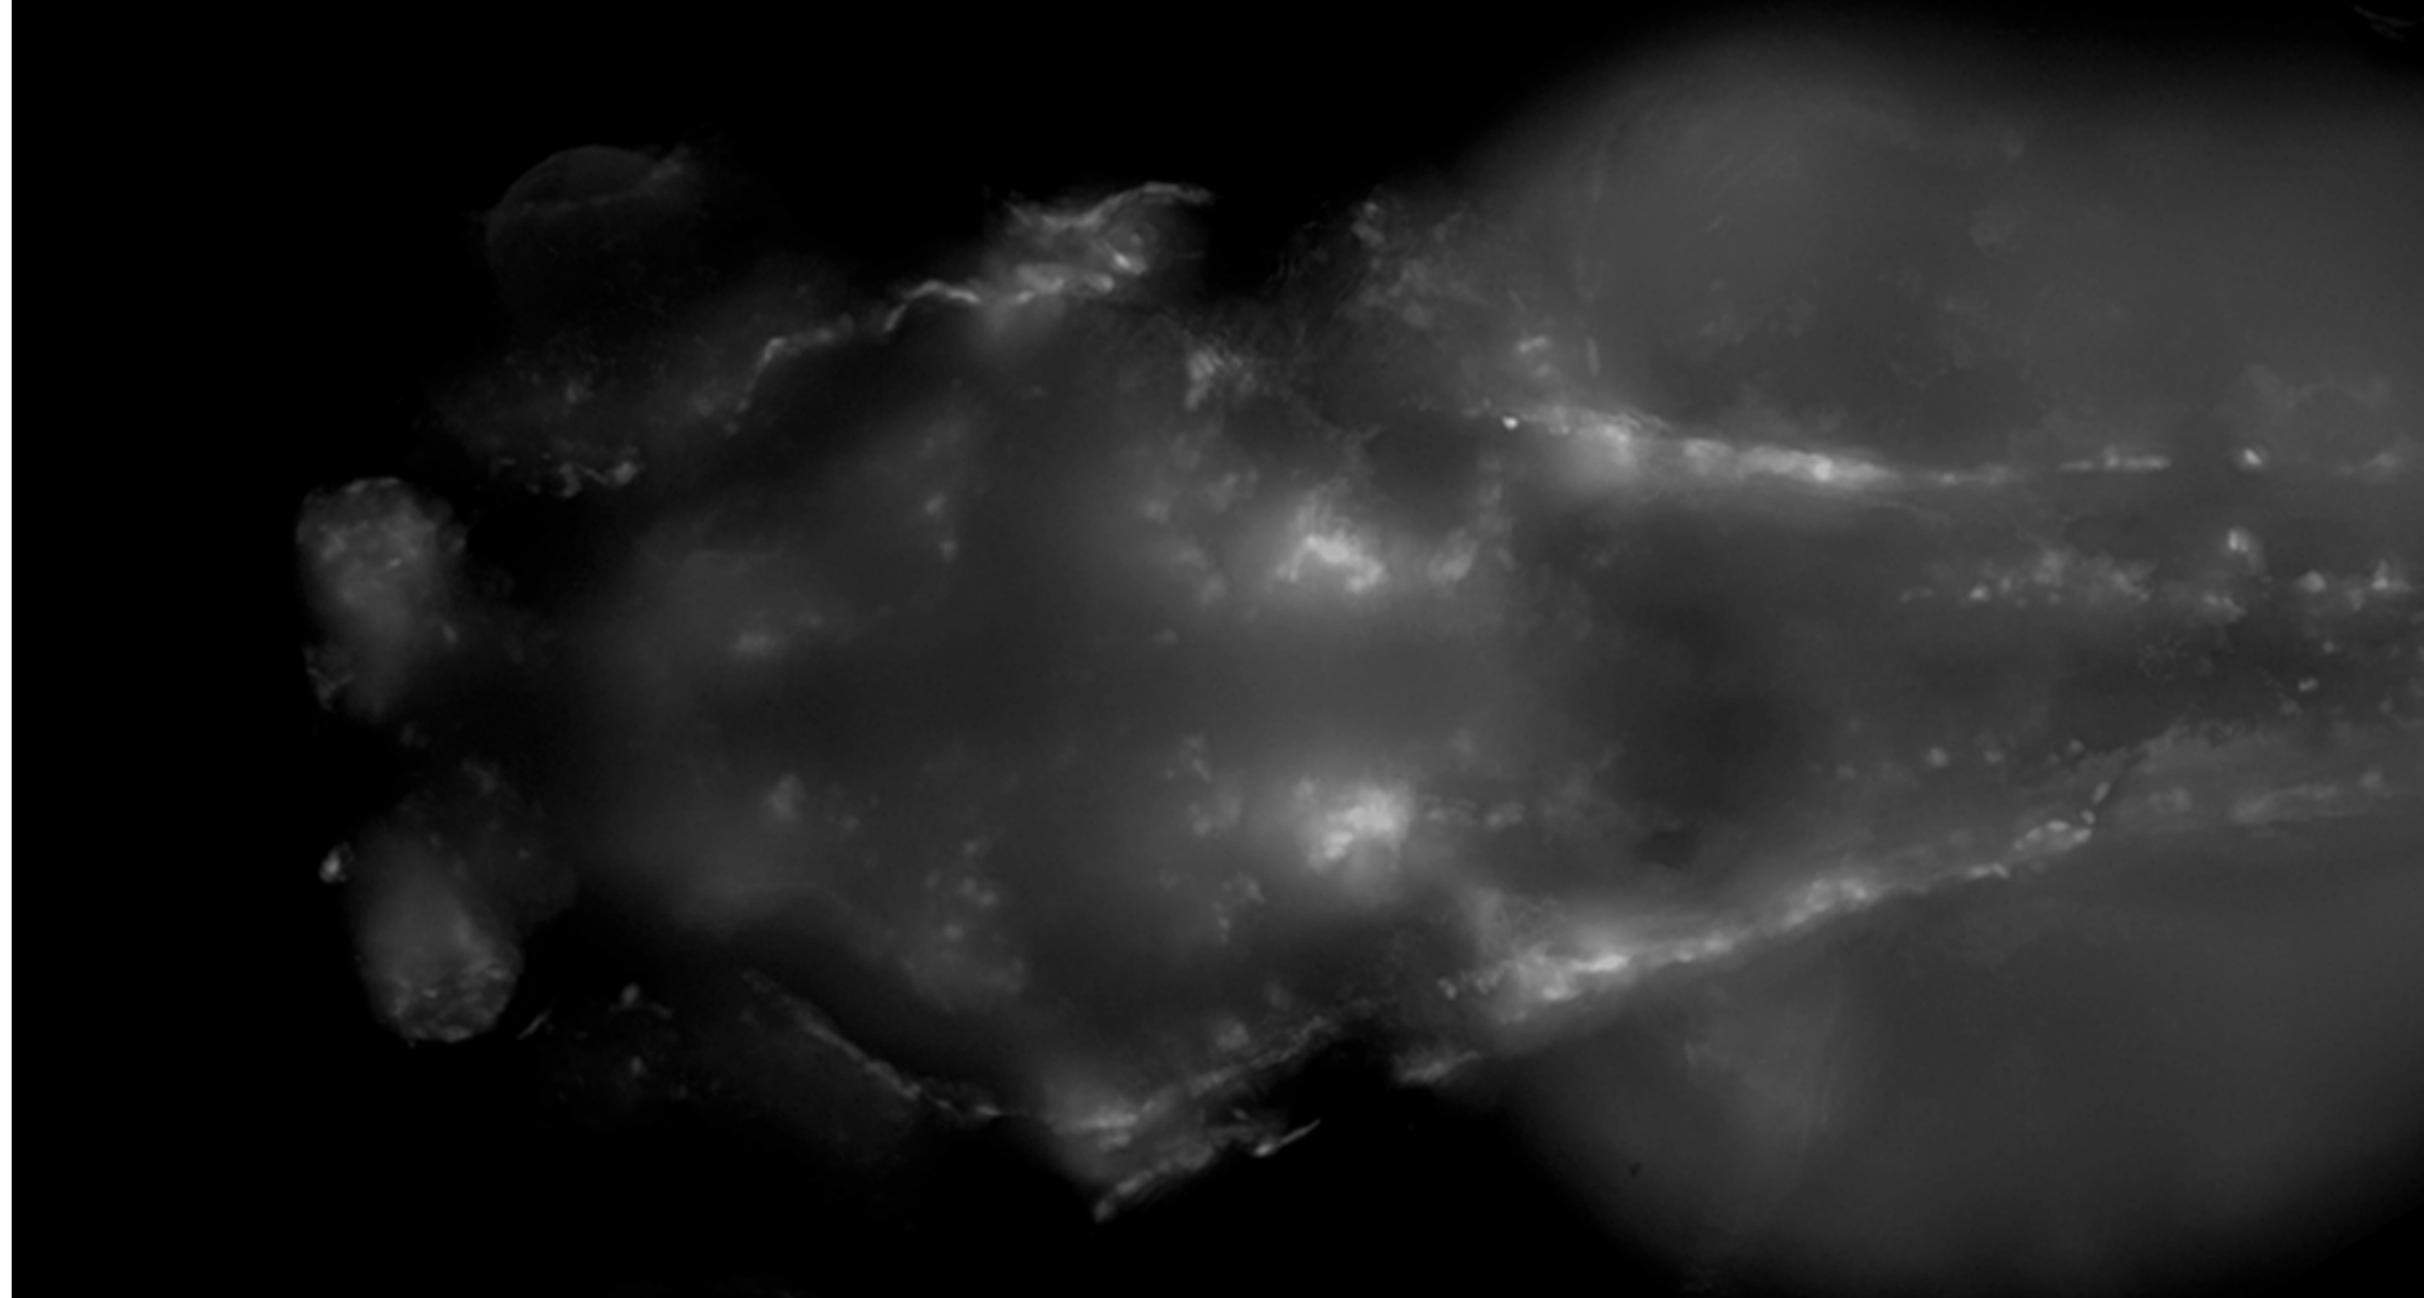

*Lmx1a\_479.86*

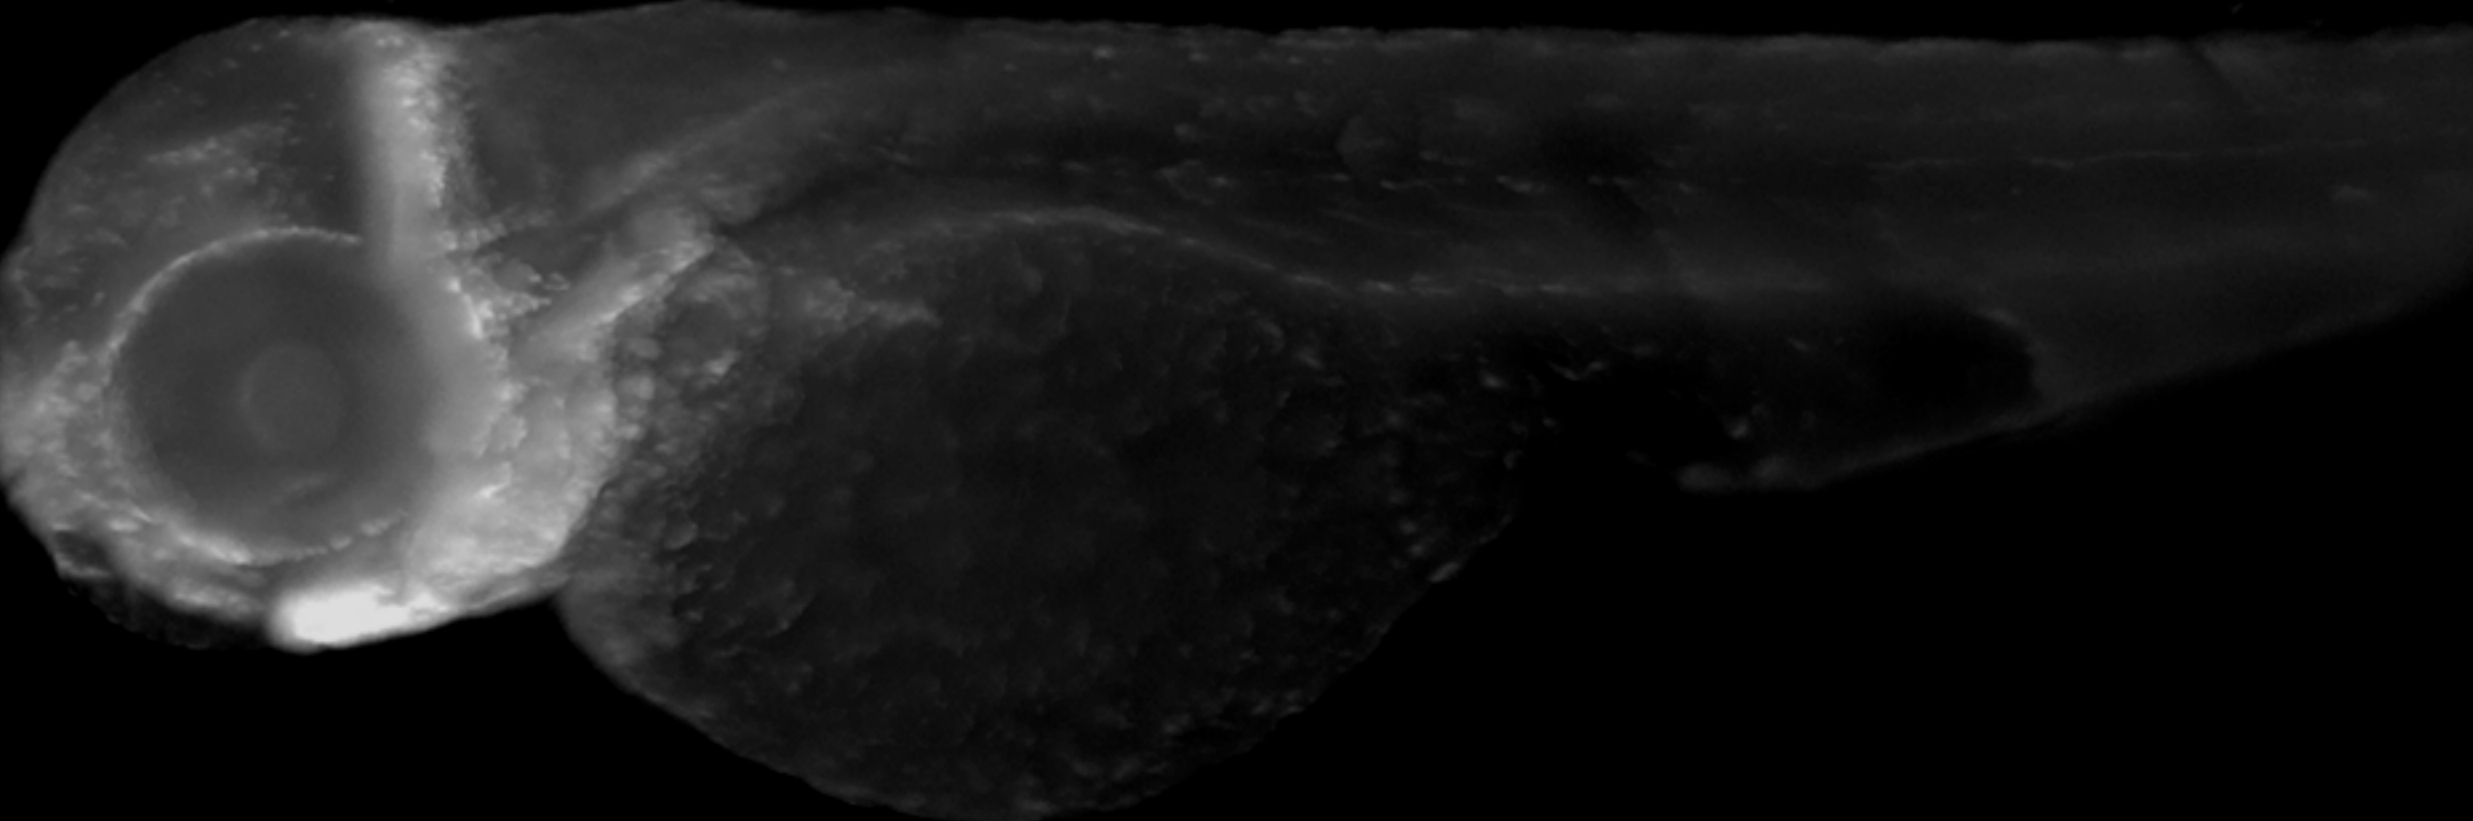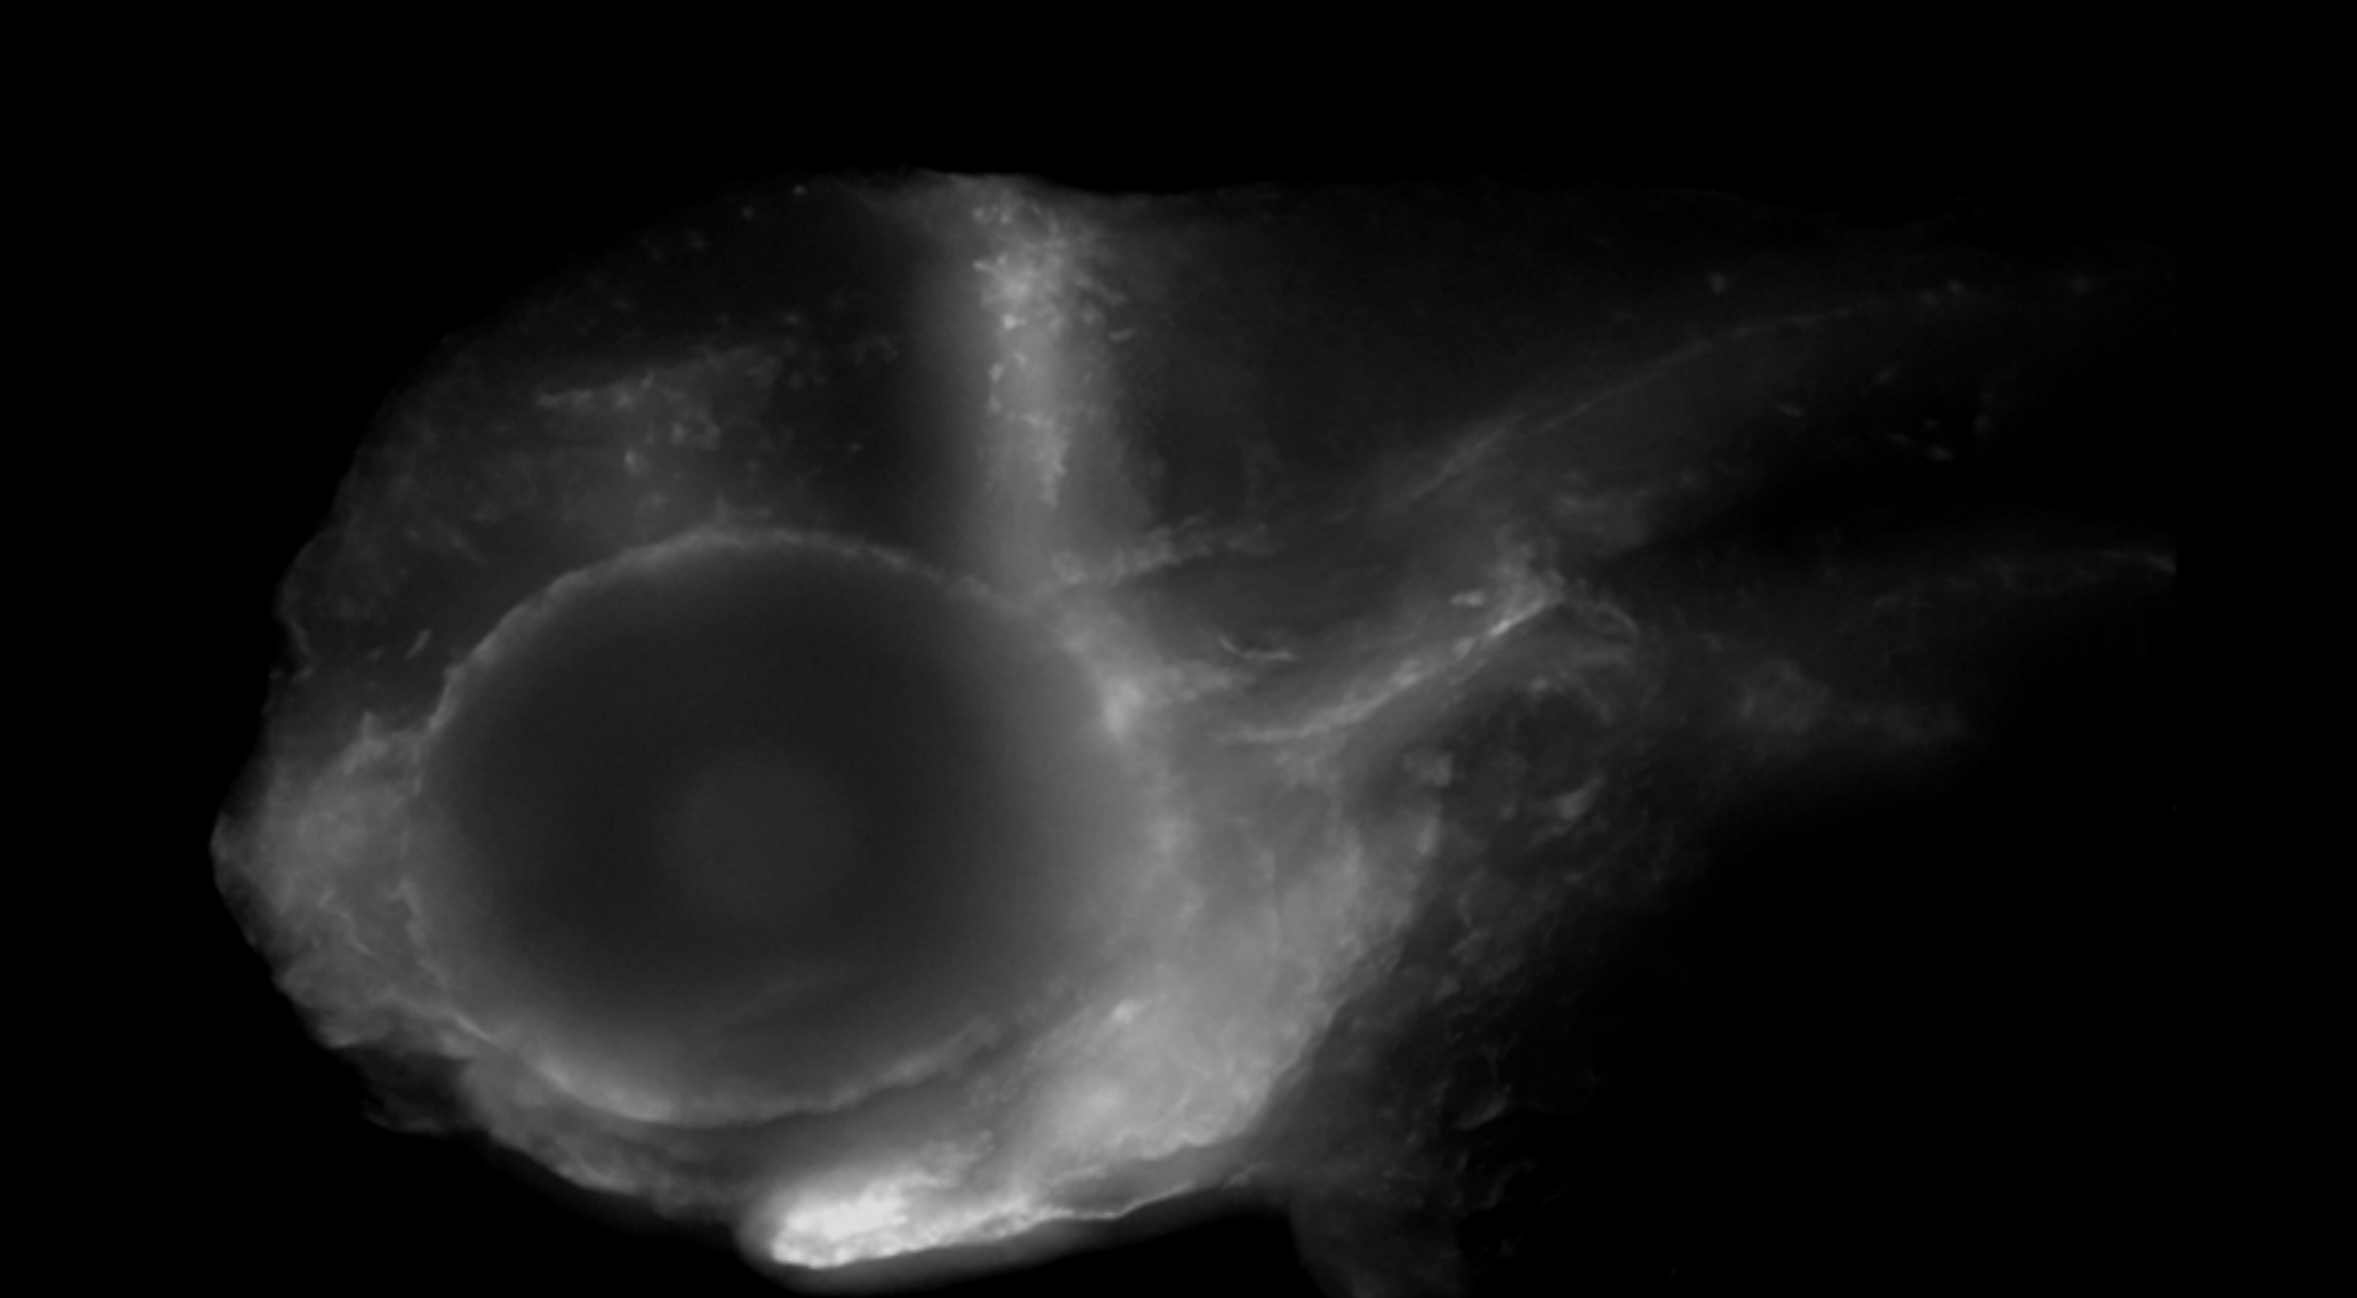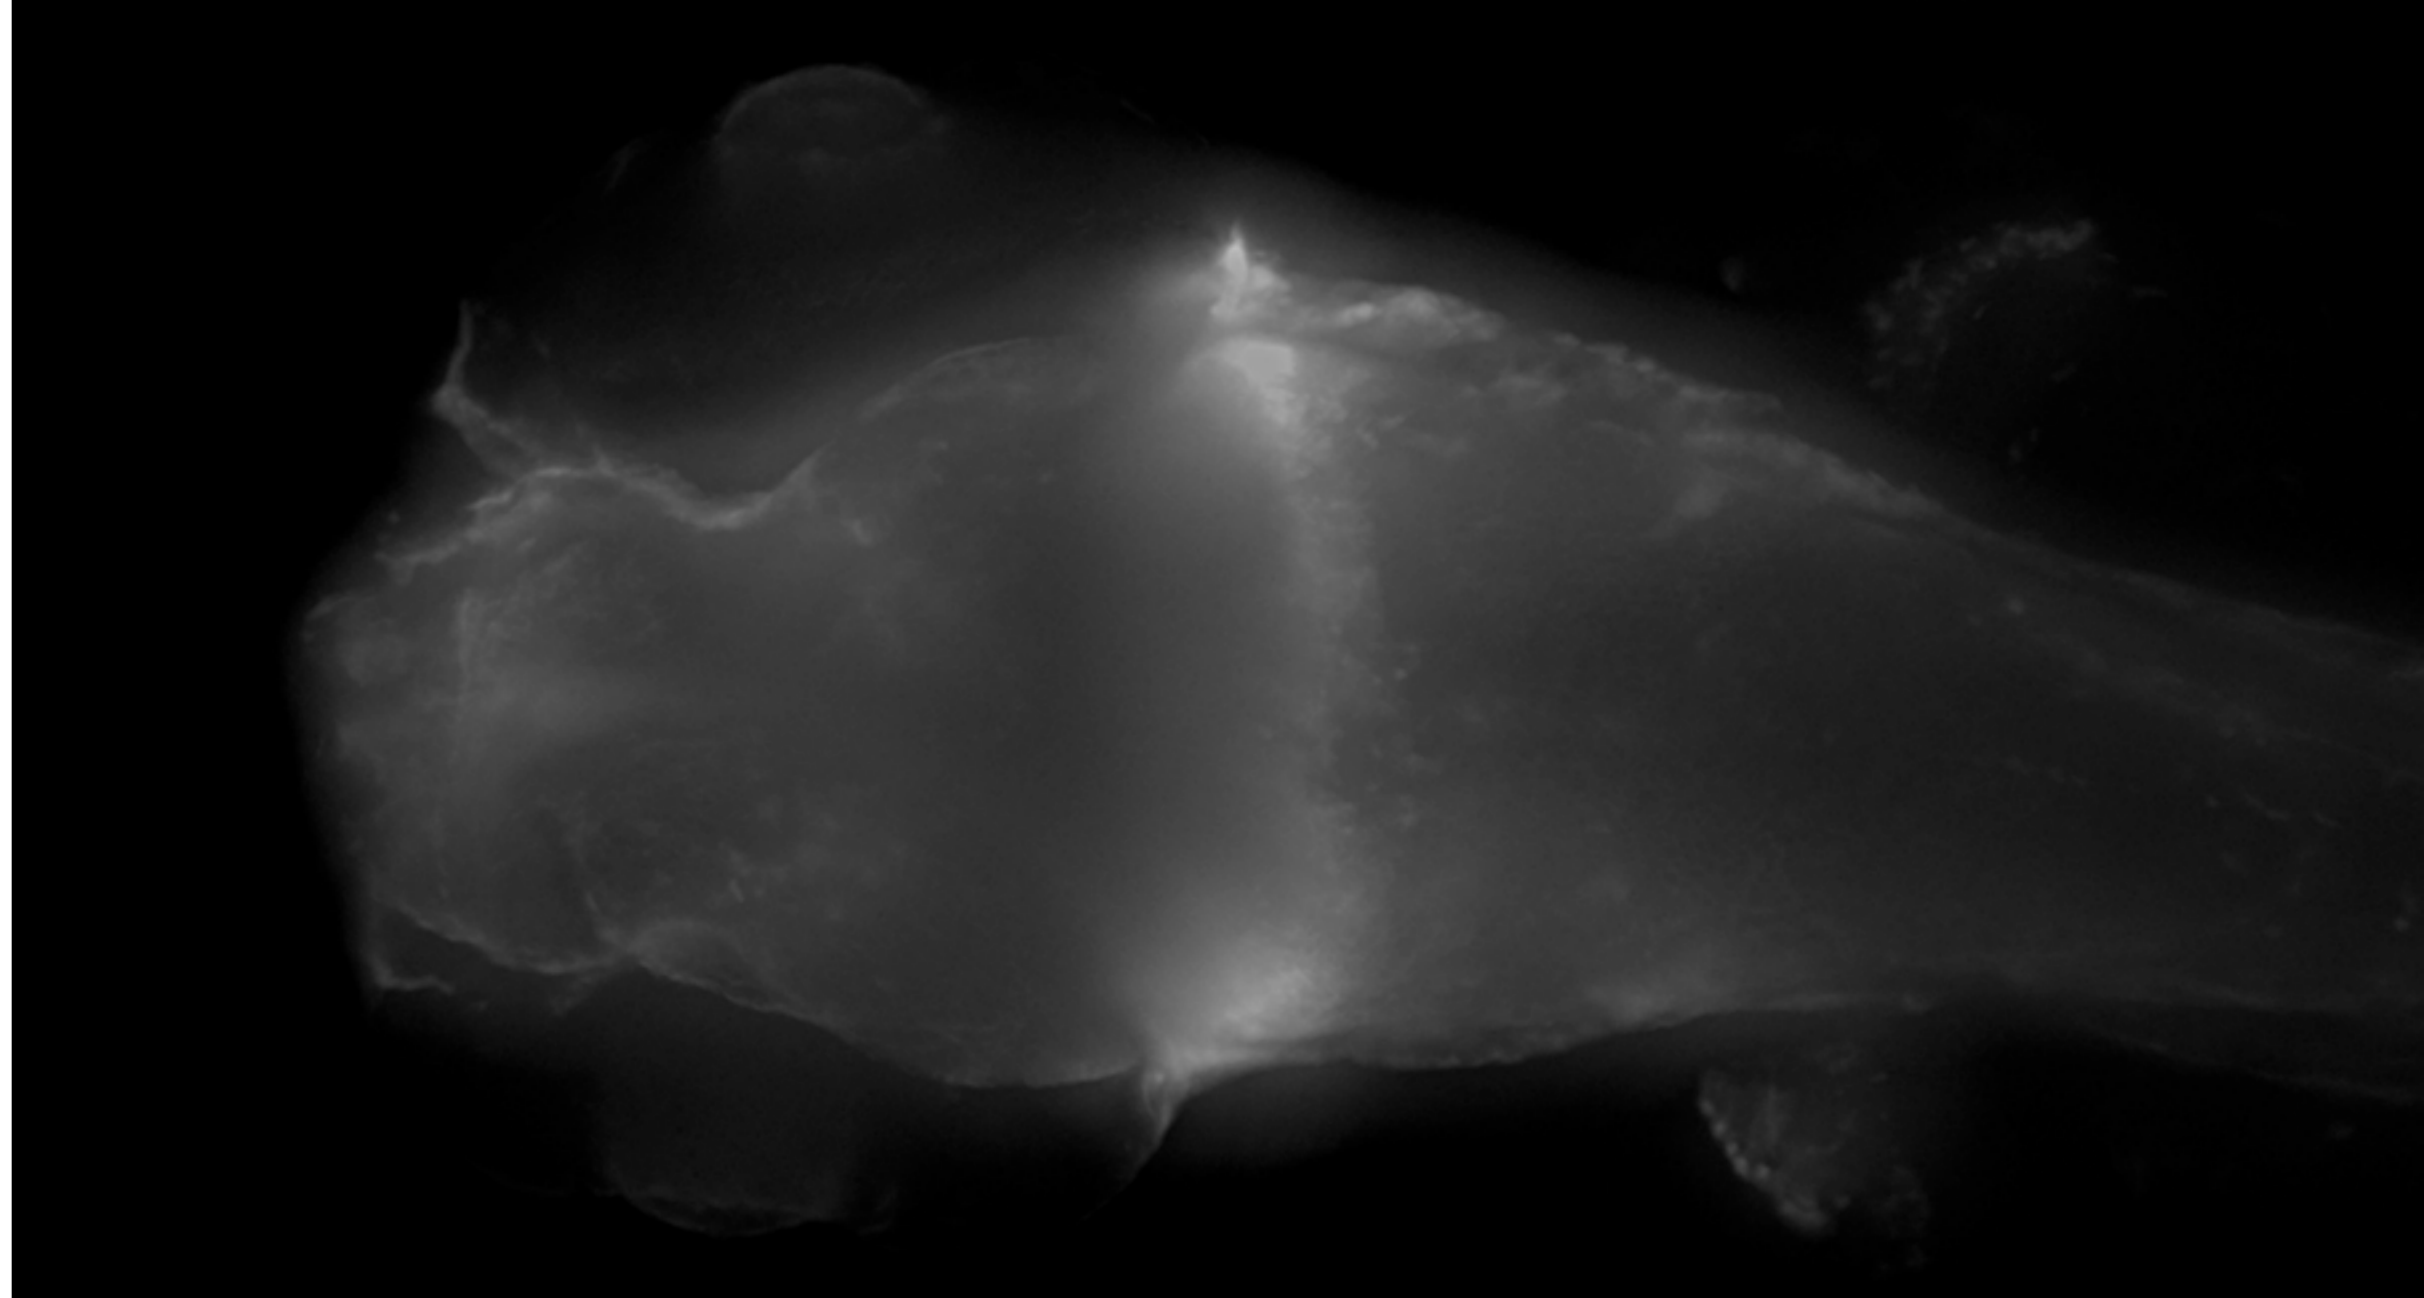

Supplement: NIHMS515584-supplement-438_2013_771_MOESM3_ESM.pdf [file NIHMS515584-supplement-438_2013_771_MOESM3_ESM.pdf]

*Lmx1b*\_-93.21

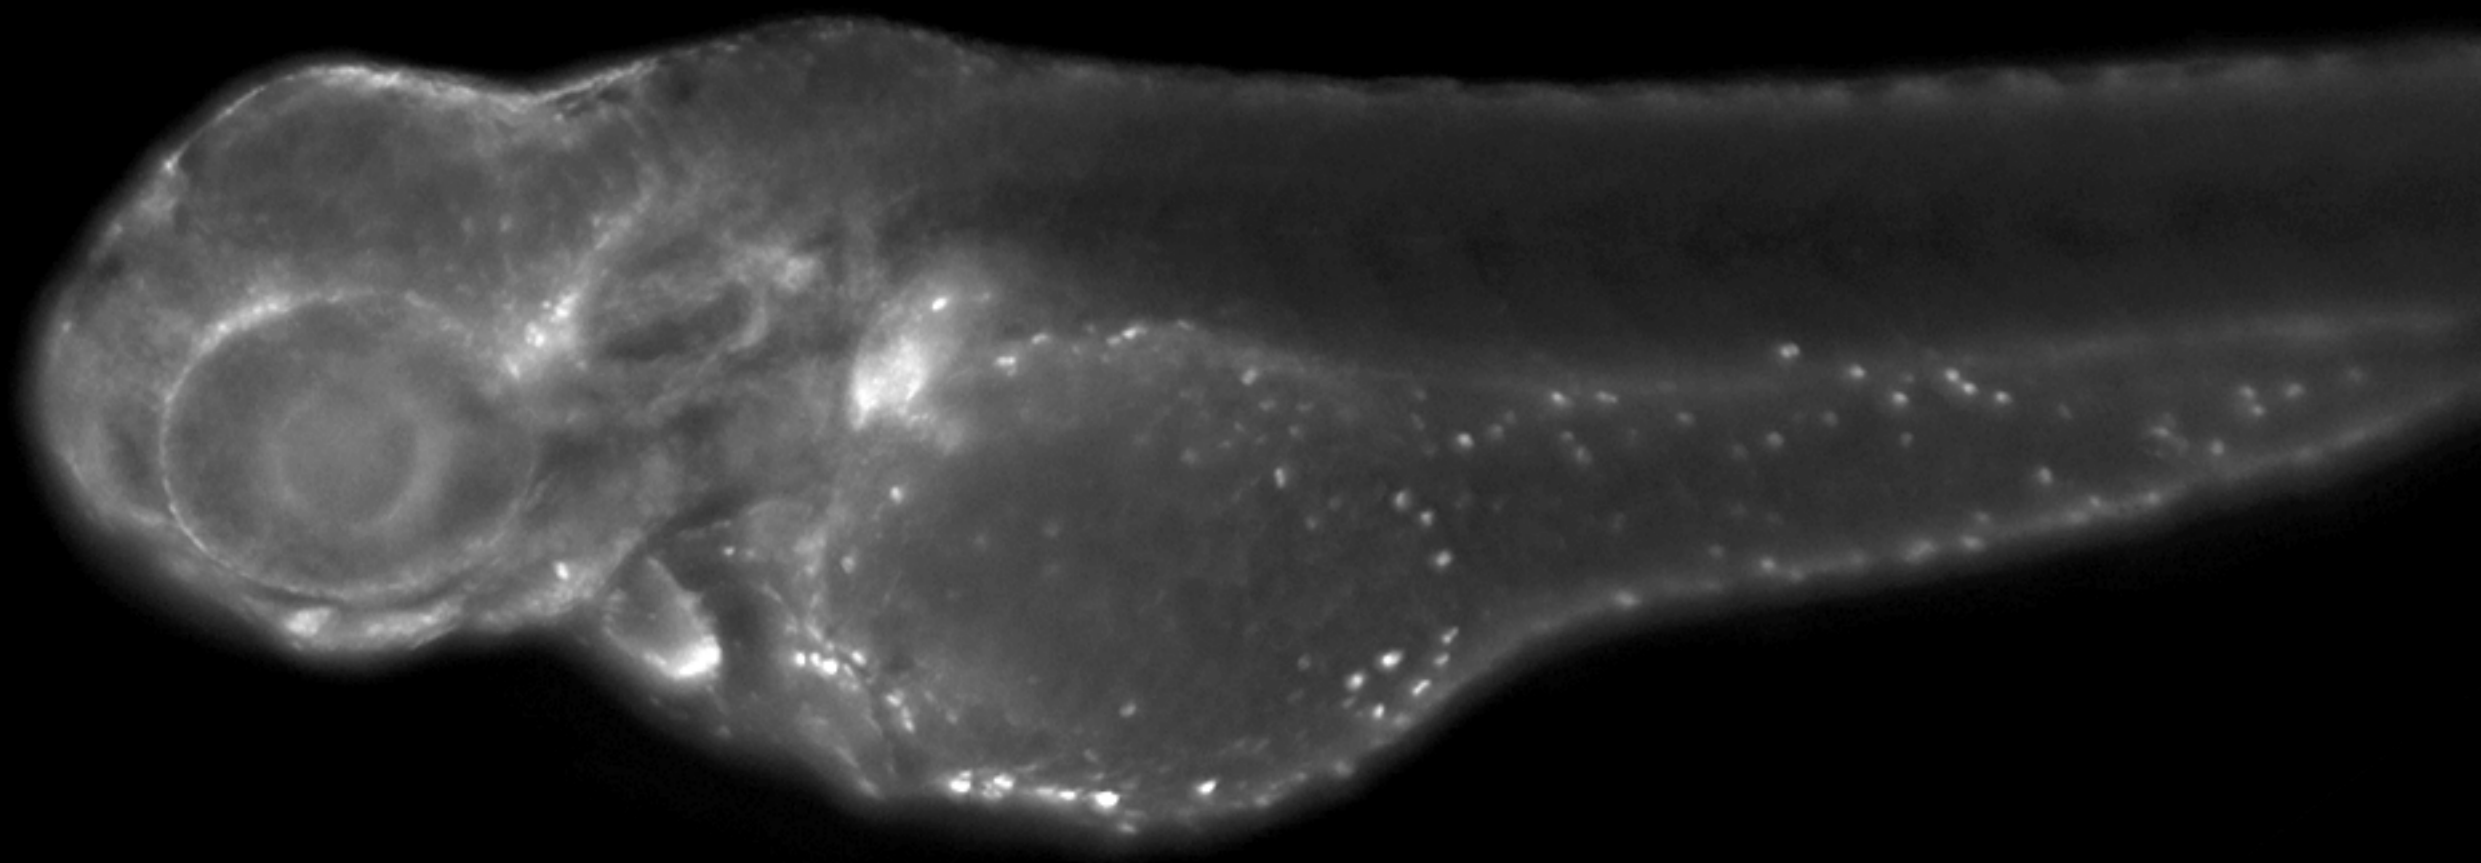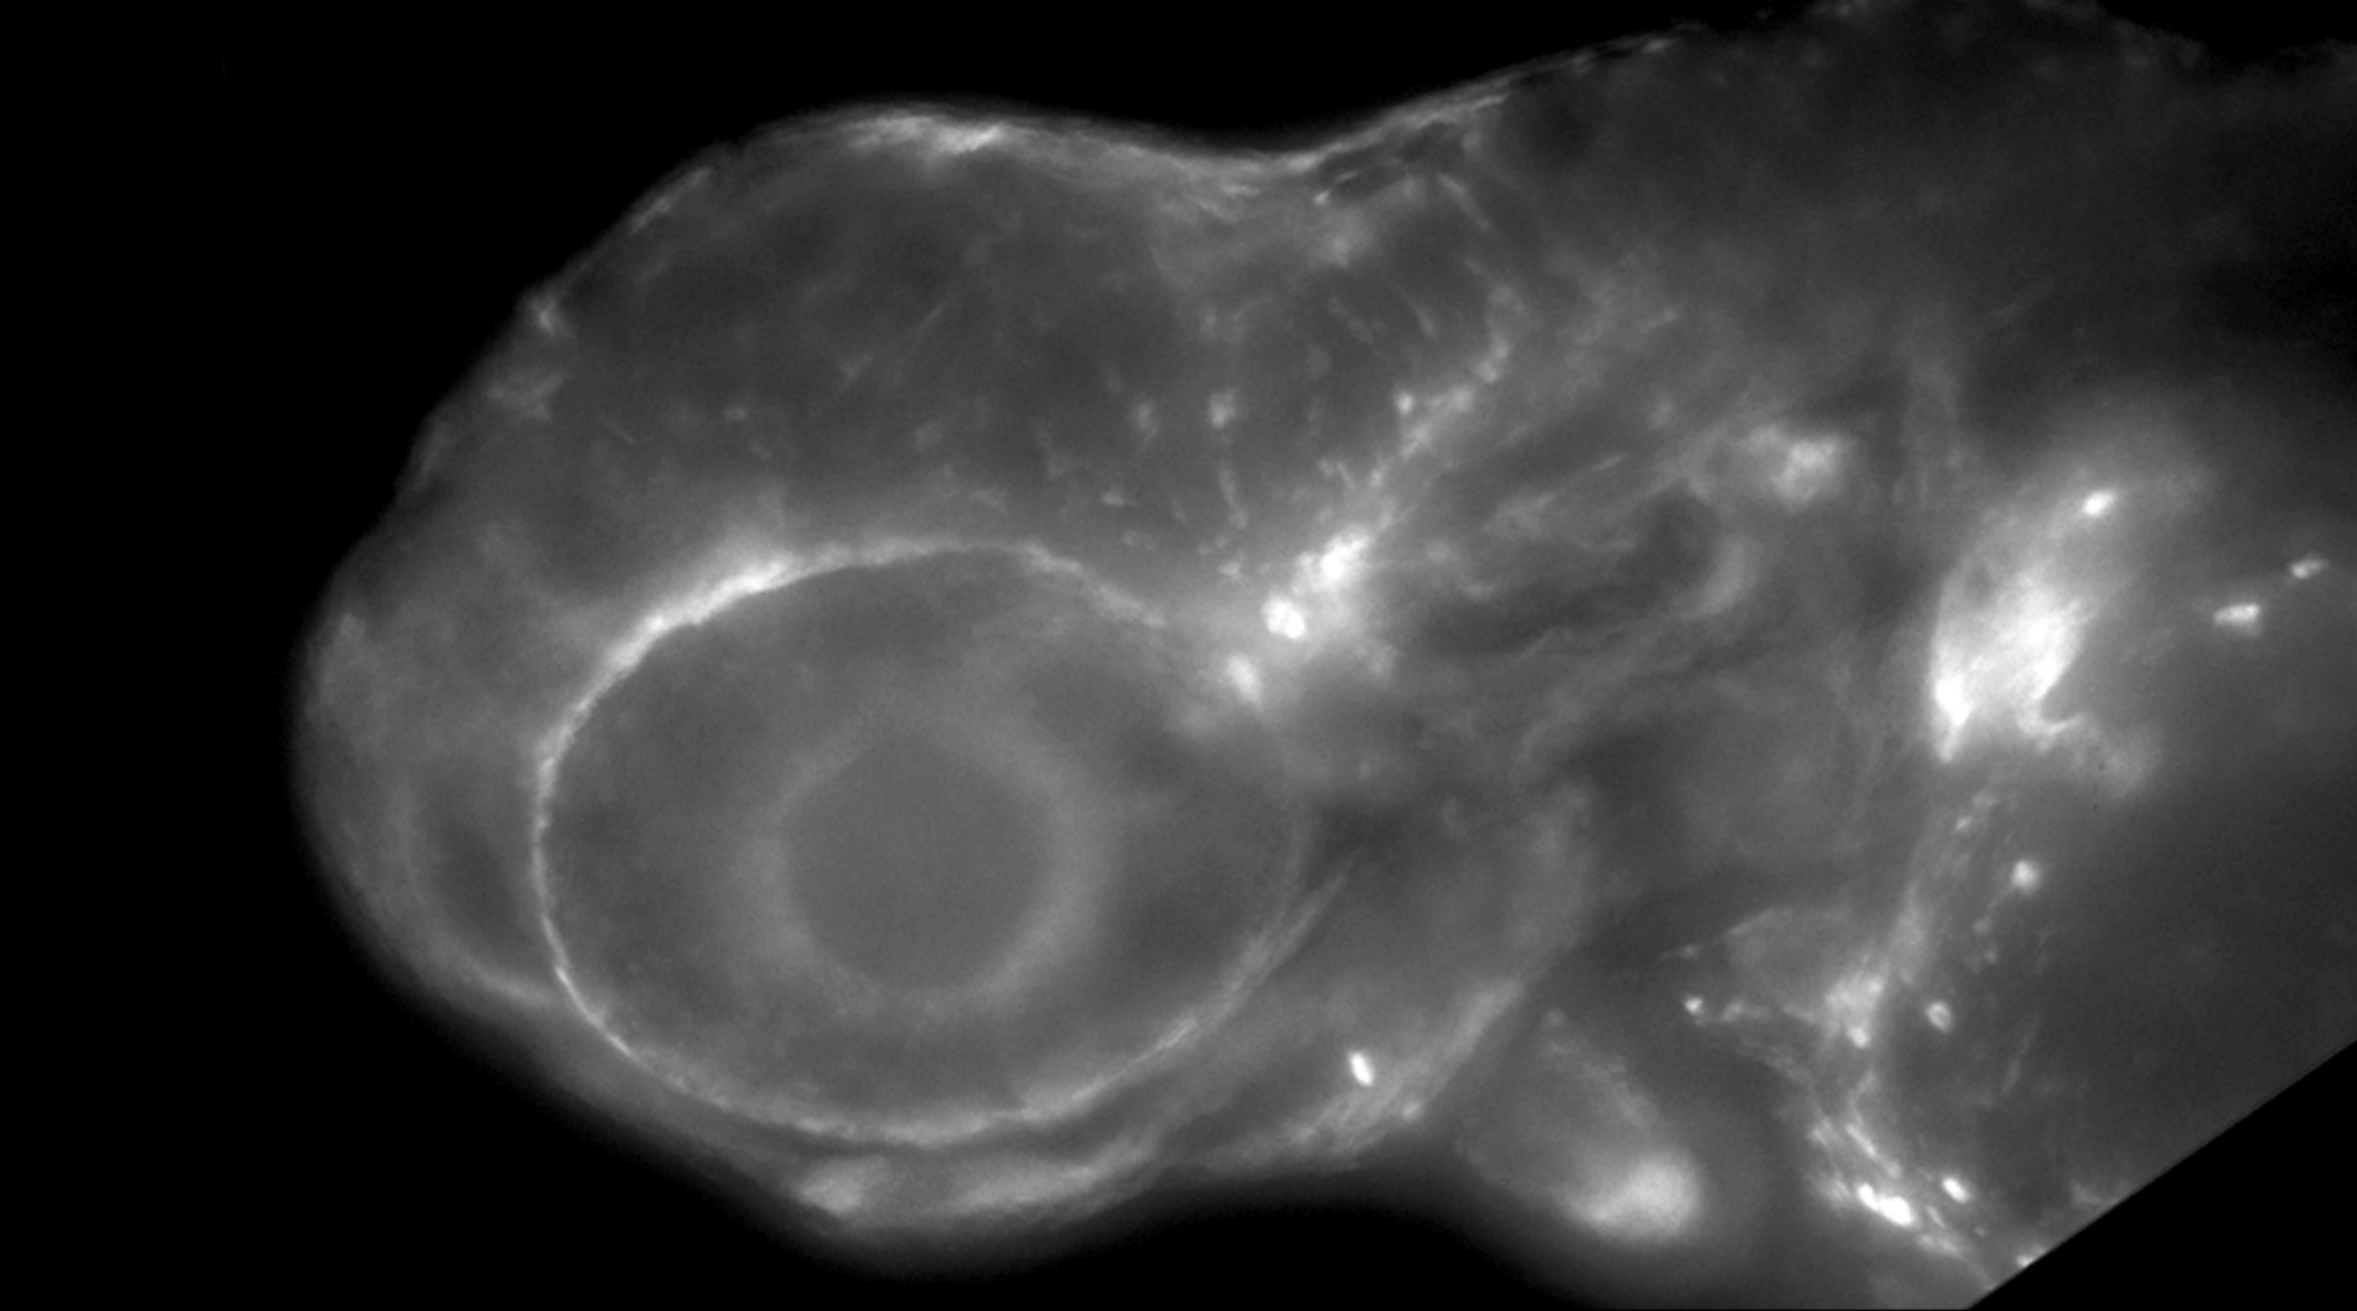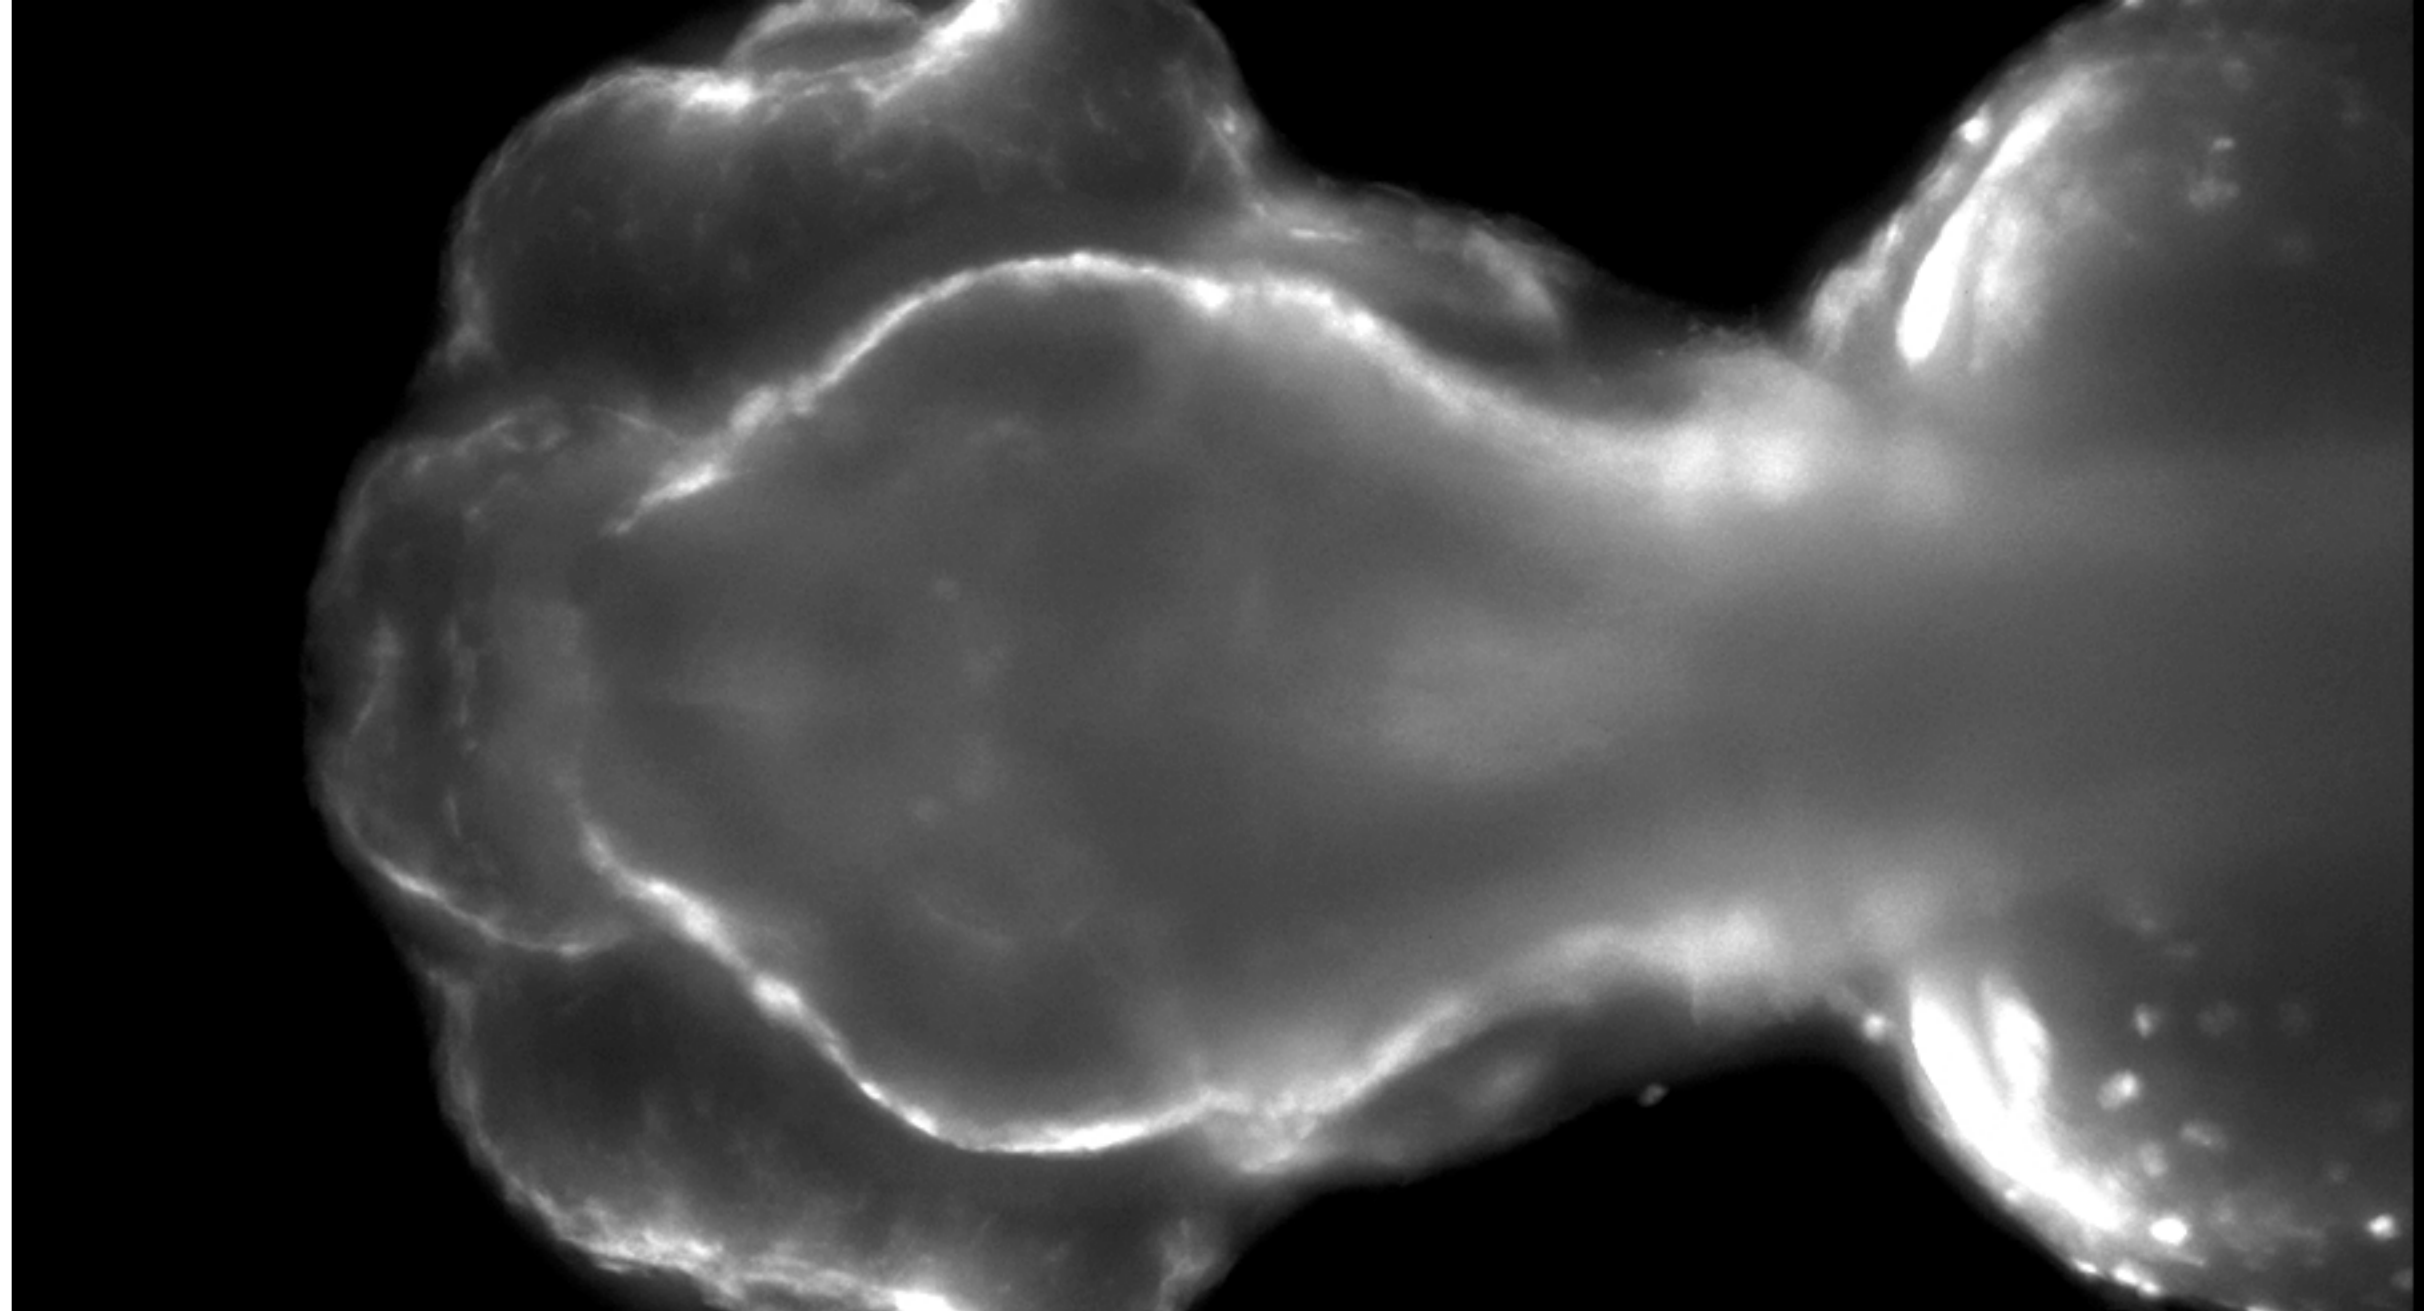

*Lmx1b*\_-79.84

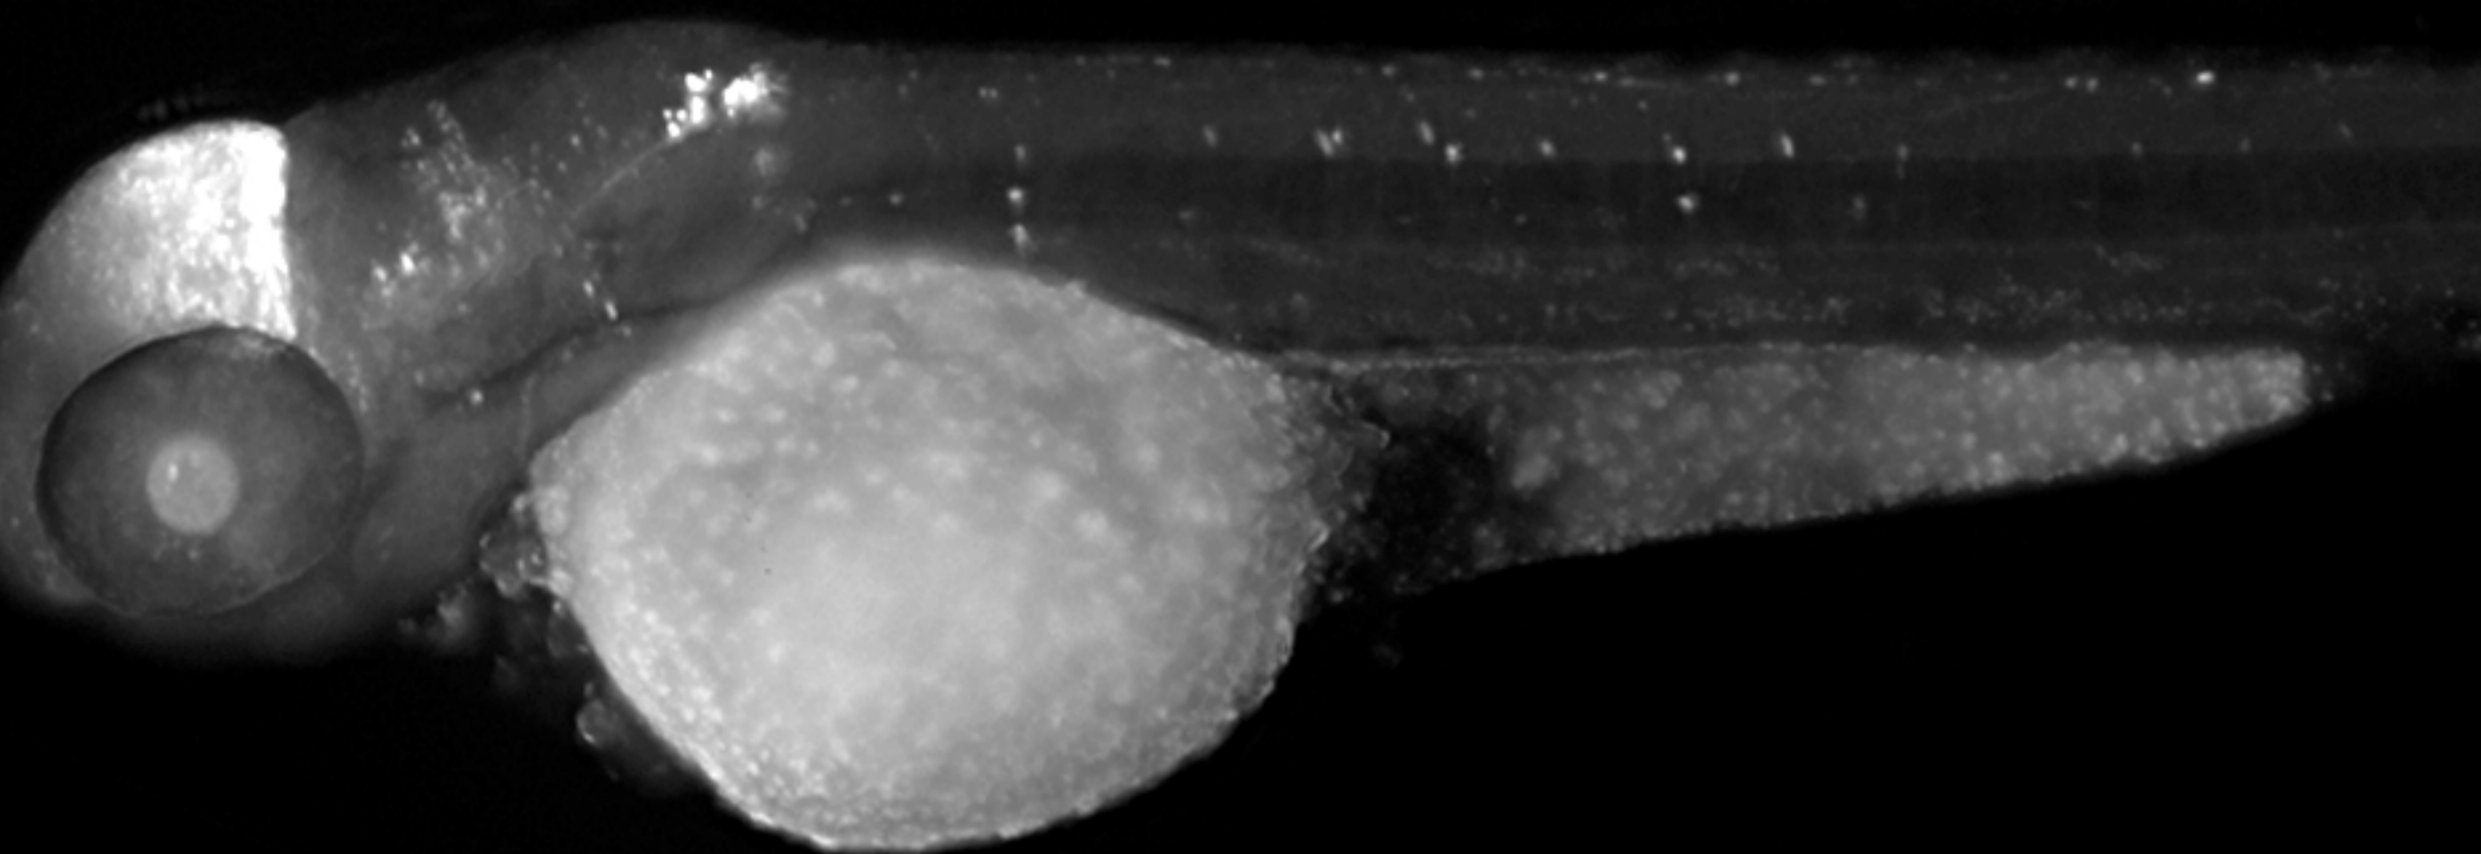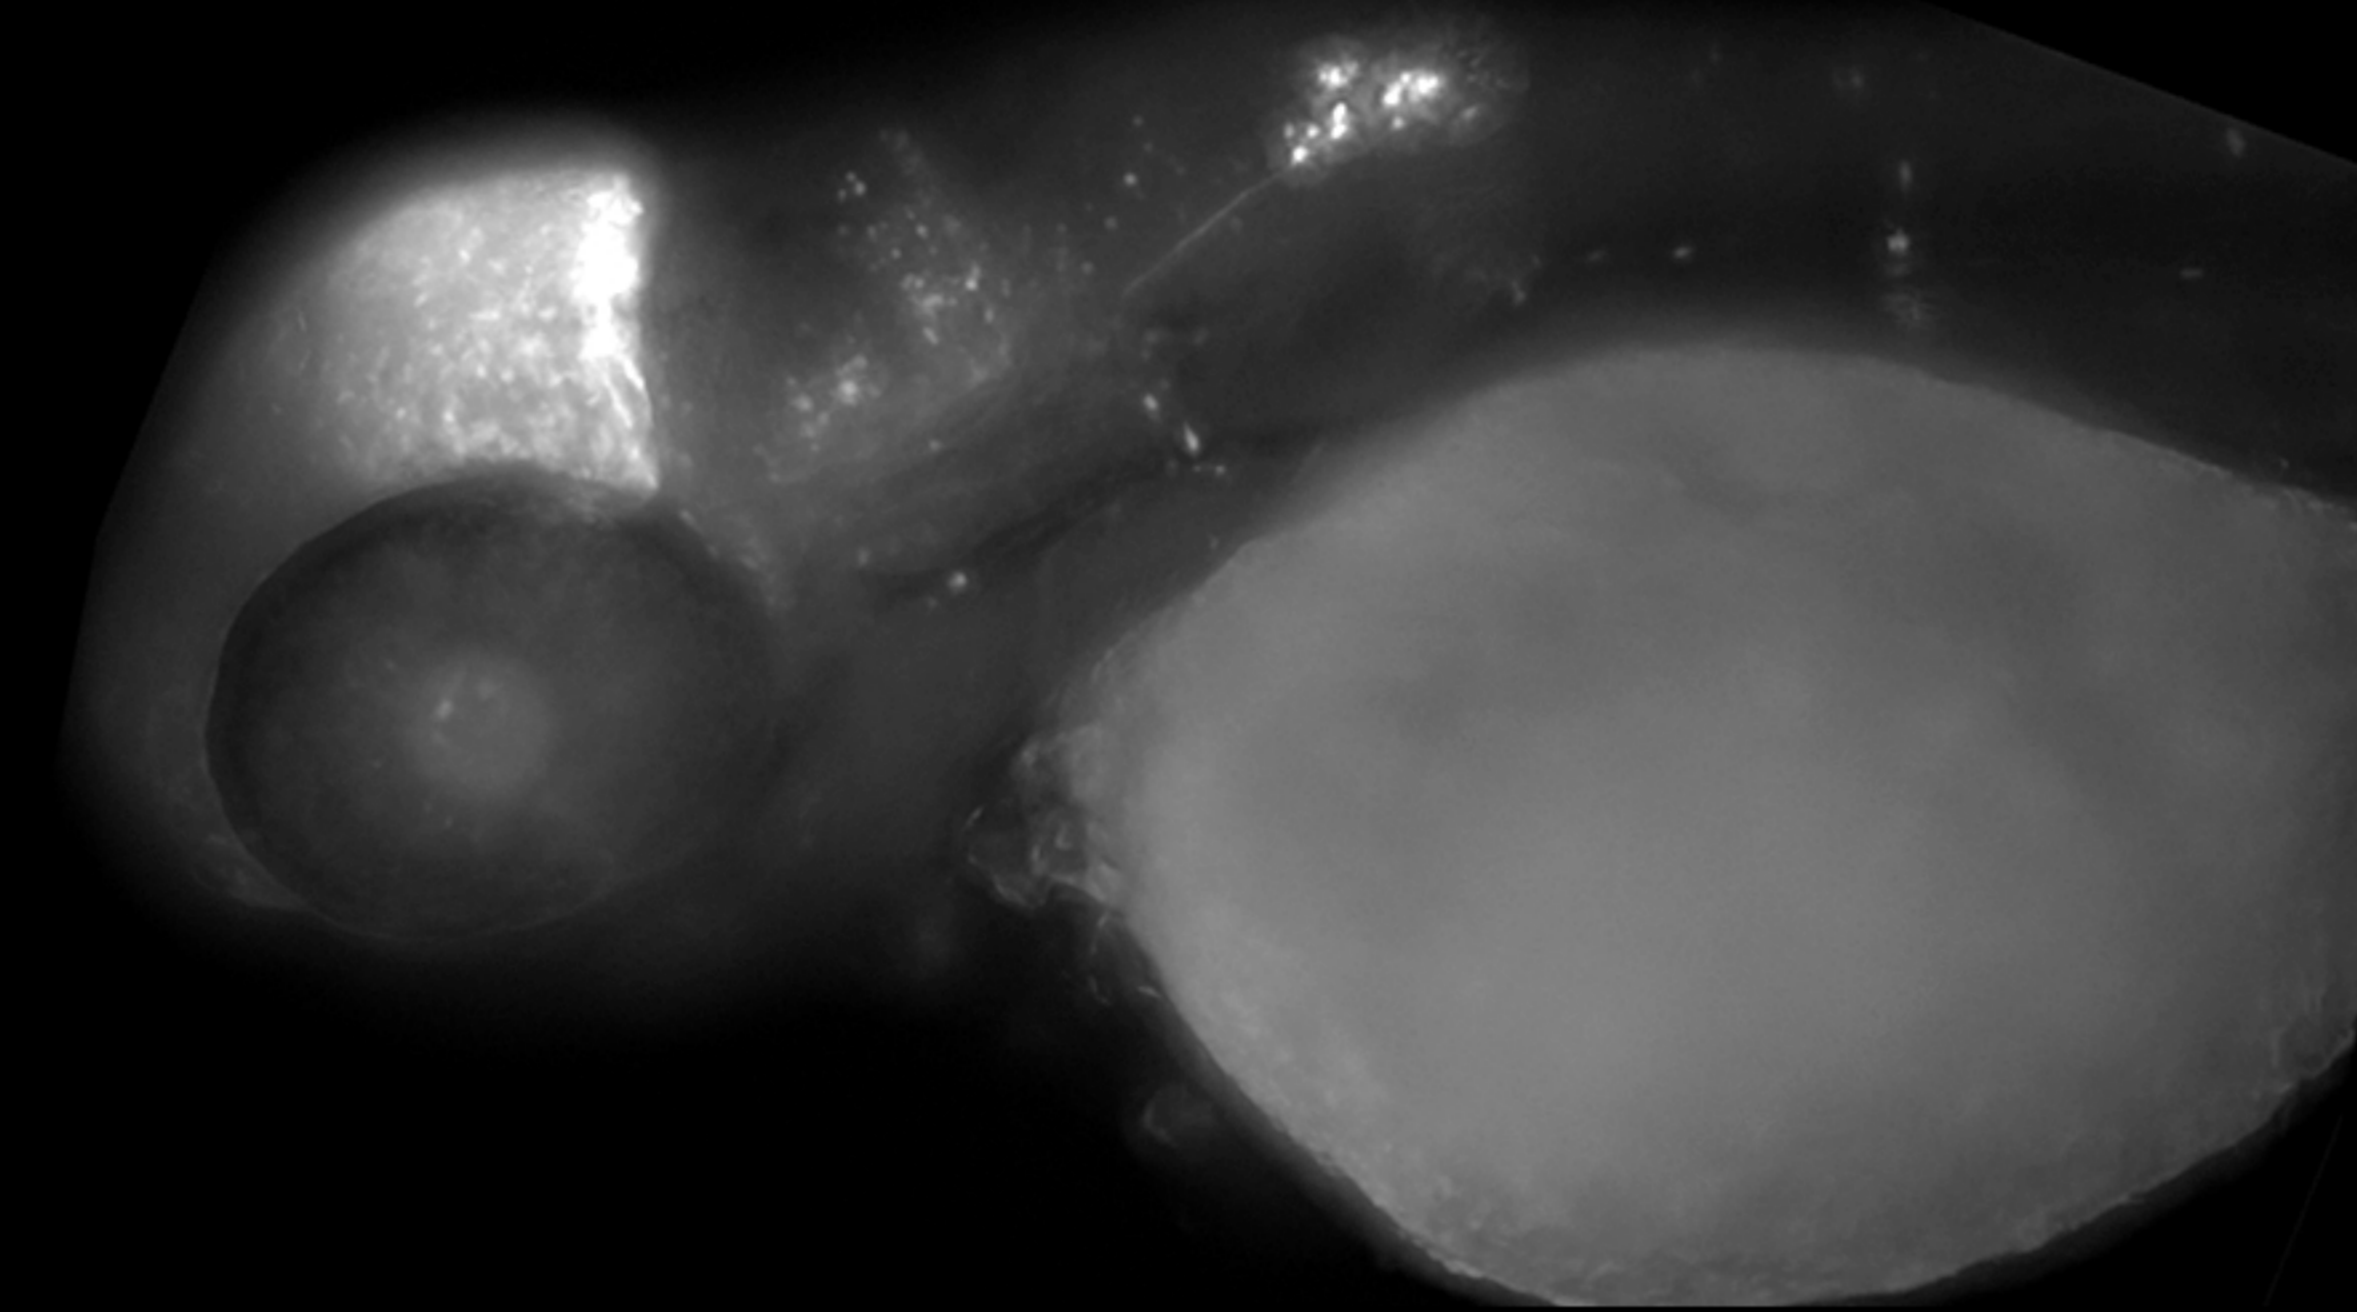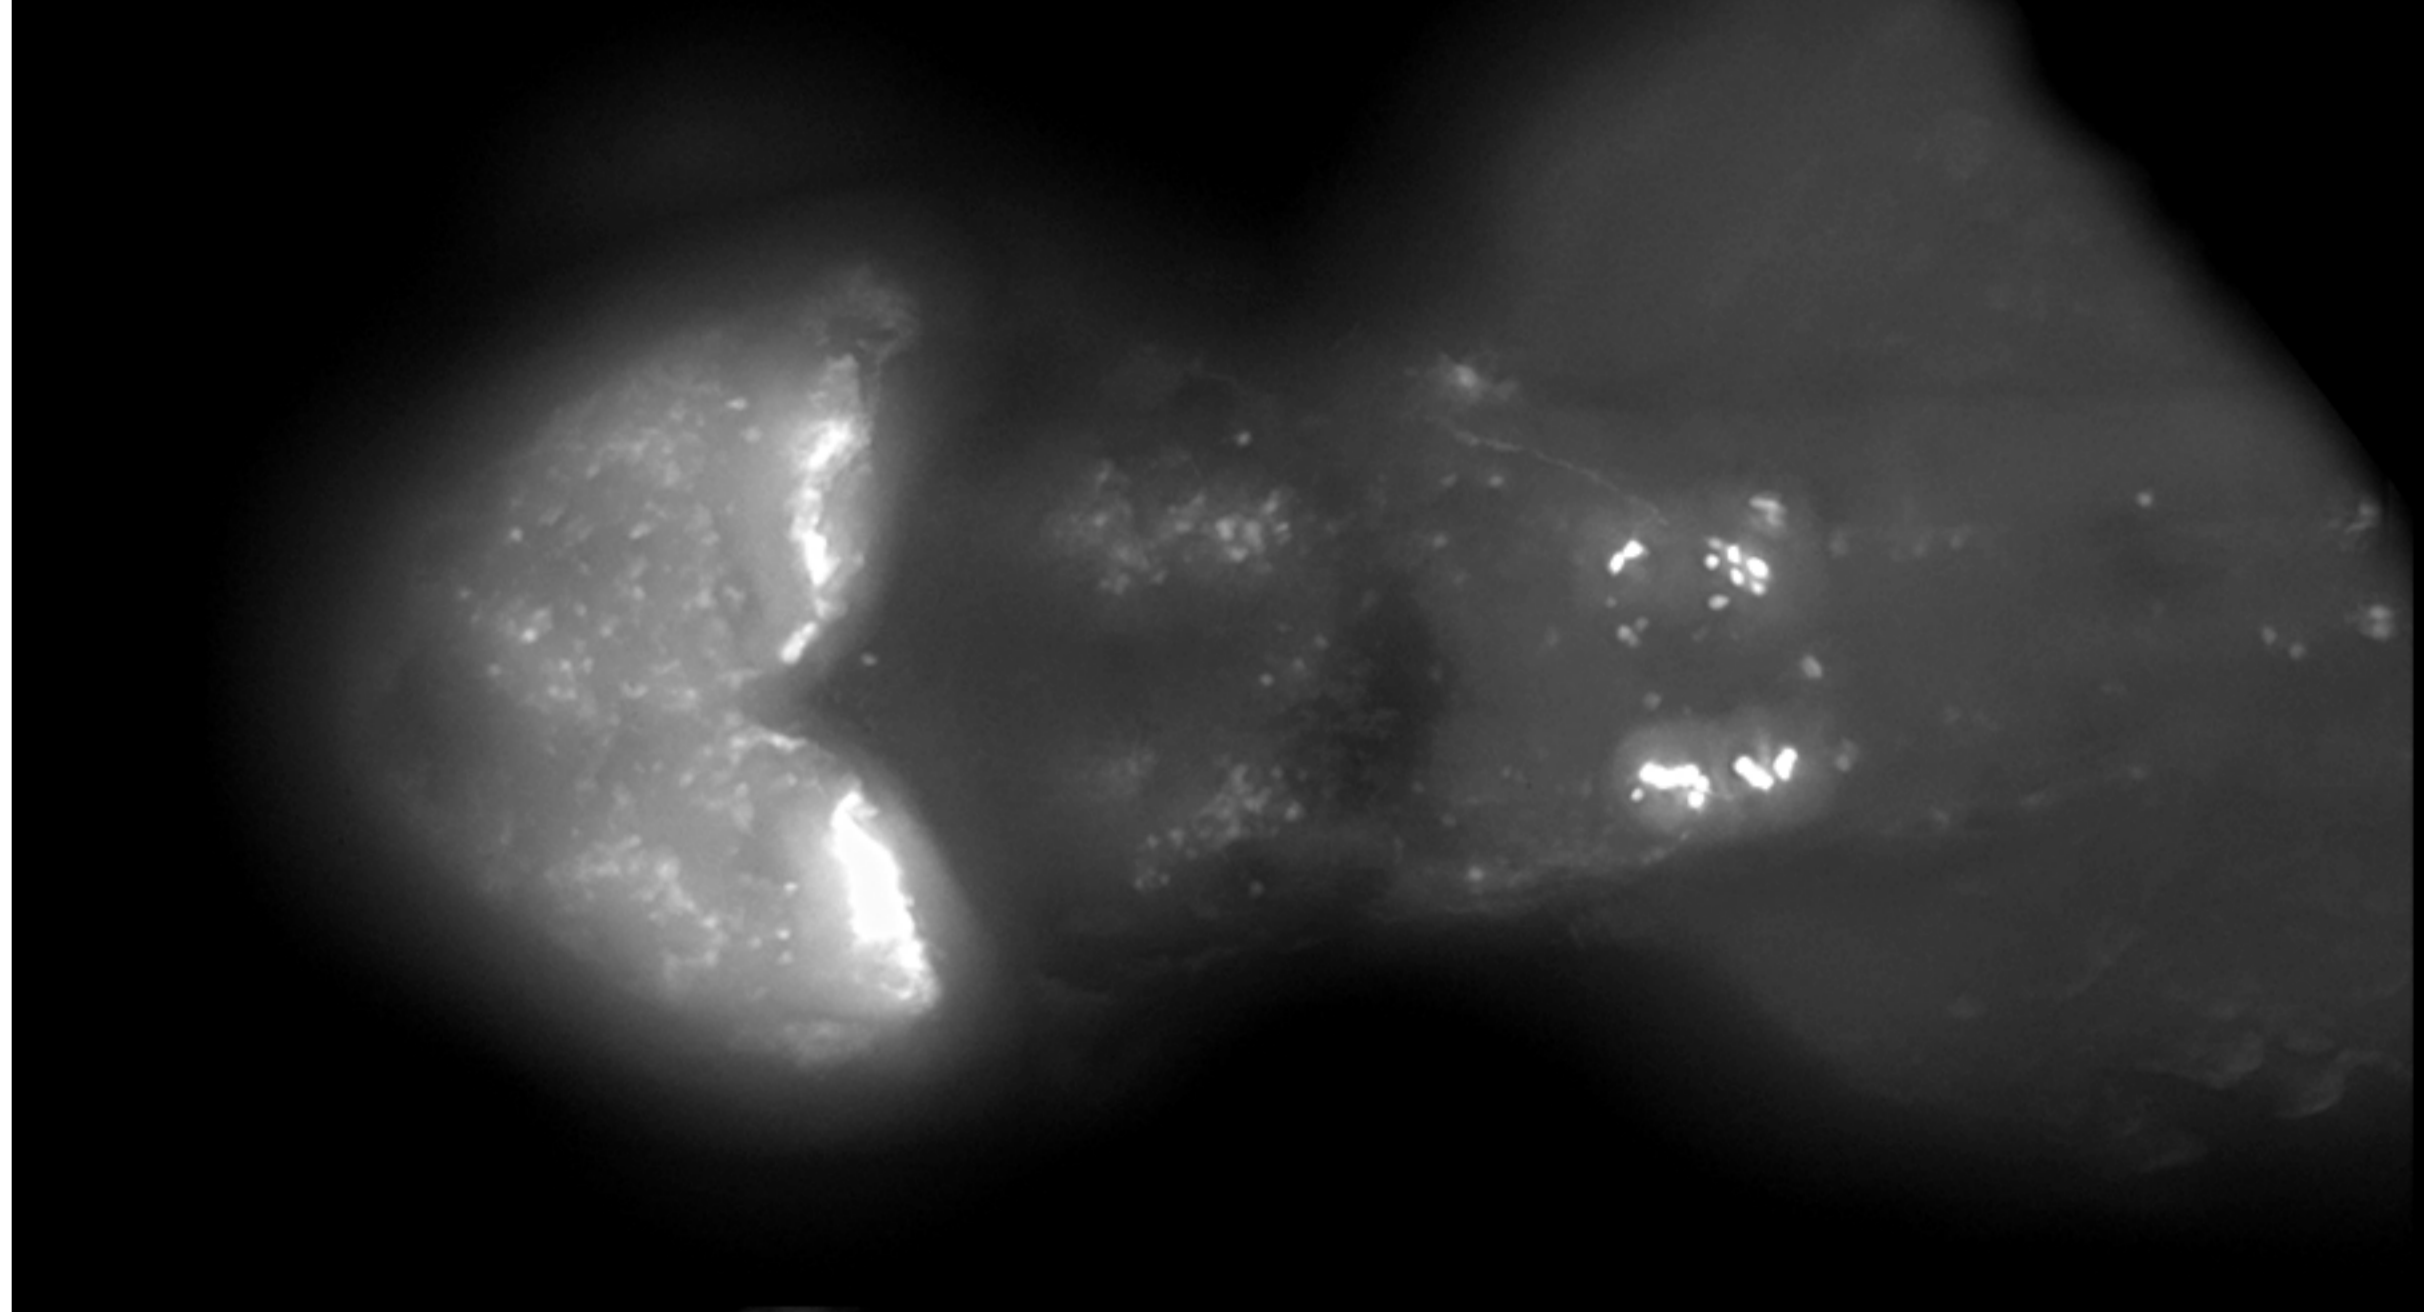

*Lmx1b*\_12.07

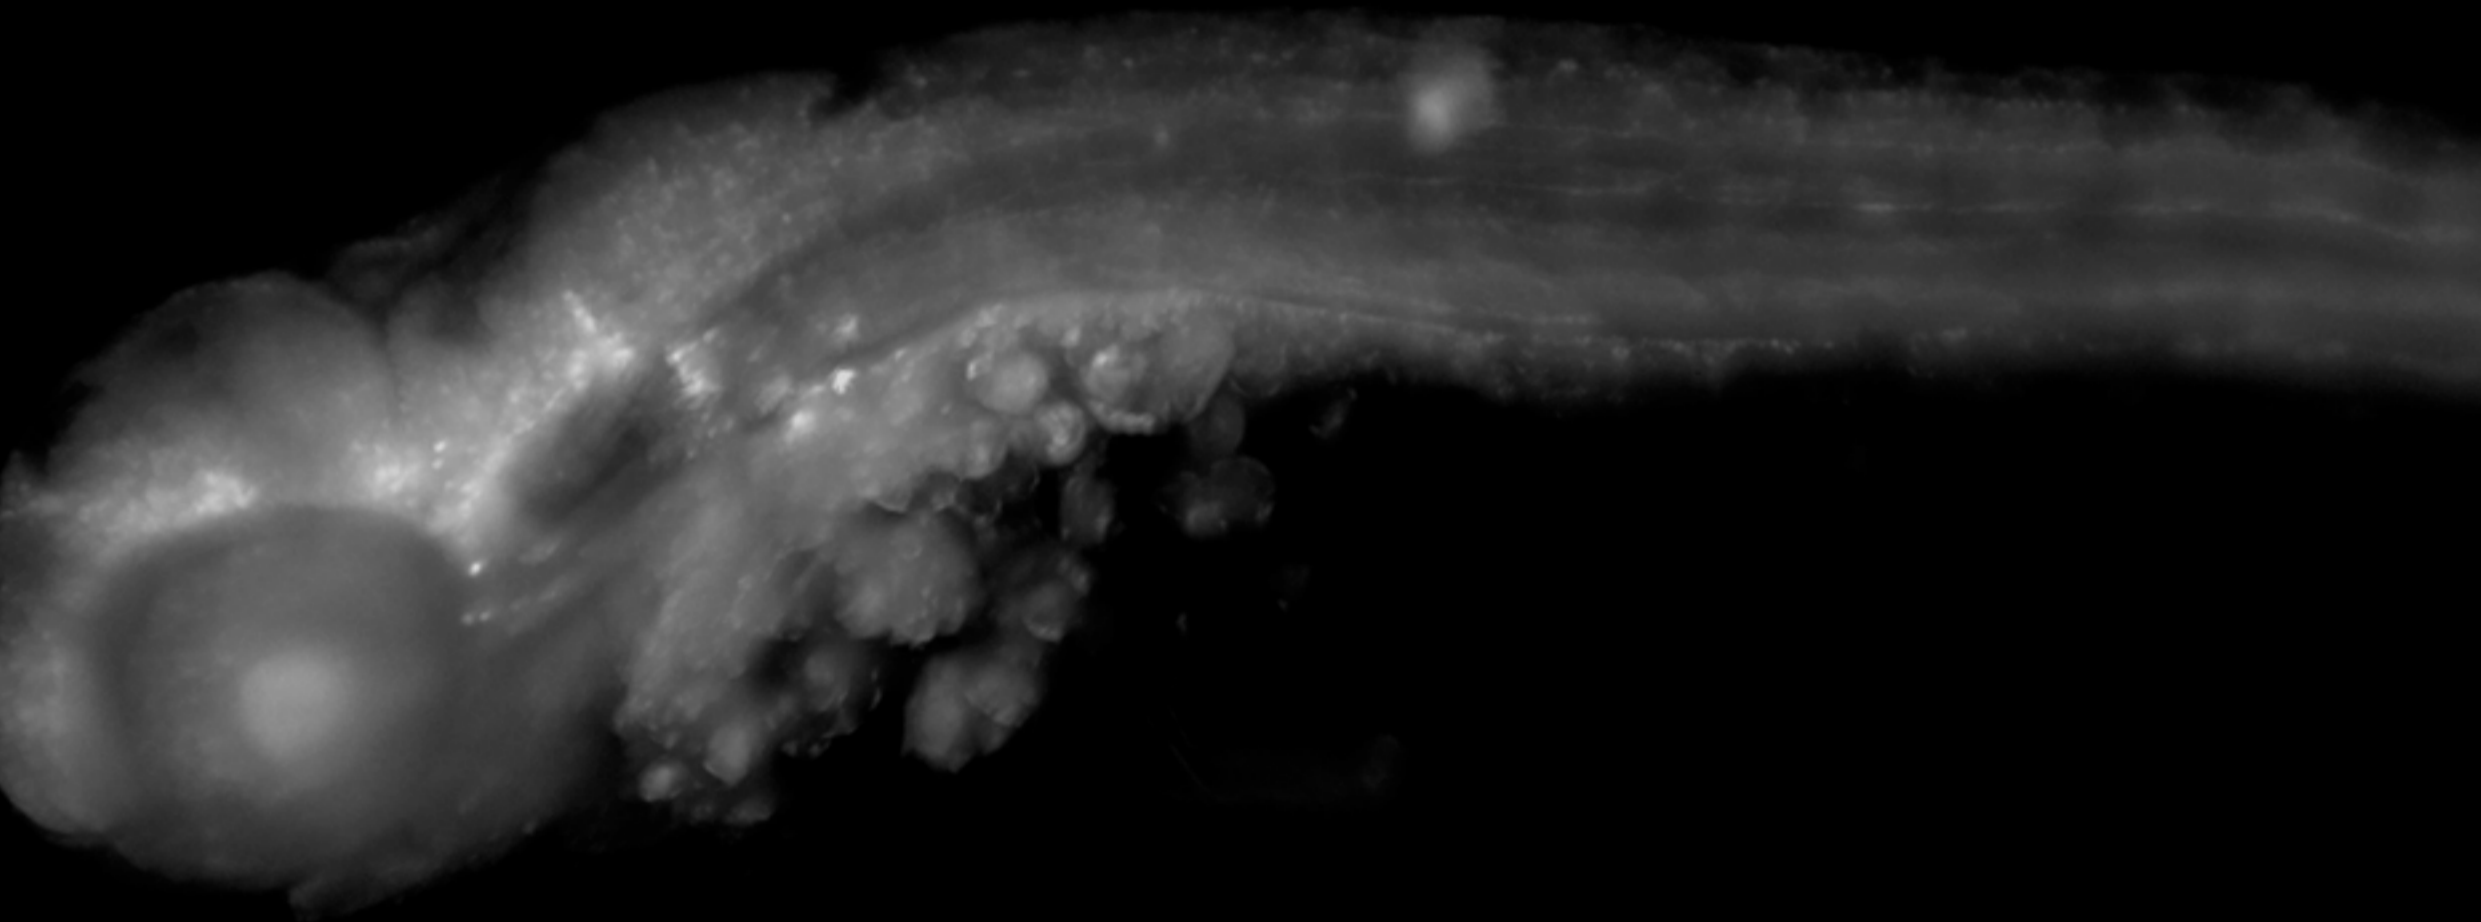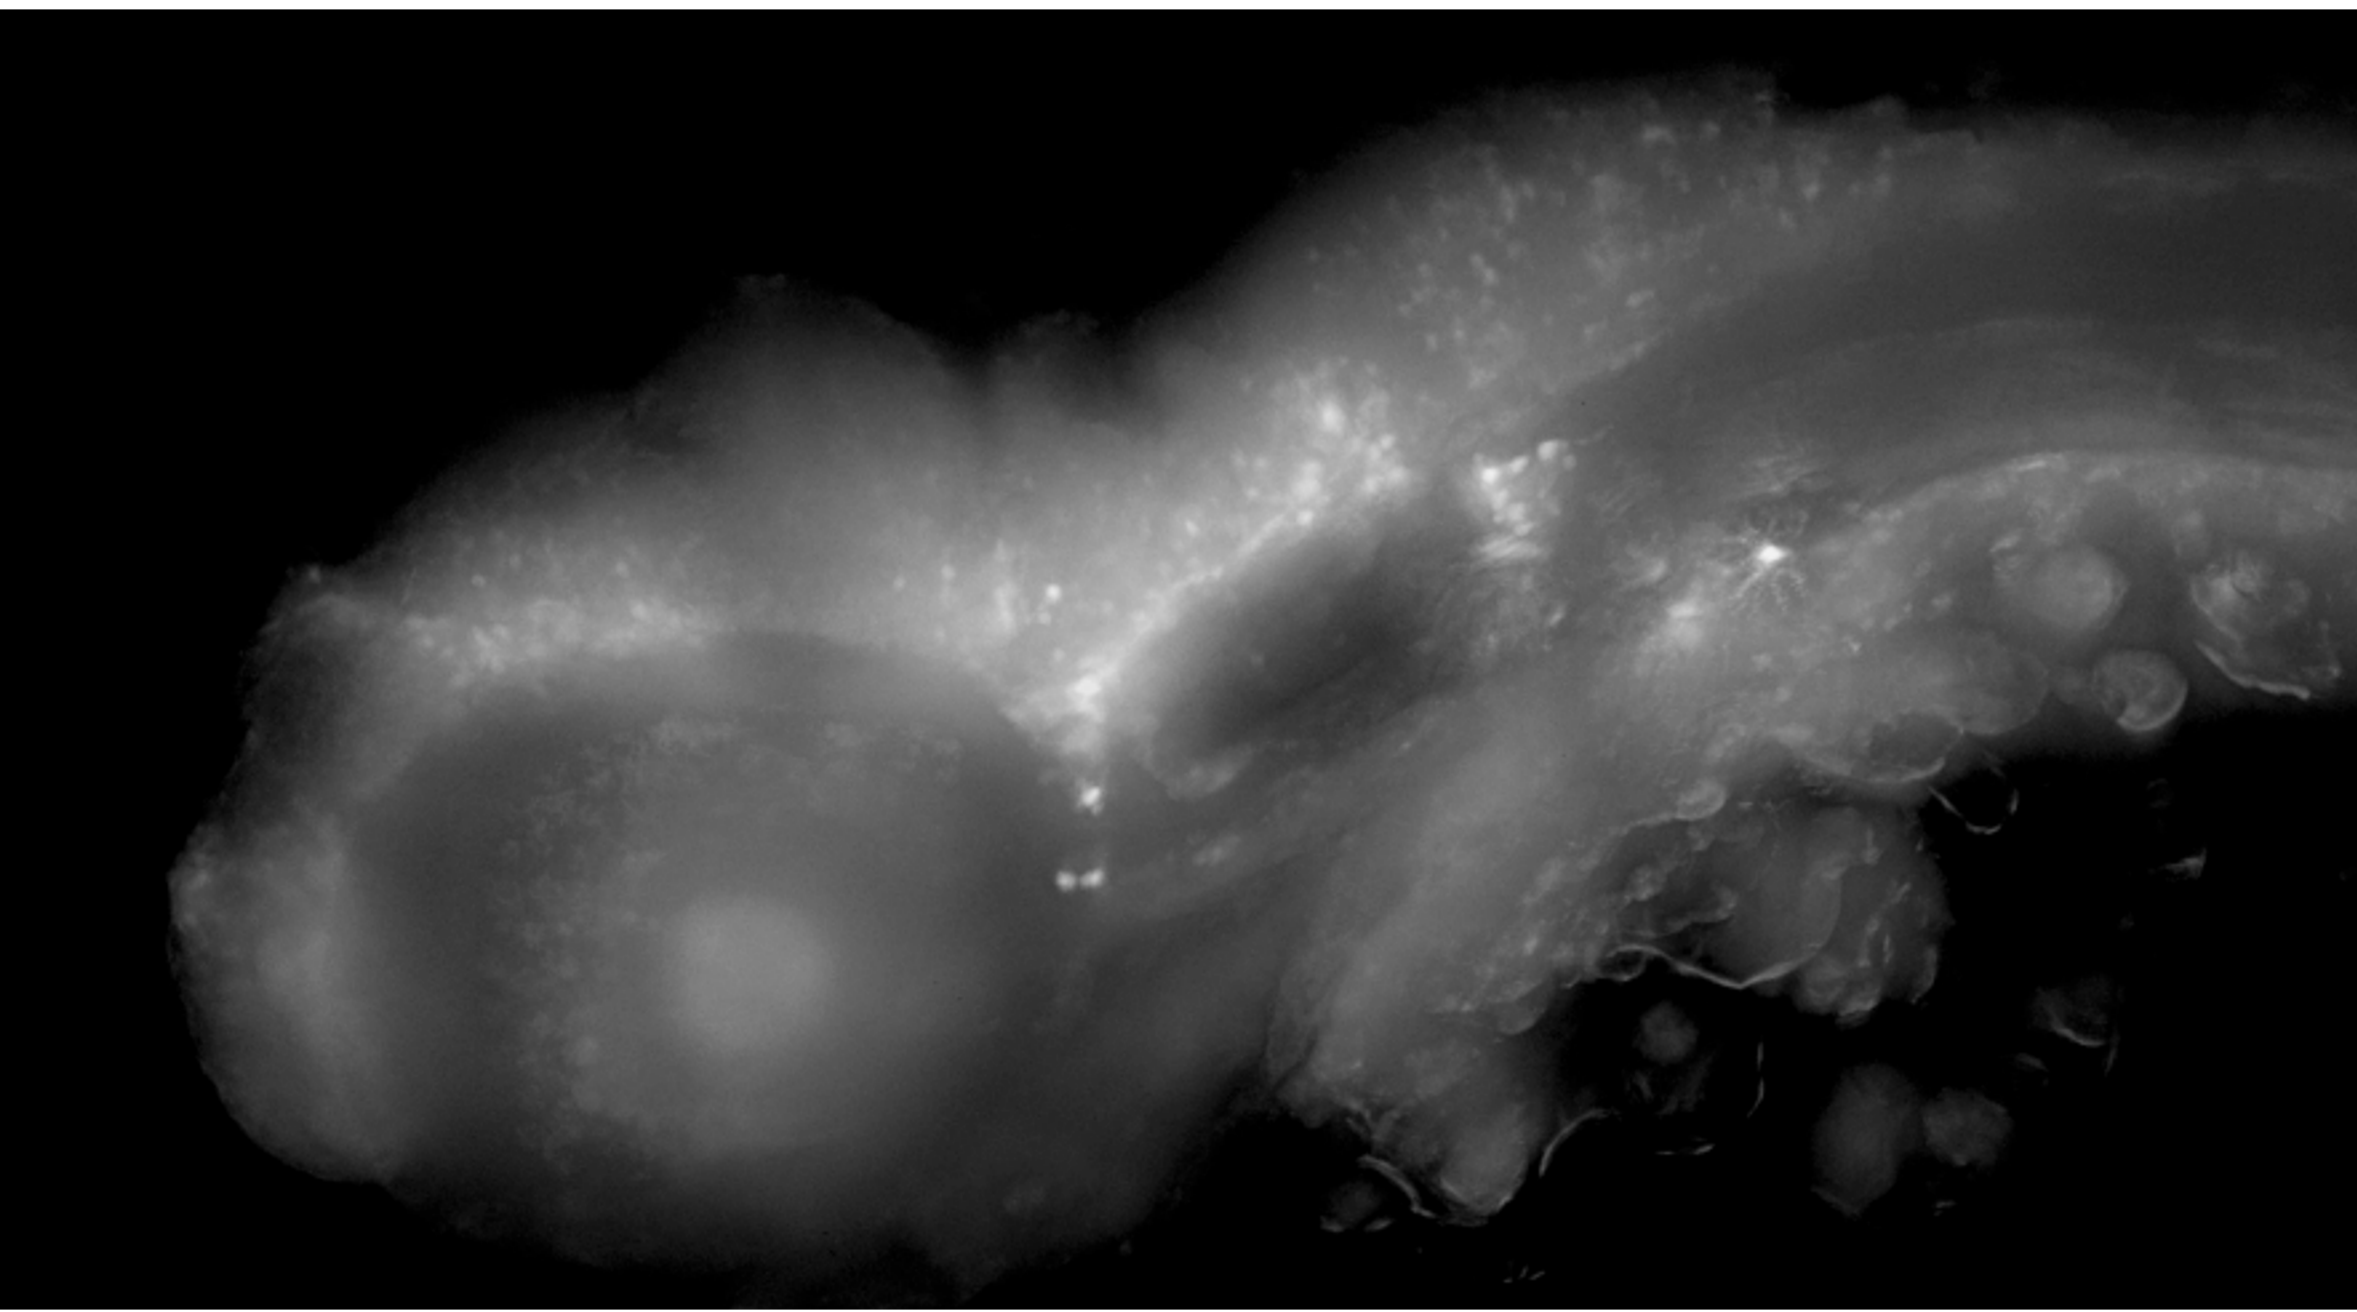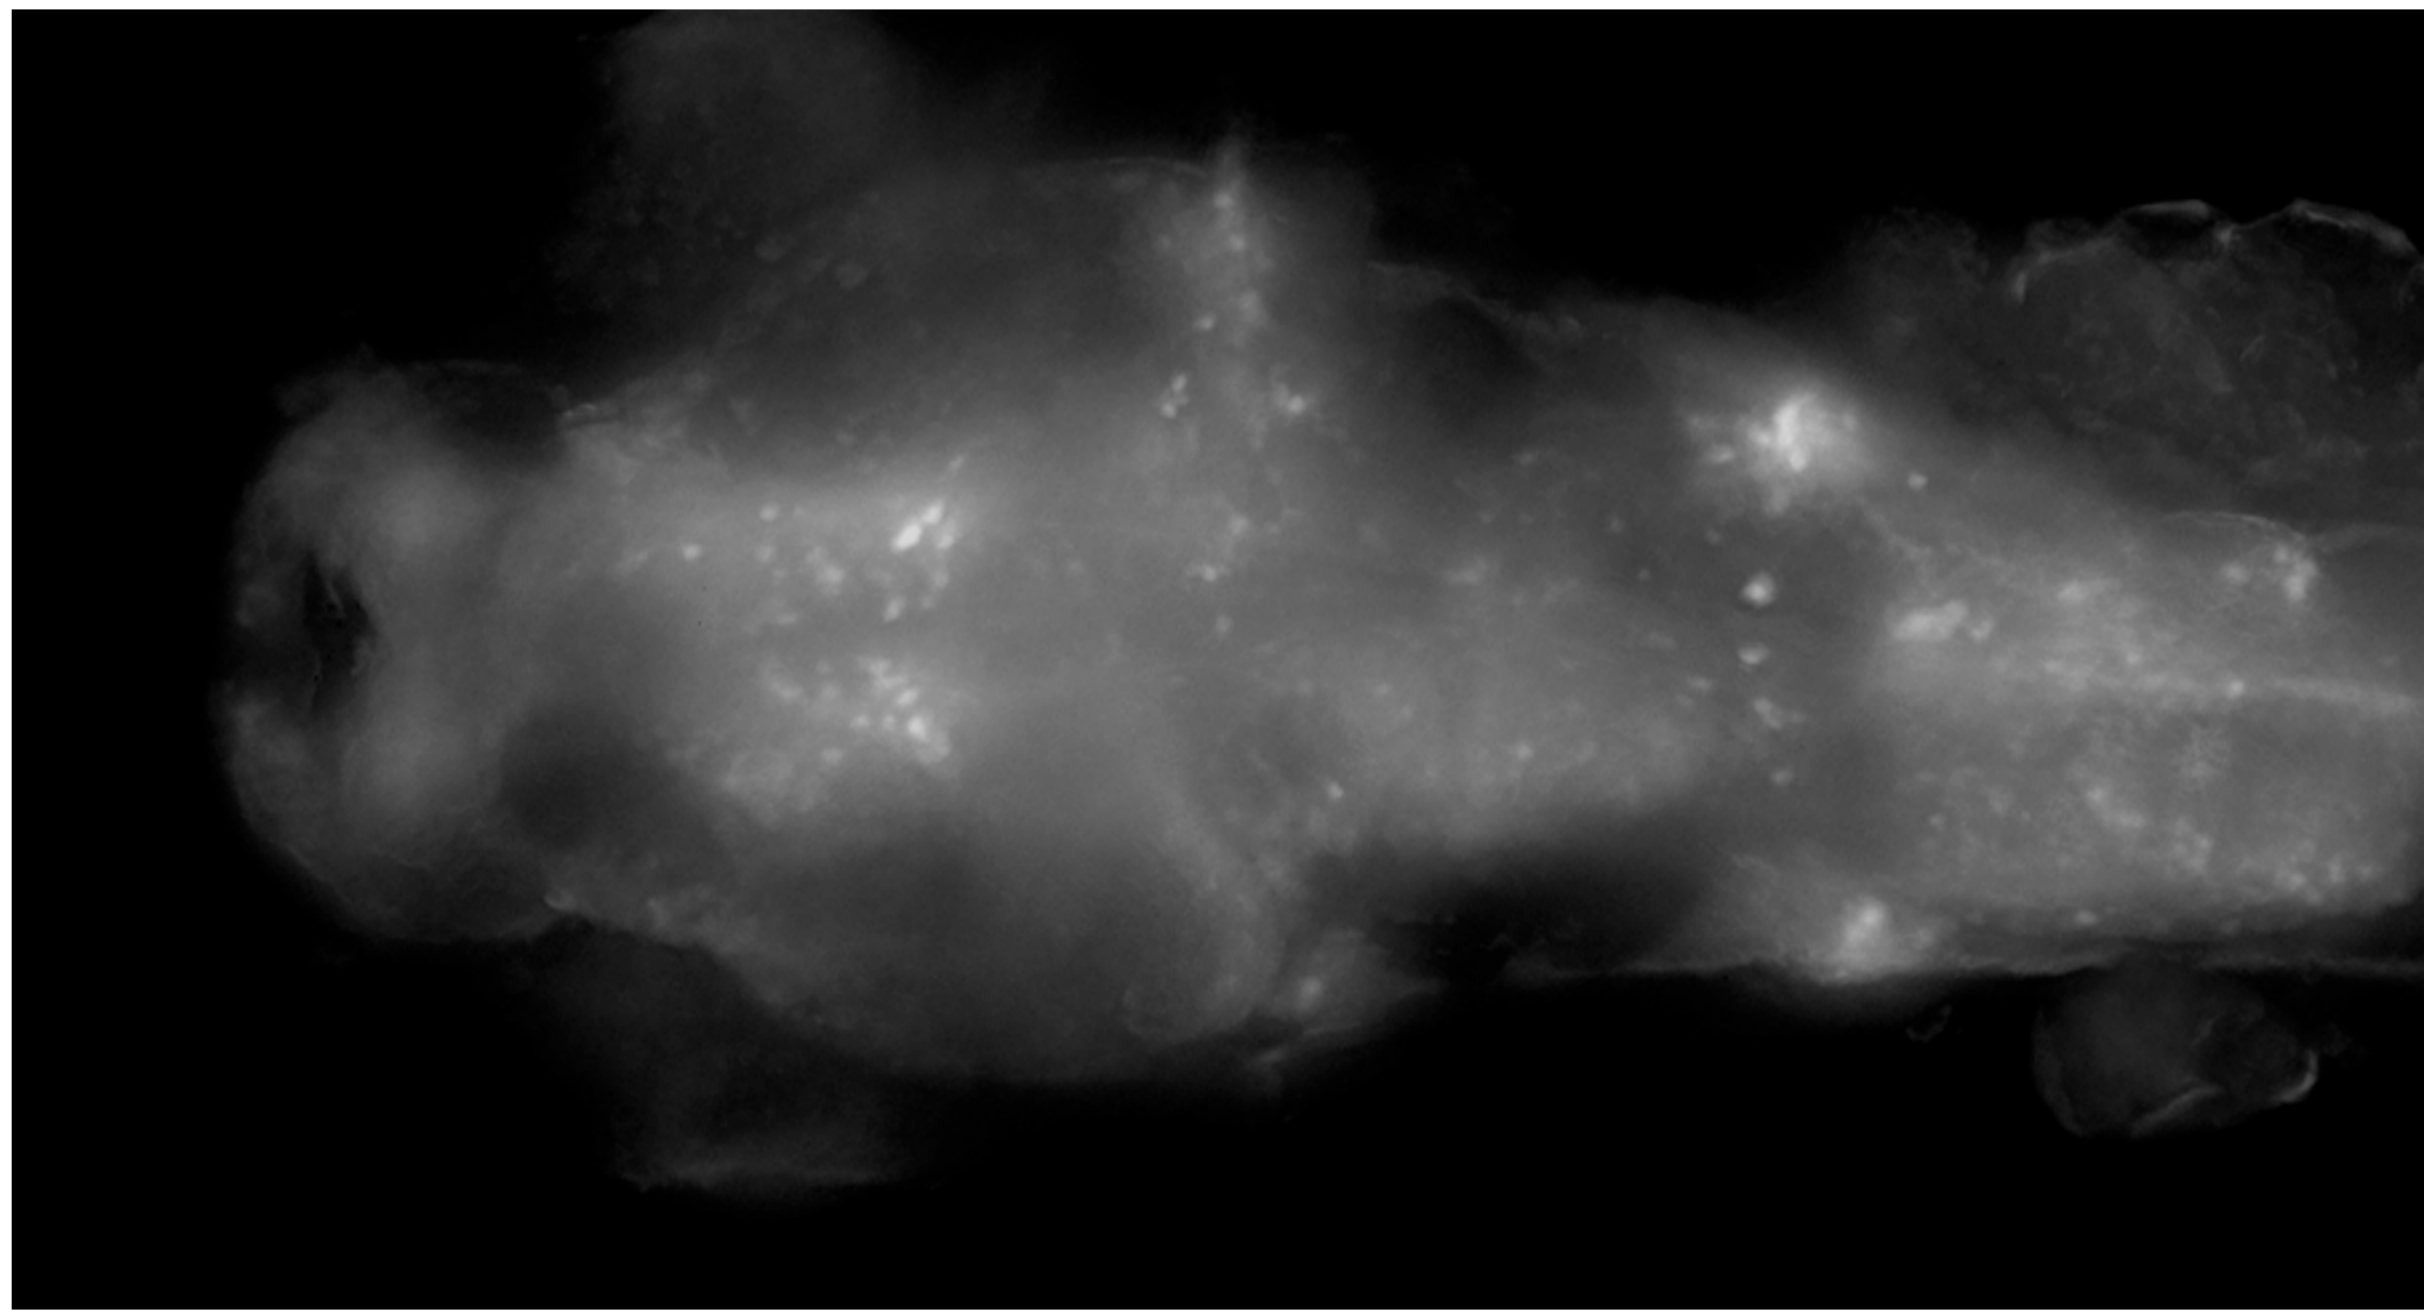

*Lmx1b*\_28.46

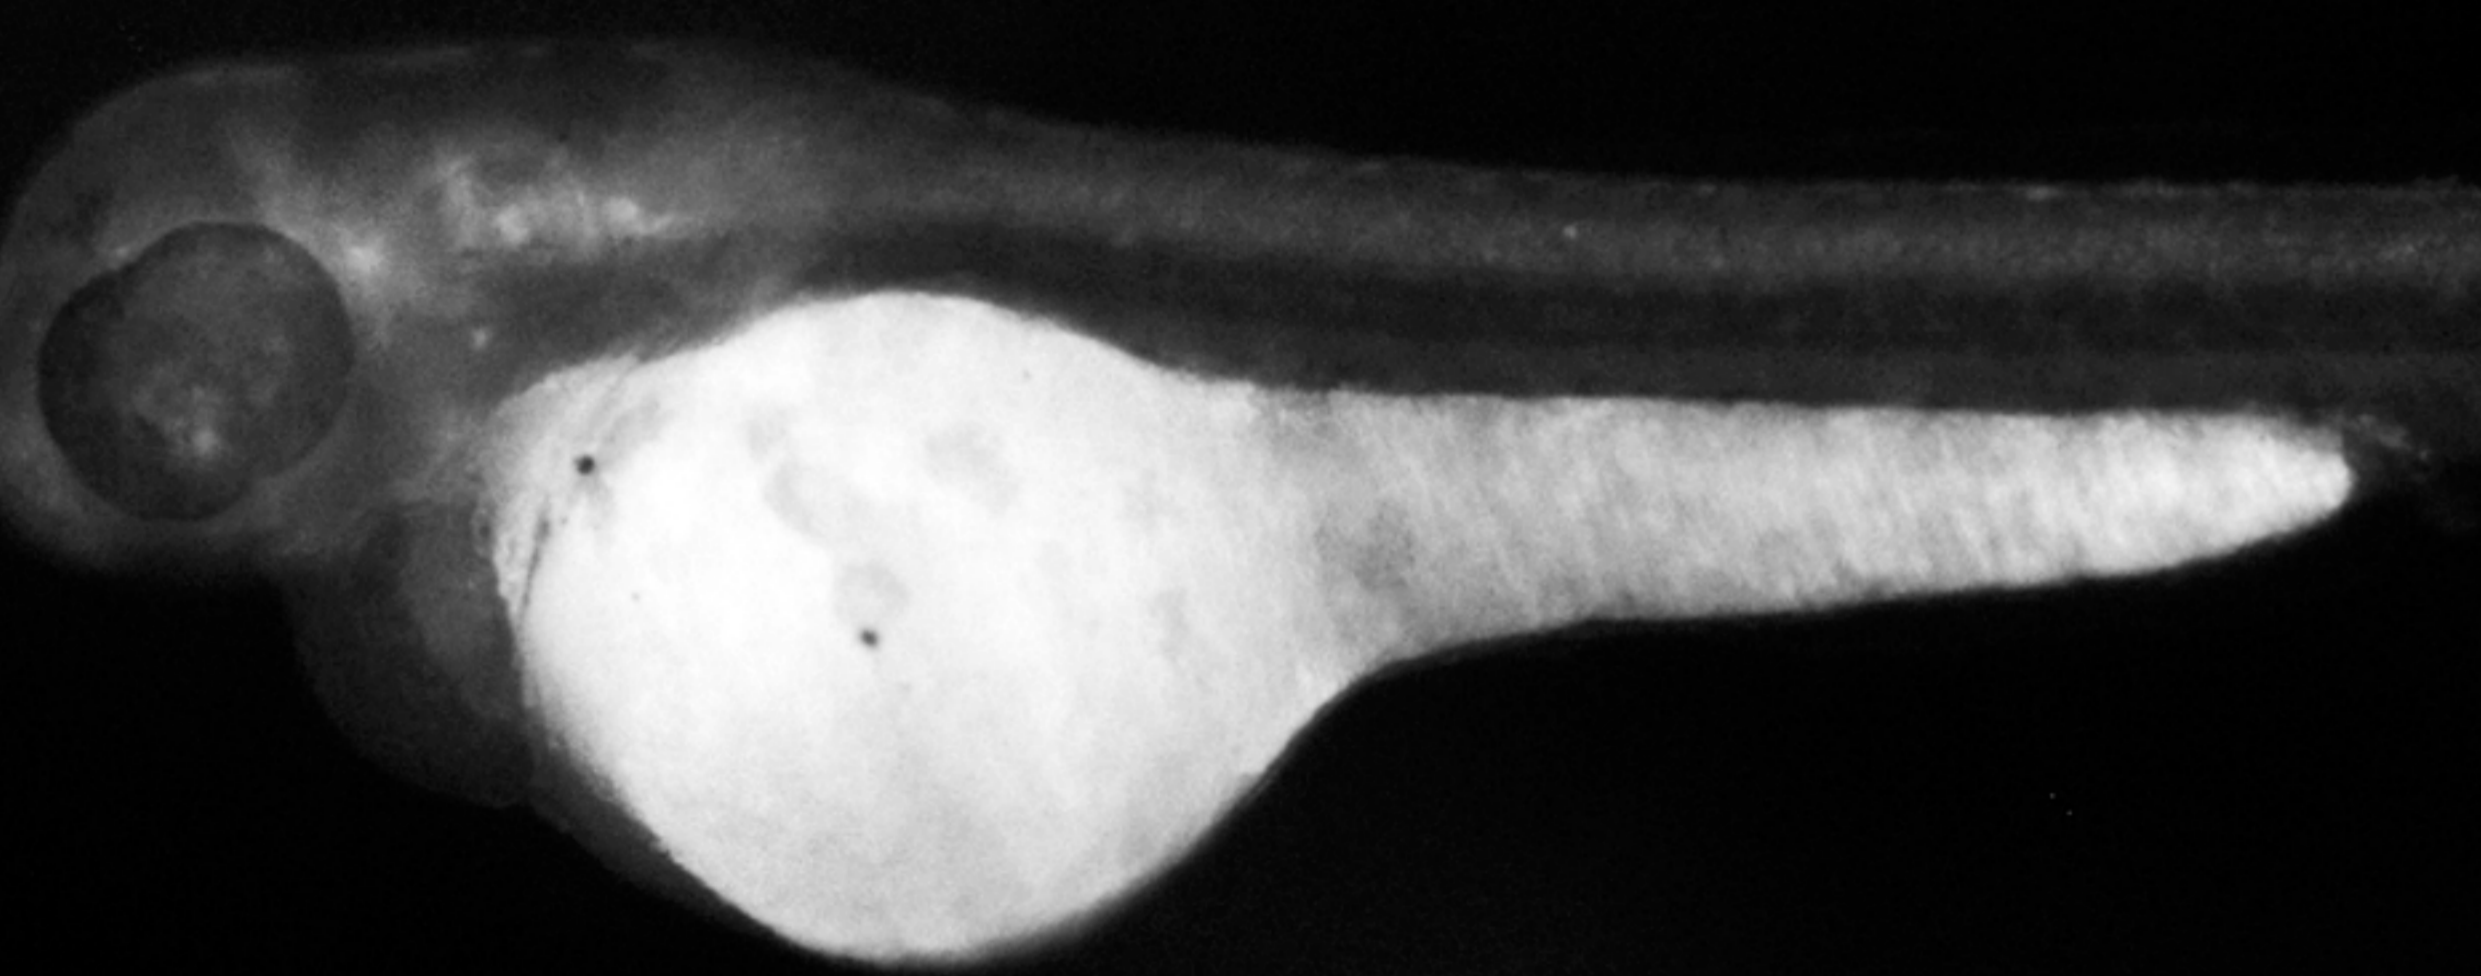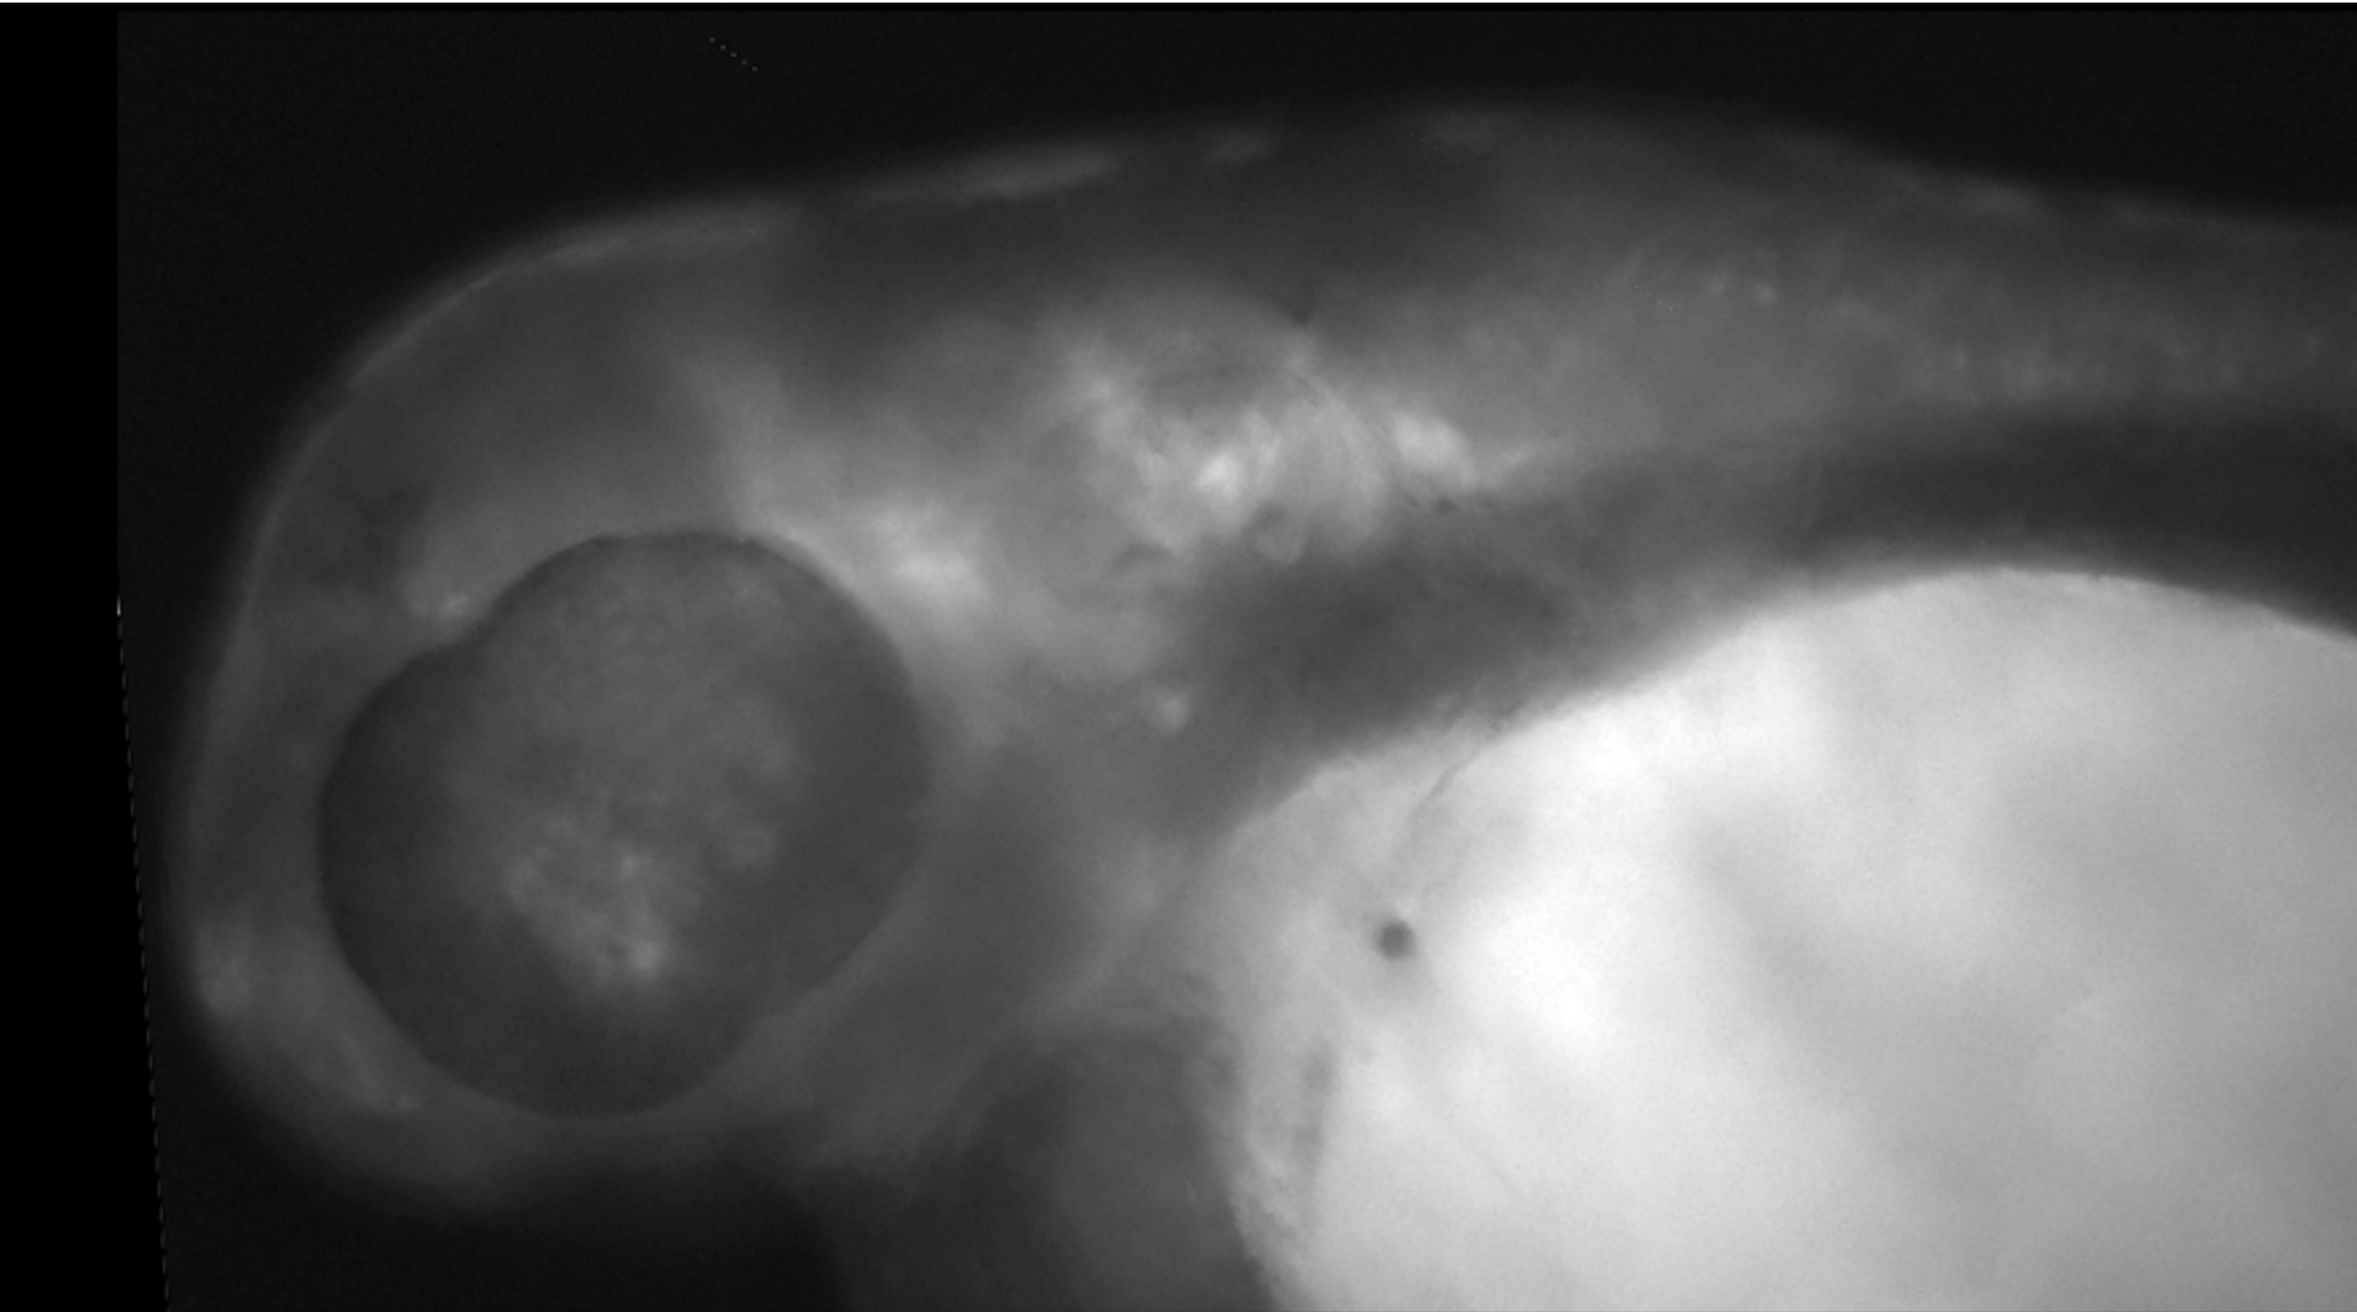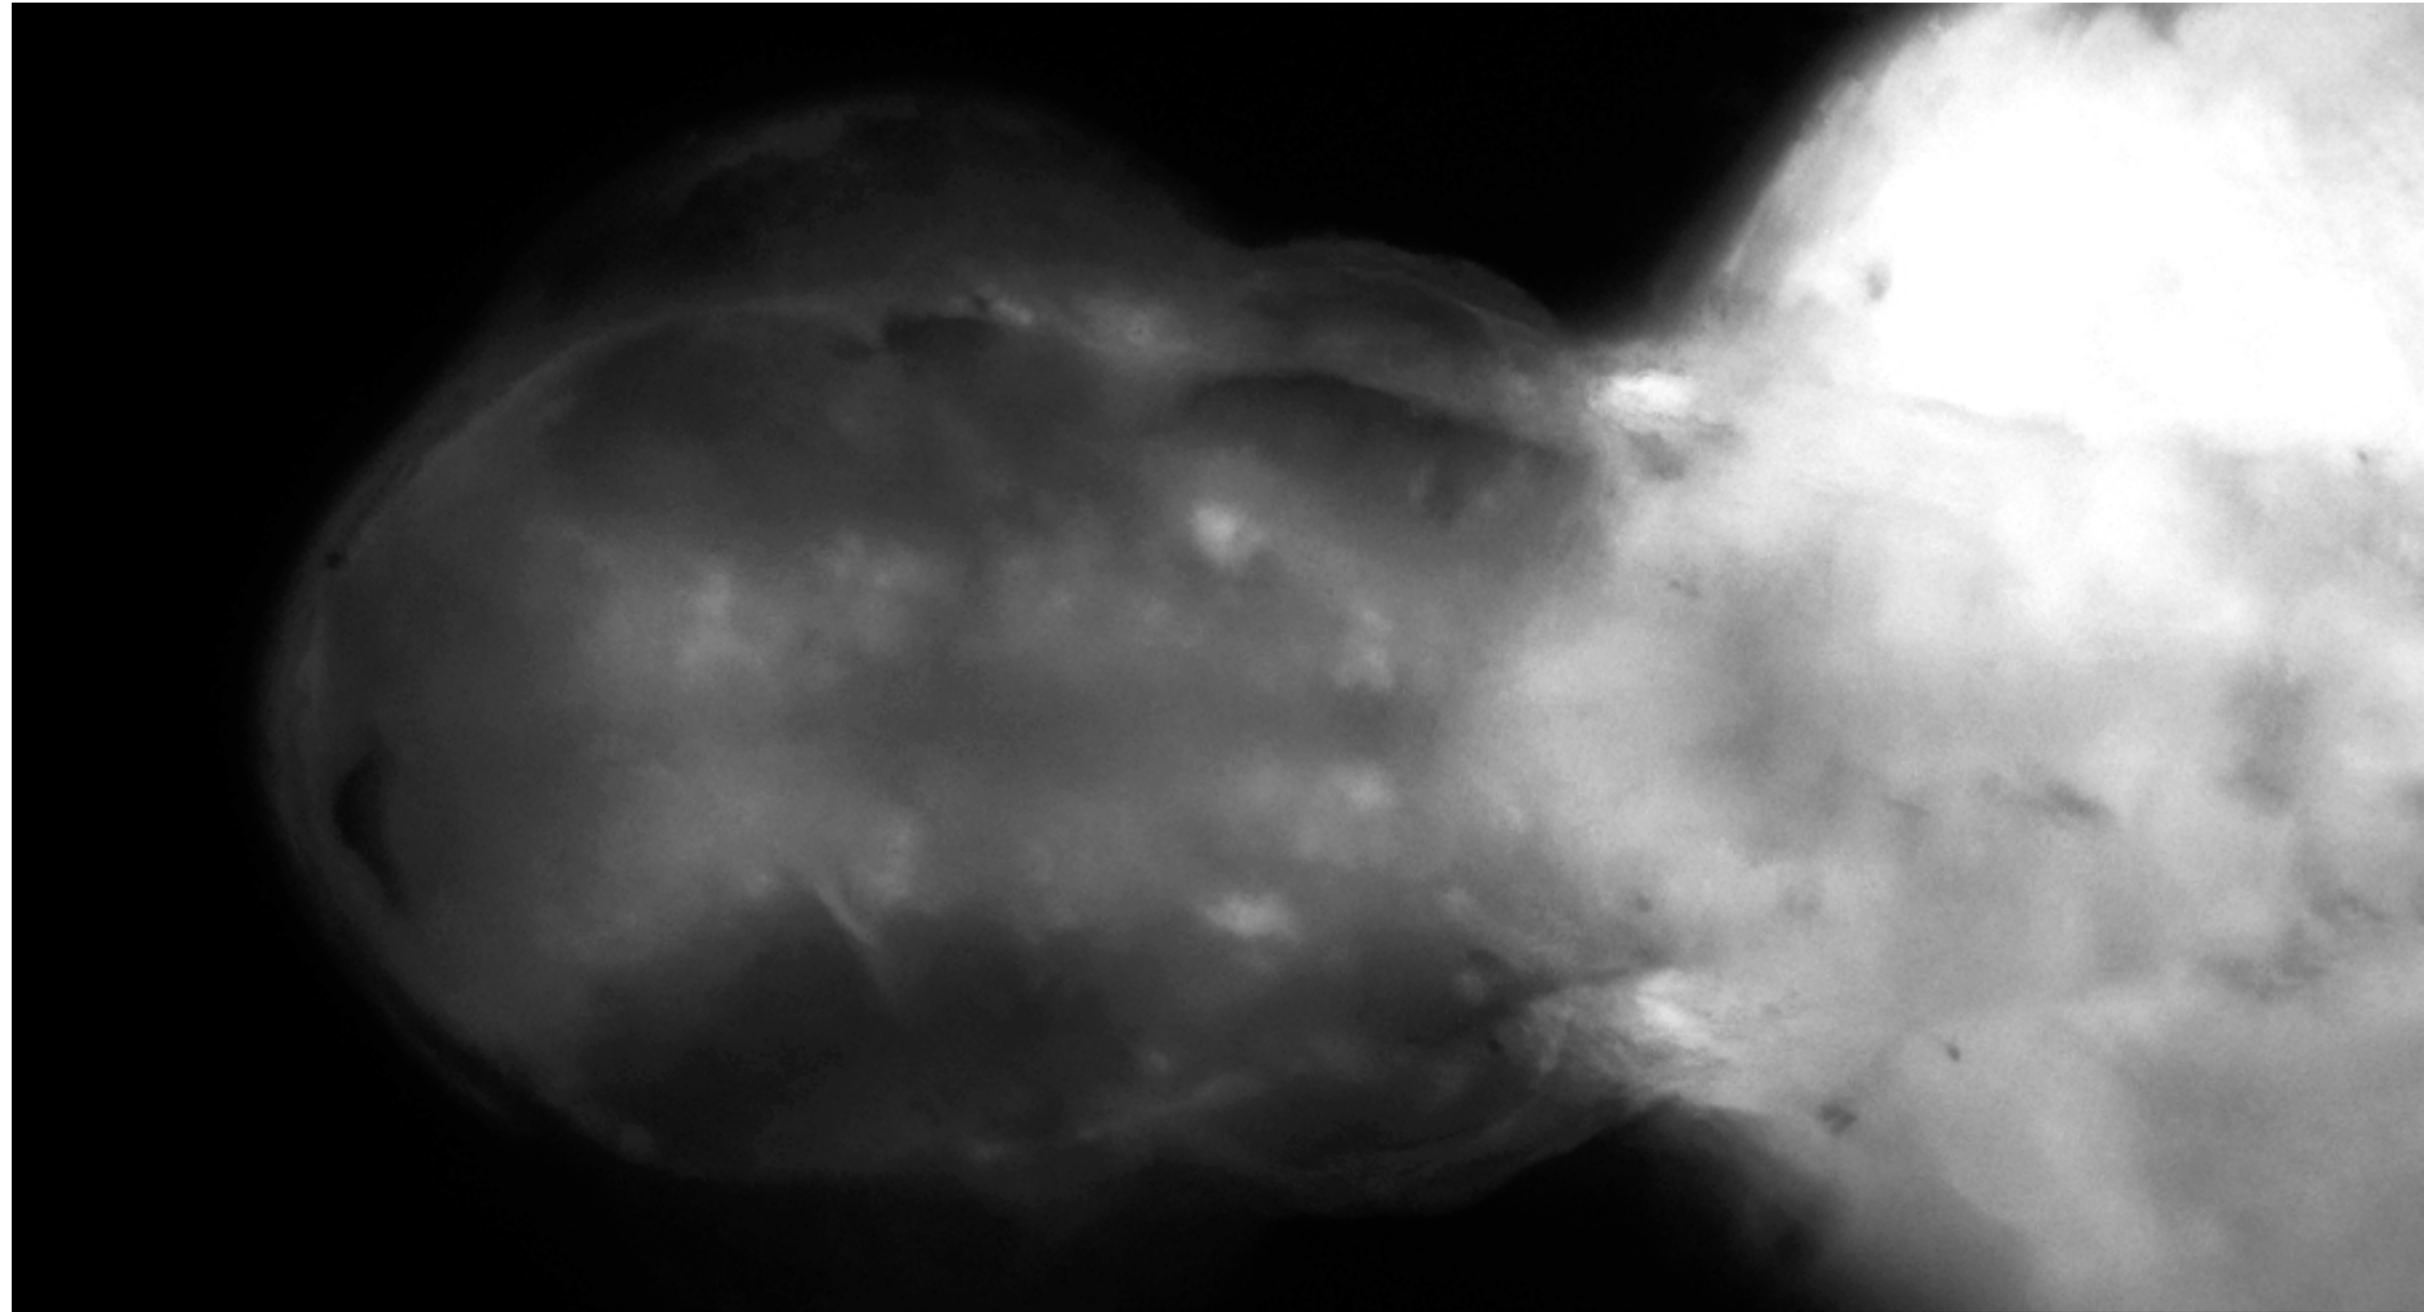

*Lmx1b*\_59.40

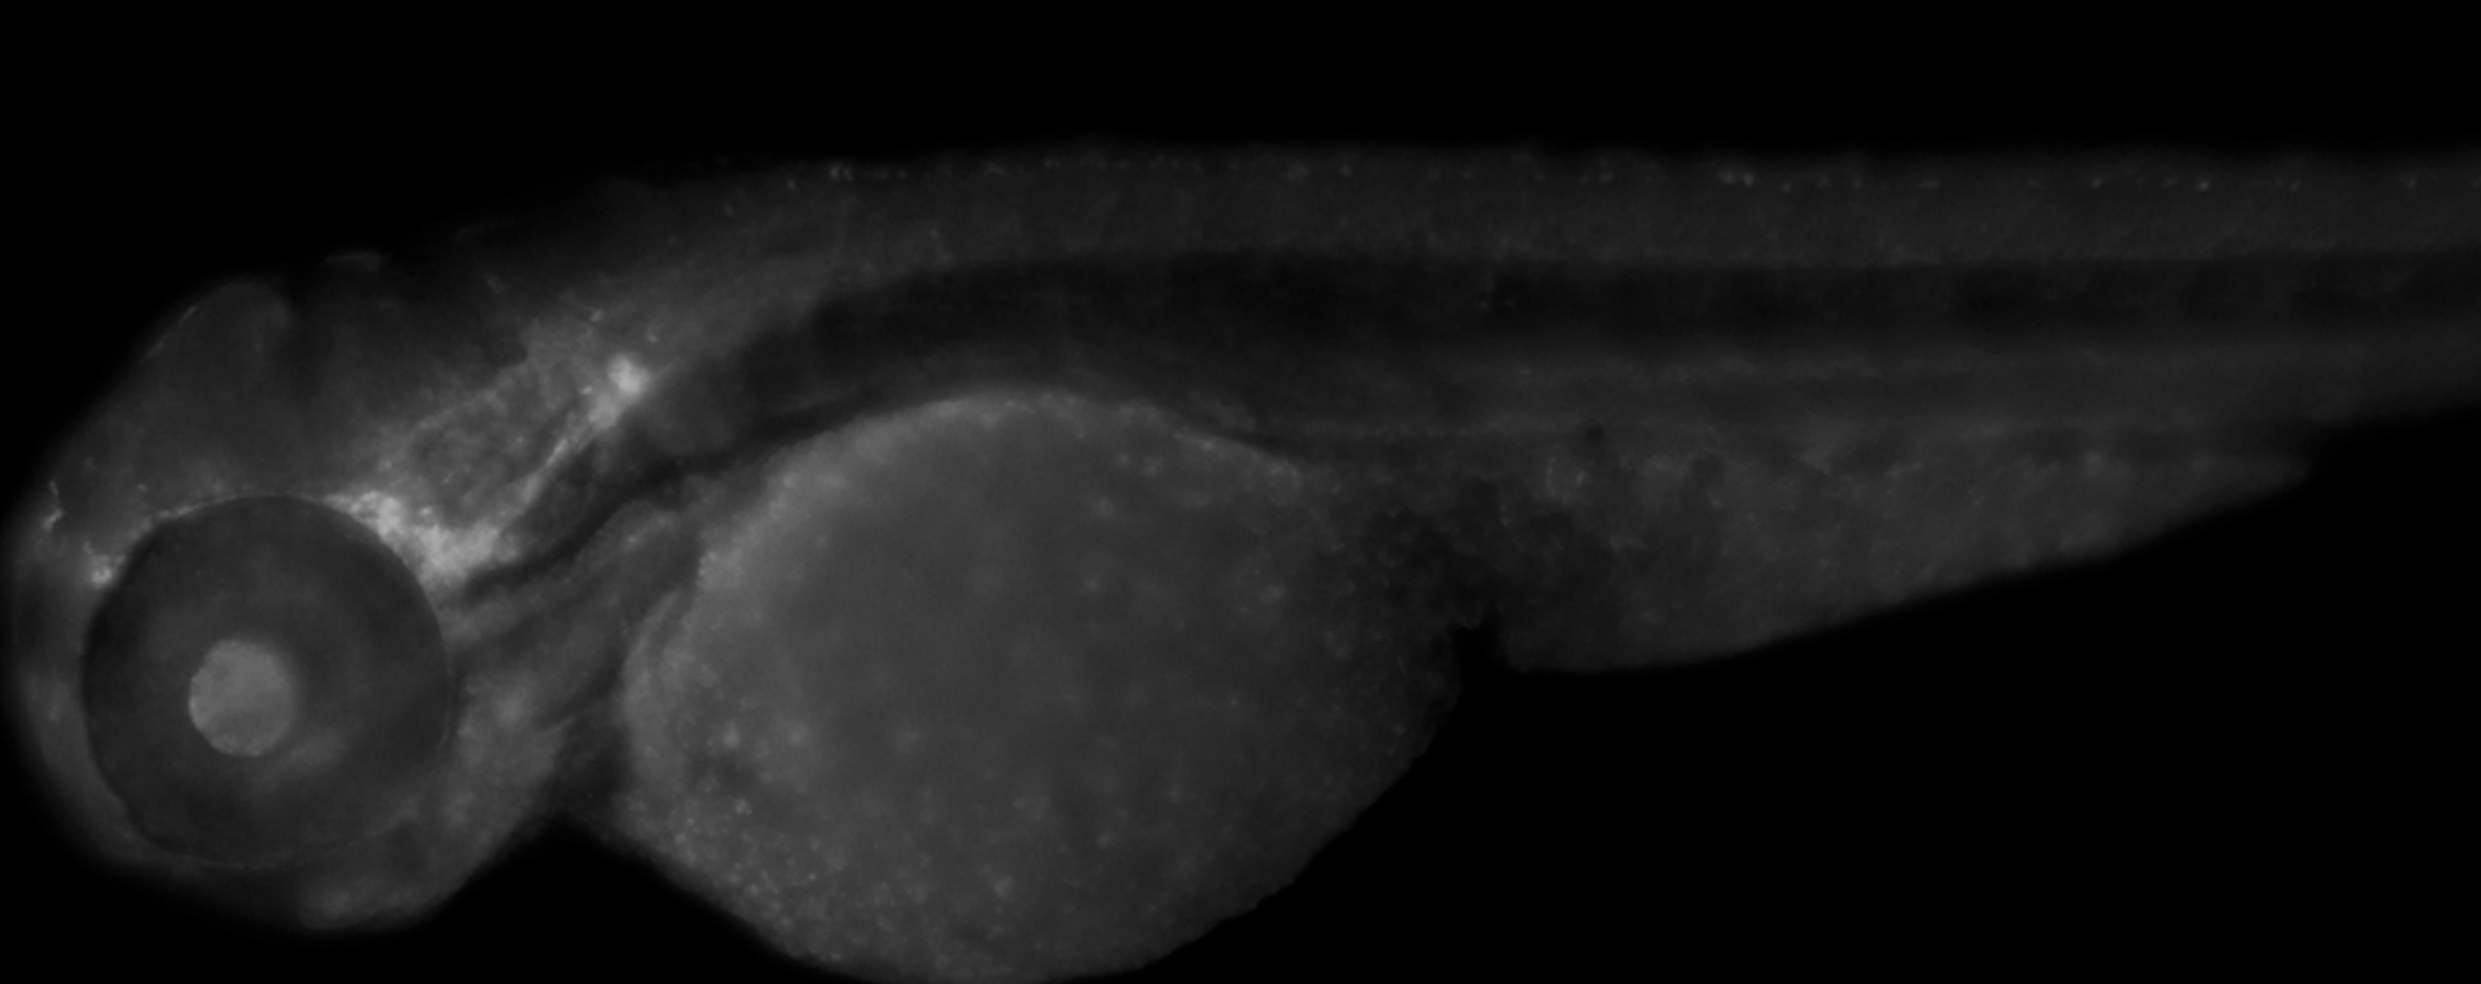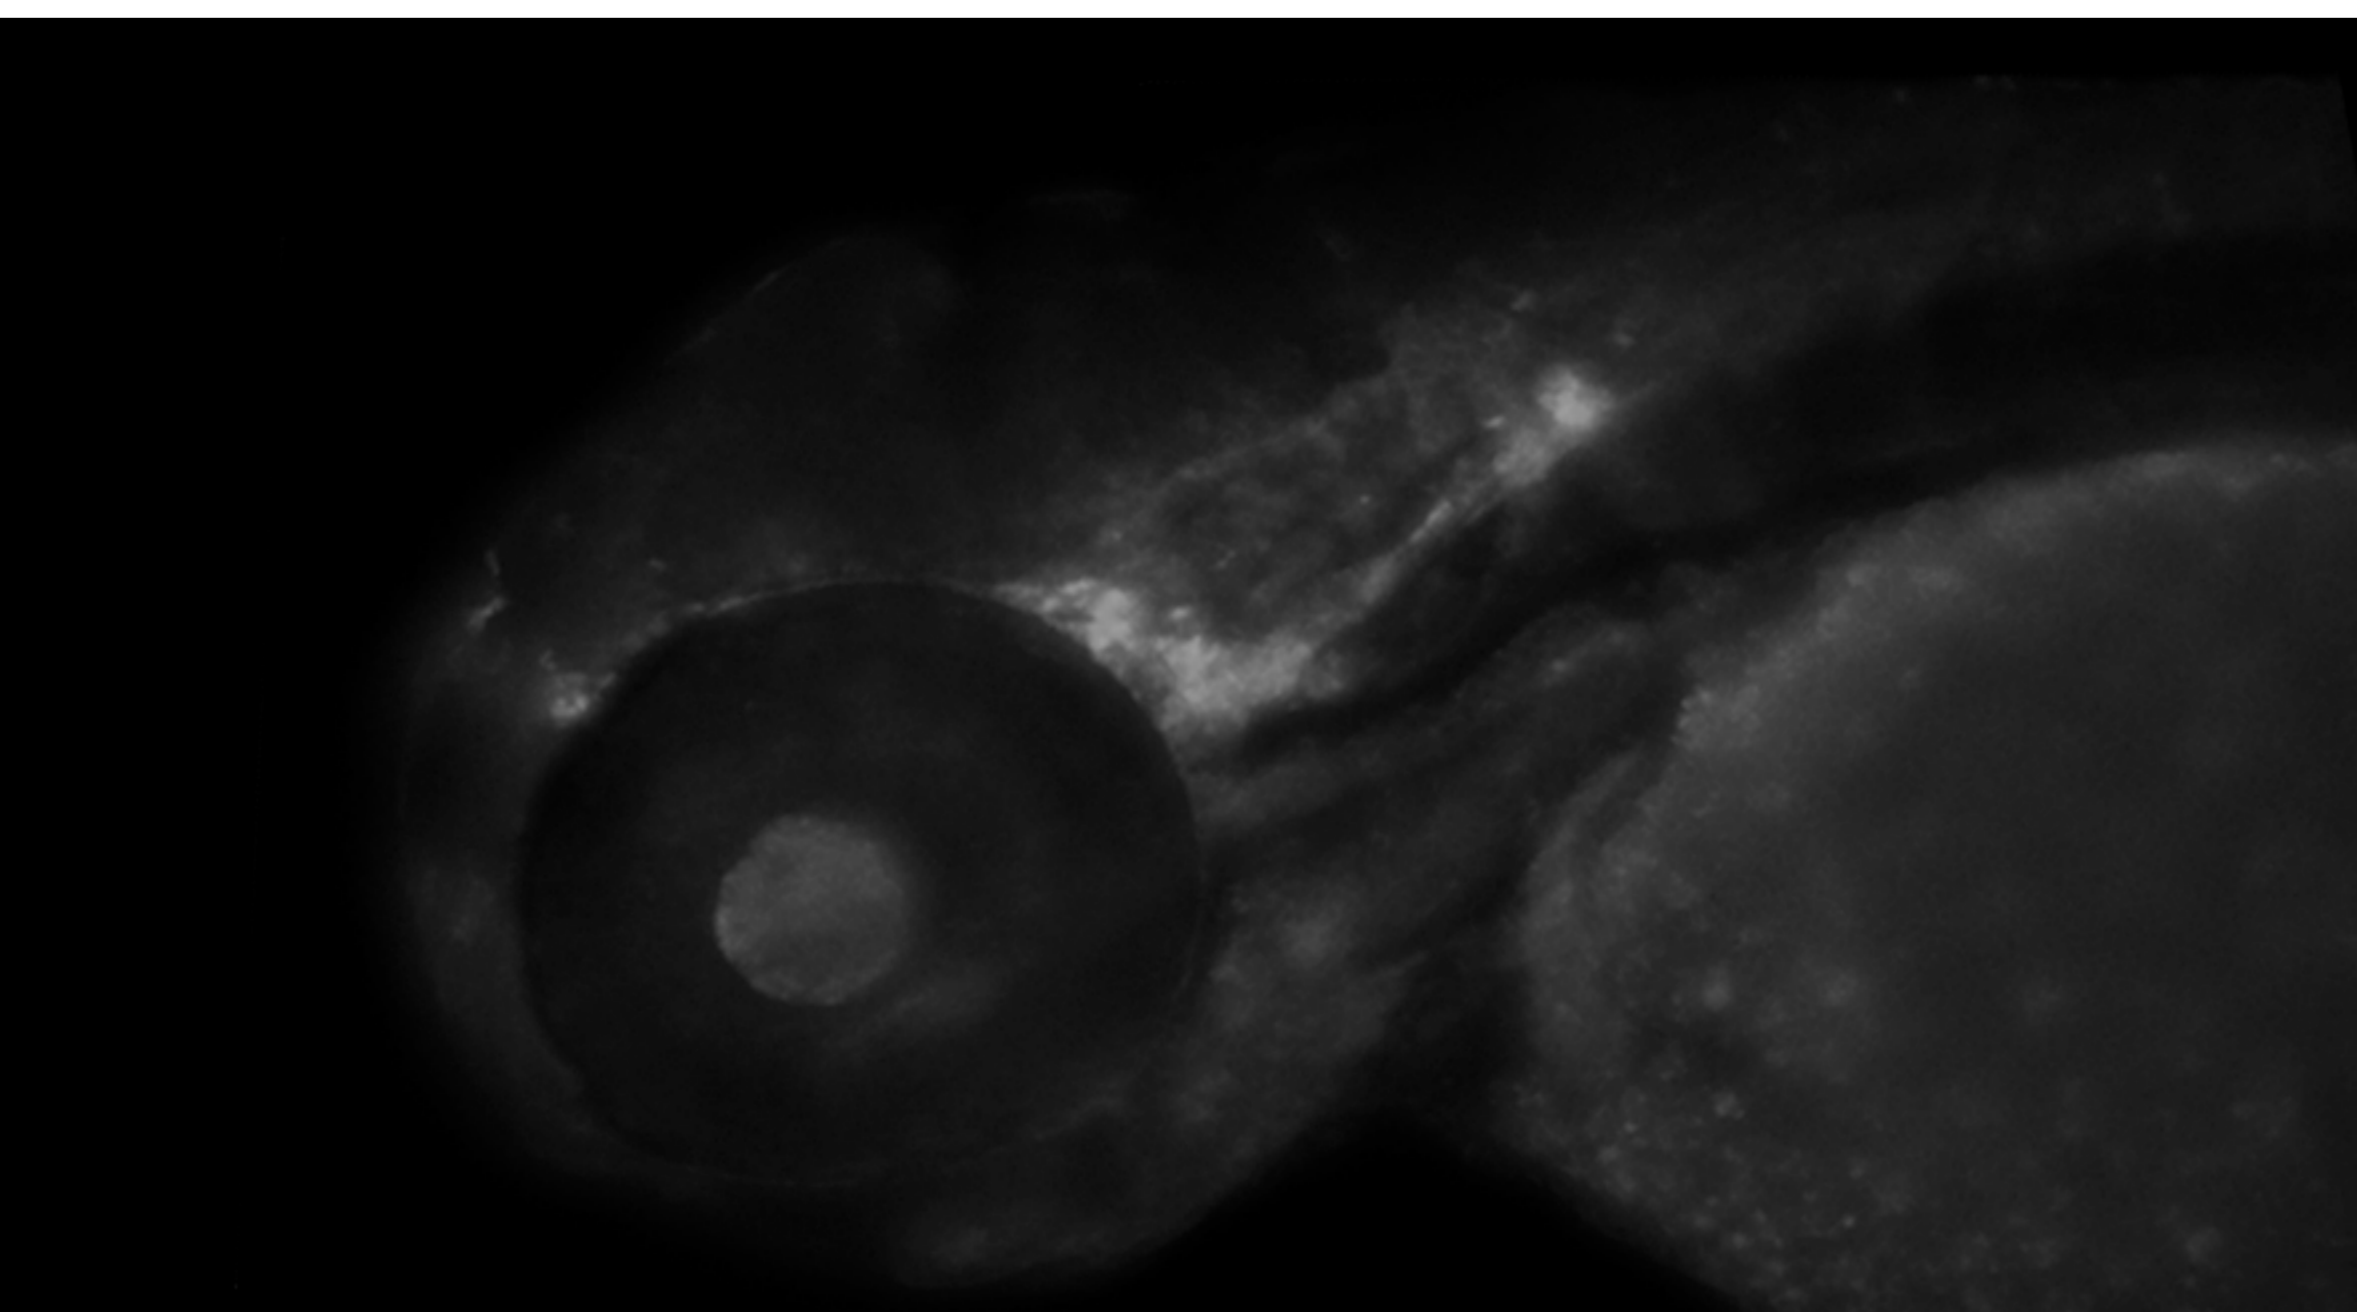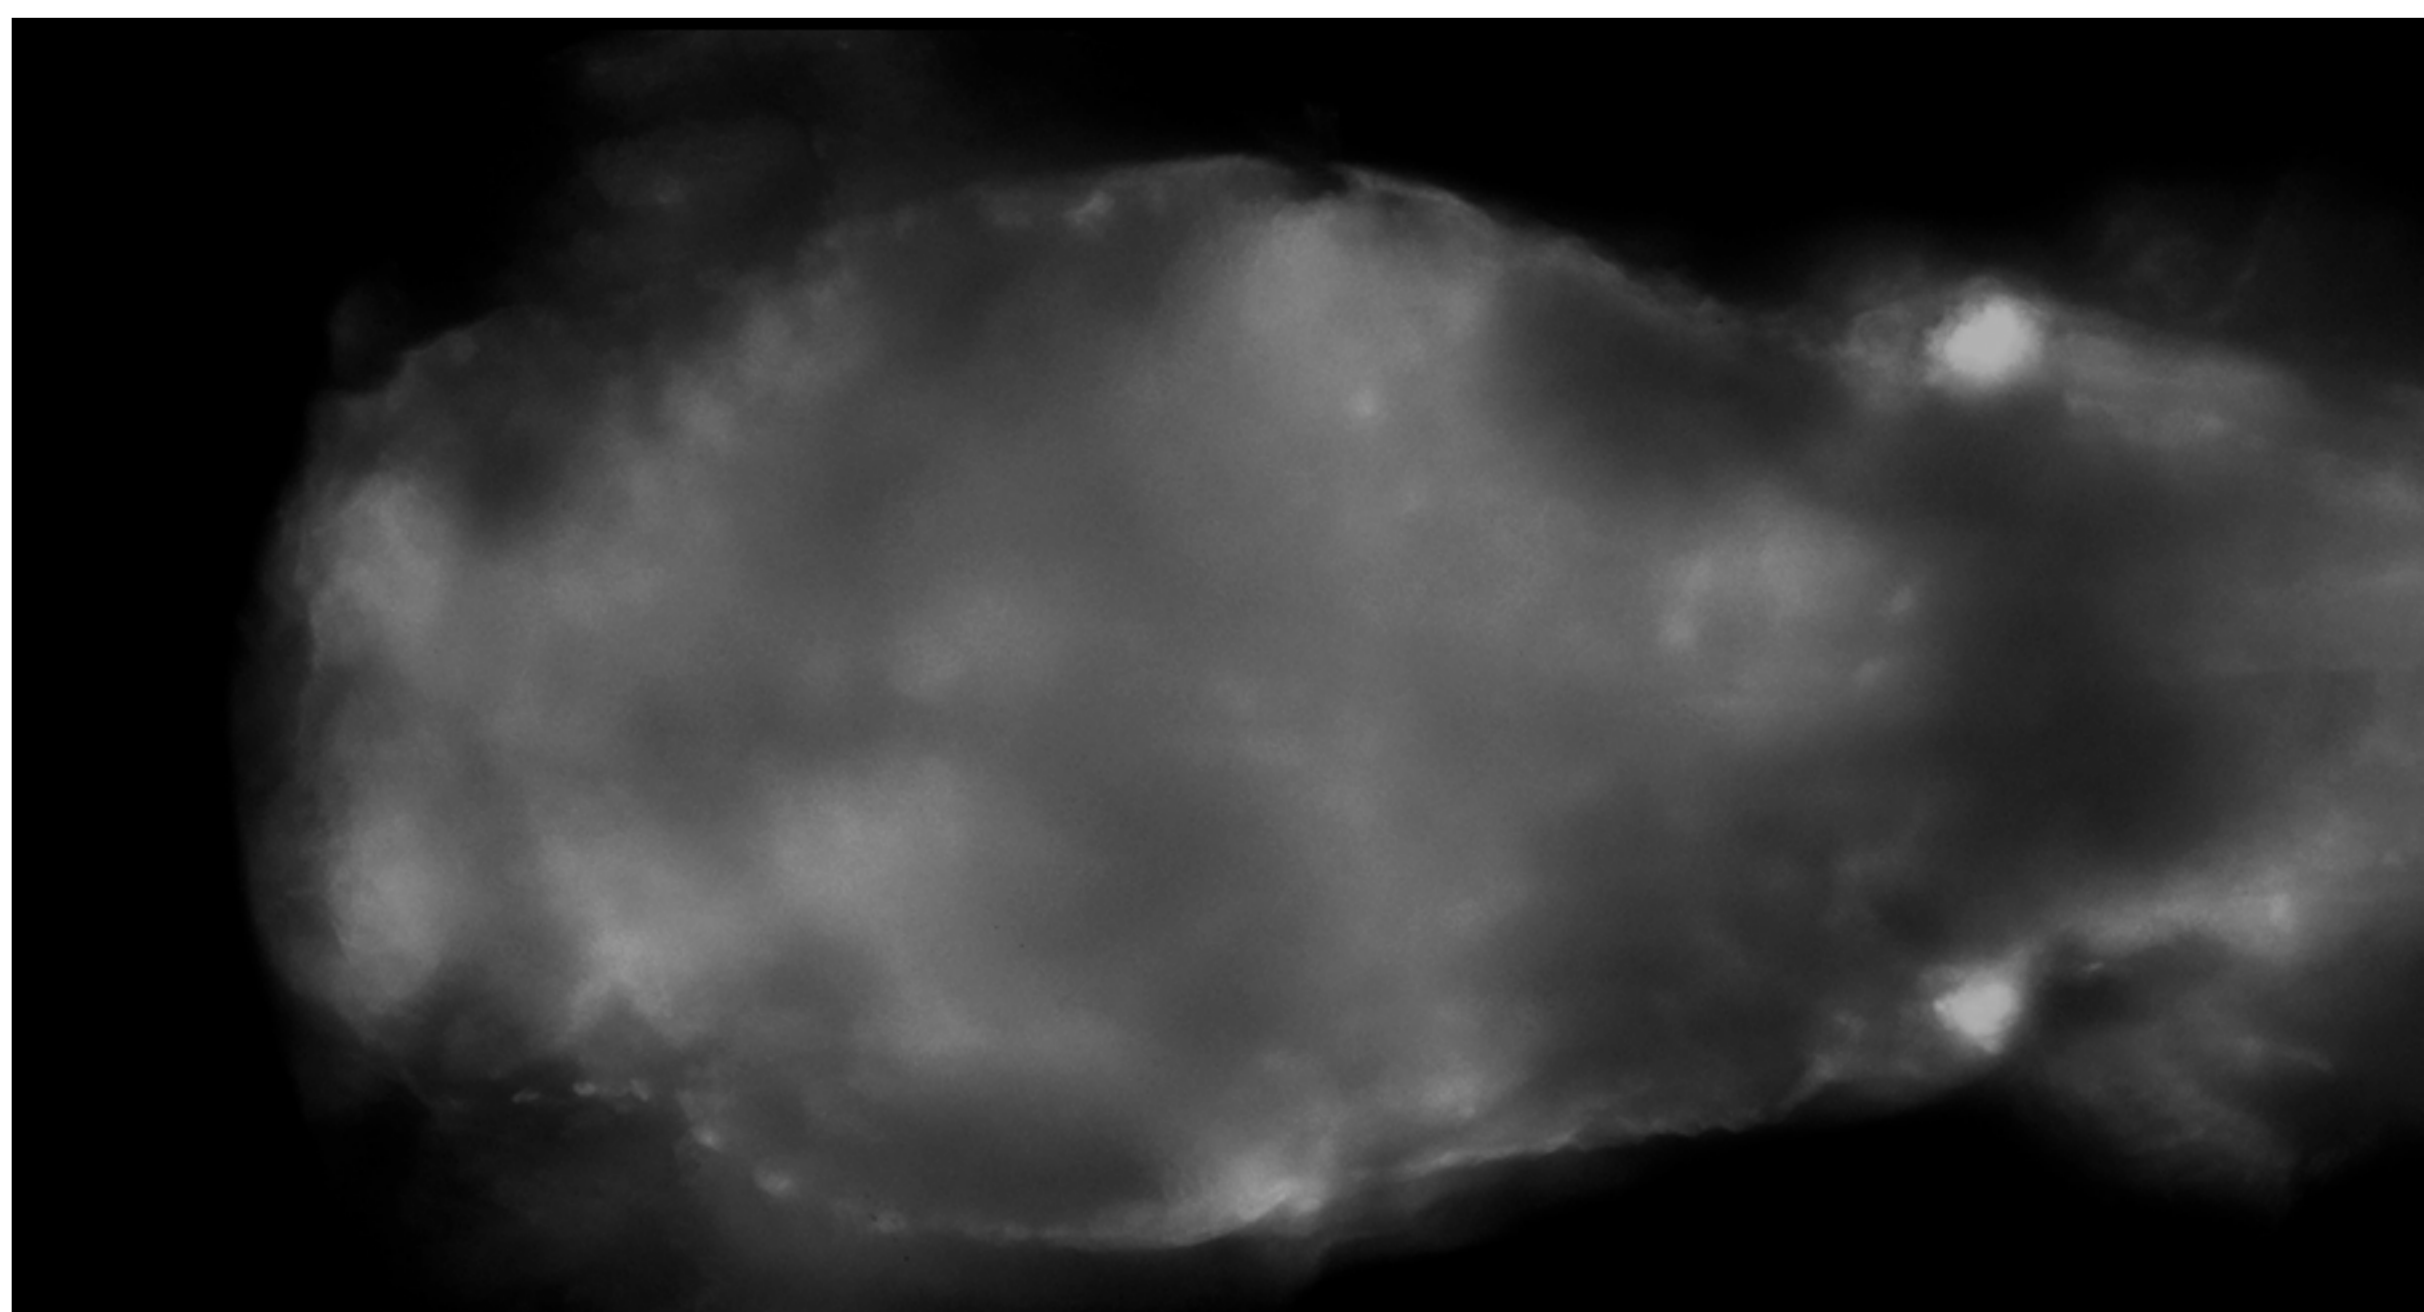

Supplement: NIHMS515584-supplement-438_2013_771_MOESM4_ESM.pdf [file NIHMS515584-supplement-438_2013_771_MOESM4_ESM.pdf]

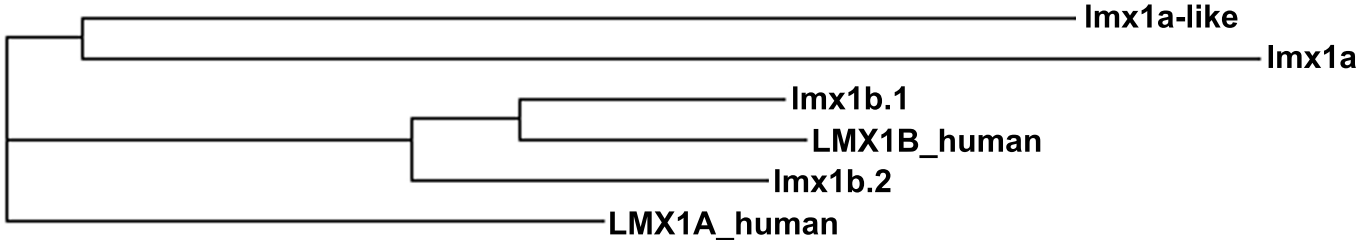

Supplement: NIHMS515584-supplement-438_2013_771_MOESM5_ESM.pdf [file NIHMS515584-supplement-438_2013_771_MOESM5_ESM.pdf]
